# Supplementary material
Source: publisher figshare collection journal article supplement (https://acs.figshare.com/ndownloader/files/22483715)
Supplement: Supplementary file 1 [file 22483715]

## Supporting Information

### **Pd-Catalyzed Cross-Coupling of Highly Sterically Congested Enol Carbamates with Grignard Reagents *via* C-O Bond Activation**

Zicong Chen,<sup>[a]</sup> and Chau Ming So<sup>\*[a, b]</sup>

[a] *State Key Laboratory of Chemical Biology and Drug Discovery and Department of Applied Biology and Chemical Technology, The Hong Kong Polytechnic University, Hung Hom, Kowloon, Hong Kong*

[b] *The Hong Kong Polytechnic University, Shenzhen Research Institute, Shenzhen, People's Republic of China*

E-mail: [chau.ming.so@polyu.edu.hk](mailto:chau.ming.so@polyu.edu.hk)

#### **Table of Contents**

|                                                                                |     |
|--------------------------------------------------------------------------------|-----|
| 1. General considerations.....                                                 | 2   |
| 2. Procedure and results of specific experiments.....                          | 3   |
| 3. The preparation of enol carbamate substrates.....                           | 8   |
| 4. General procedures for condition optimization and scope .....               | 12  |
| 5. Data of ligand screening .....                                              | 14  |
| 6. Characterization of products .....                                          | 17  |
| 7. <sup>1</sup> H, <sup>13</sup> C, <sup>19</sup> F-NMR and HRMS spectra ..... | 35  |
| 8. References.....                                                             | 135 |

## 1. General considerations

Unless otherwise noted, all reagents were purchased from commercial suppliers and used without purification. All Pd-catalyzed cross-coupling reactions were performed in resealable screw cap Schlenk tube (approx. 10 mL volume) in the presence of Teflon-coated magnetic stir bar (5 mm×10 mm). Solvents were distilled following the standard procedures under nitrogen.<sup>1</sup> Most of the Grignard reagents were purchased from Energy. Others were prepared according to the general procedures<sup>2</sup> and titrated according to reported methods.<sup>3</sup> Thin layer chromatography was performed on pre-coated silica gel 60 F<sub>254</sub> plates. Silica gel (Merck, 70-230 and 230-400 mesh) was used for column chromatography. Melting points were recorded on an uncorrected Büchi Melting Point B-545 instrument. NMR spectra were recorded on a Bruker spectrometer (400 MHz for <sup>1</sup>H, 100 MHz for <sup>13</sup>C, 376 MHz for <sup>19</sup>F and 162 MHz for <sup>31</sup>P). Spectra were referenced internally to the residual proton resonance in CDCl<sub>3</sub> (δ 7.26 ppm) as the internal standard. Chemical shifts (δ) were reported as part per million (ppm) in δ scale downfield from TMS. <sup>13</sup>C NMR spectra were referenced to CDCl<sub>3</sub> (δ 77.0 ppm, the middle peak). <sup>19</sup>F NMR chemical shifts were determined relative to CFCl<sub>3</sub> as the external standard and low field is positive. <sup>31</sup>P NMR spectra were referenced to 85% H<sub>3</sub>PO<sub>4</sub> externally. Coupling constants (*J*) were reported in Hertz (Hz). Mass spectra (EI-MS and ESI-MS) were recorded on a HP 5989B Mass Spectrometer. High-resolution mass spectra (HRMS) were obtained on a Bruker APEX 47e FTICR mass spectrometer (ESI-MS and APPI-MS). GC-MS analysis was conducted on a HP 5973 GCD system using a HP5MS column (30 m × 0.25 mm). The products described in GC yield were accorded to the authentic samples/dodecane calibration standard from HP 6890 GC-FID system. All yields reported refer to isolated yield of compounds estimated to be greater than 95% purity as determined by capillary gas chromatography (GC) or <sup>1</sup>H NMR. Compounds described in the literature were characterized by comparison of their <sup>1</sup>H, <sup>13</sup>C and/or <sup>19</sup>F NMR spectra to the previously reported data. The procedures in this section are representative, and thus the yields may differ from those reported in tables. In case of new and uncharacterized compounds, *Z/E*-configurations were determined by NOESY experiments recorded on a JEOL JNM-ECZ500R/S1 spectrometer.

## 2. Procedure and results of specific experiments

### 2.1 Thermal decomposition experiments

Compound cyclohex-1-en-1-yl pivalate<sup>4</sup> (0.20 mmol), cyclohex-1-en-1-yl 4-methylbenzenesulfonate<sup>5</sup> (0.20 mmol) and cyclohex-1-en-1-yl dimethylcarbamate<sup>6</sup> (0.20 mmol) were added and sealed in Schlenk tubes separately. The tubes were then put in the pre-heated oil bath (100 °C) for 16 h. After cooled down to room temperature, the tubes were separately added with dioxane (0.20 mmol) as internal standard. Then the mixtures were dissolved by CDCl<sub>3</sub> (1.0 mL) separately to perform <sup>1</sup>H NMR detection (the spectra are attached below).

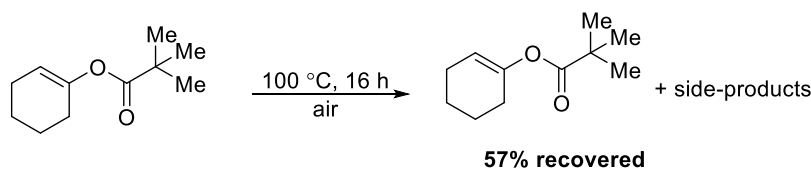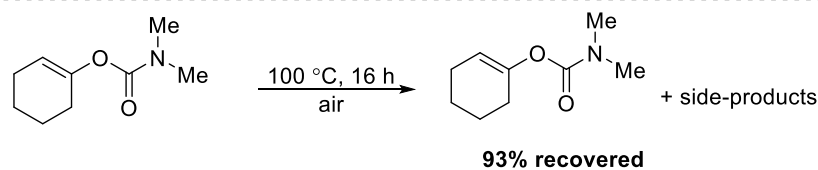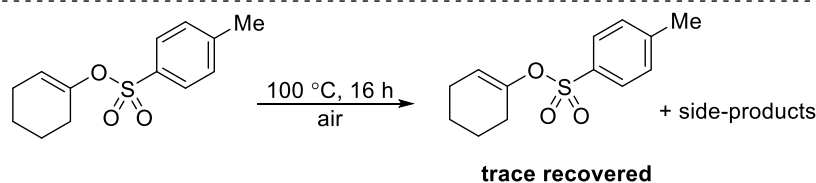

$^1\text{H}$  NMR spectra of decomposition experiments (dioxane as internal standard):

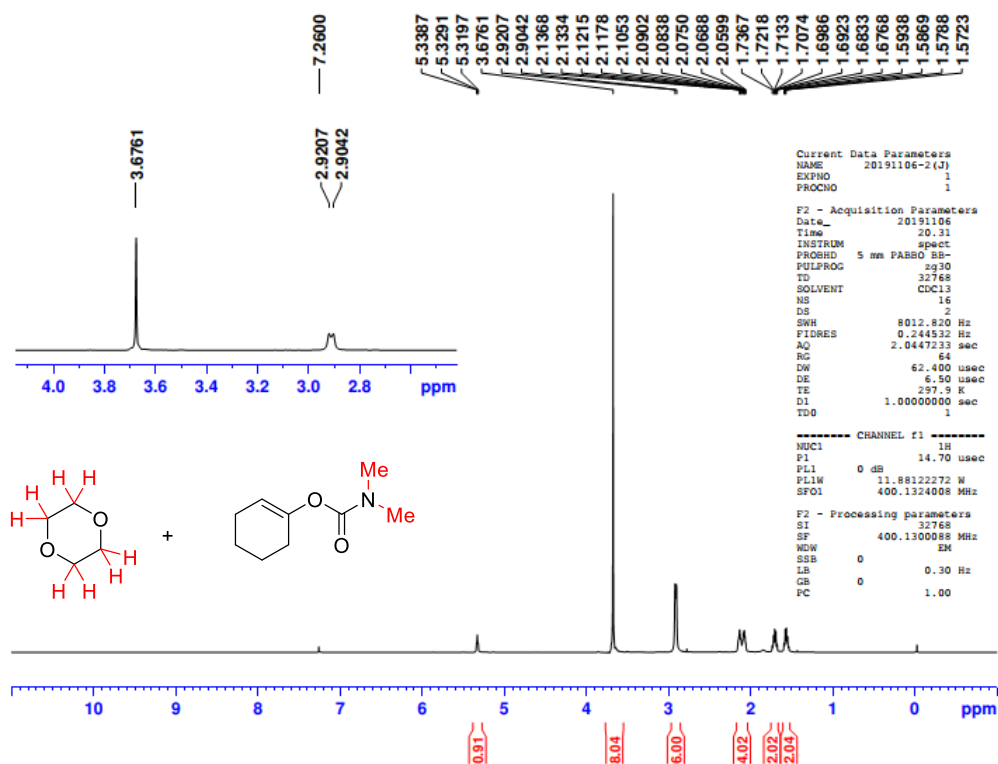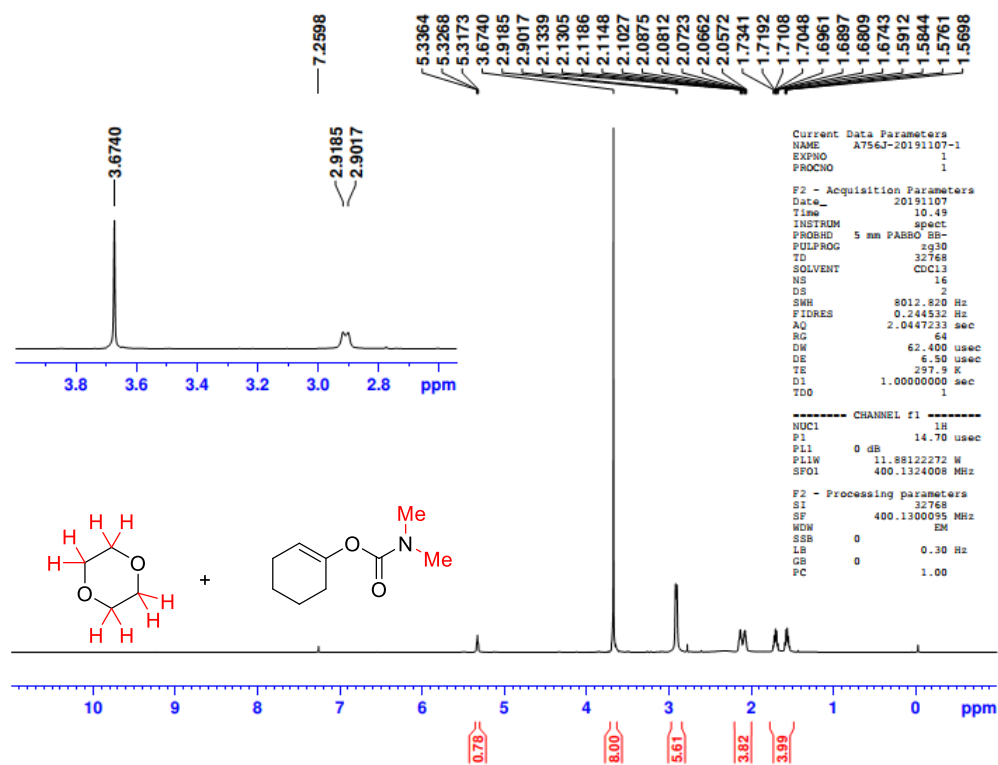

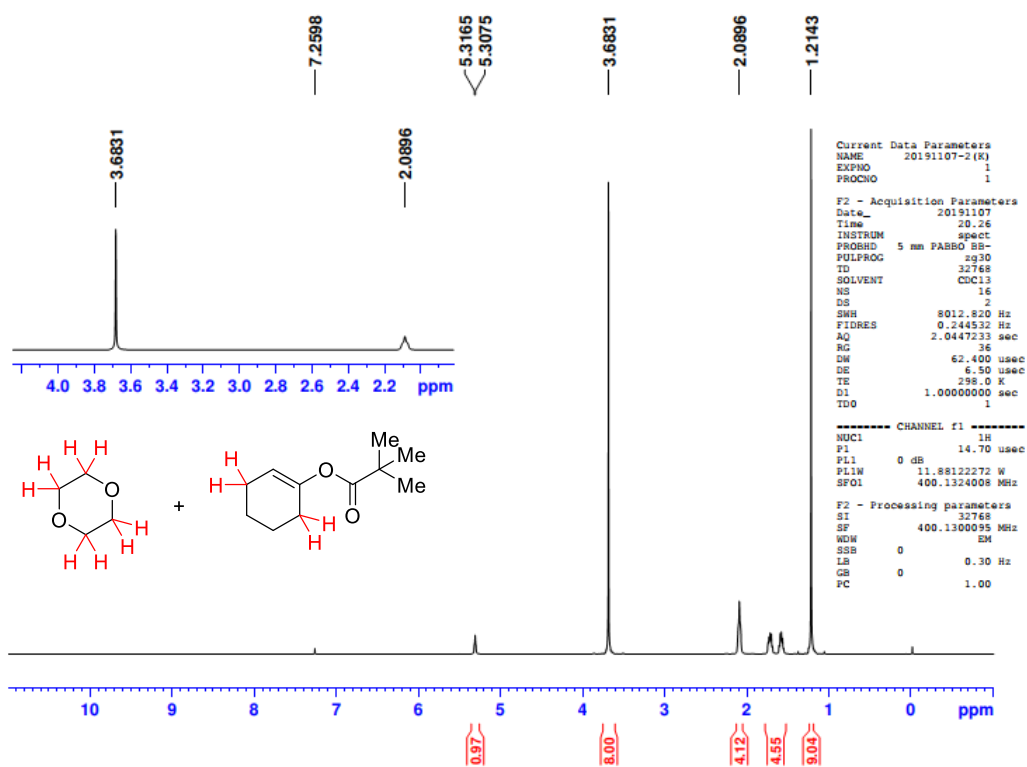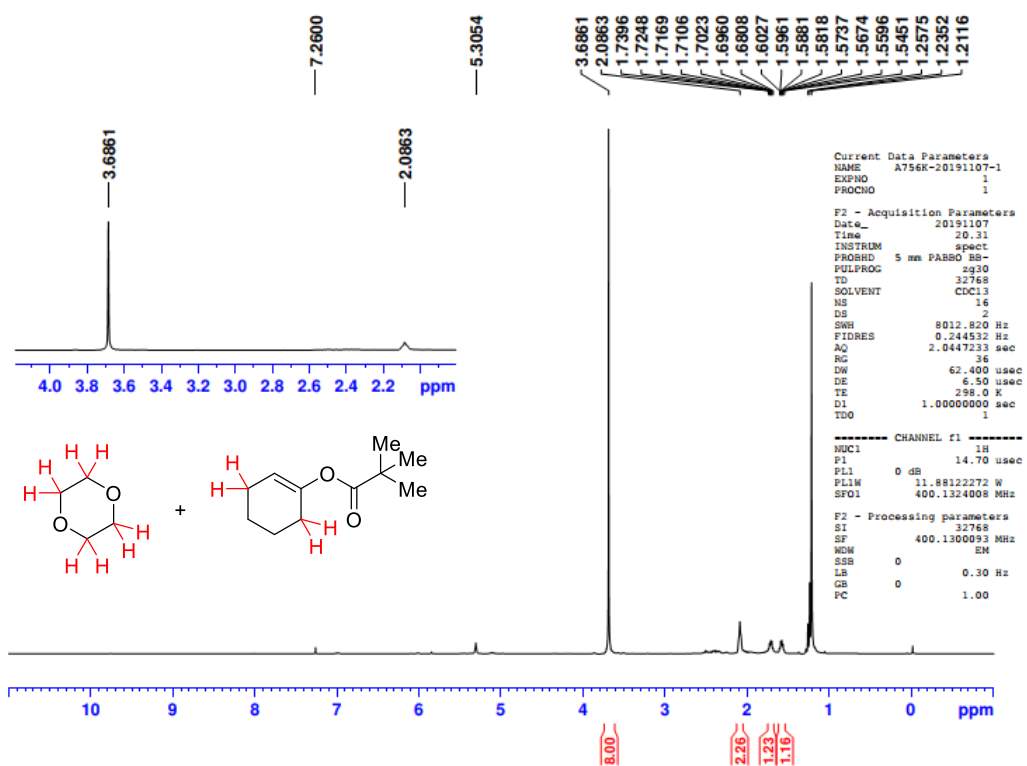

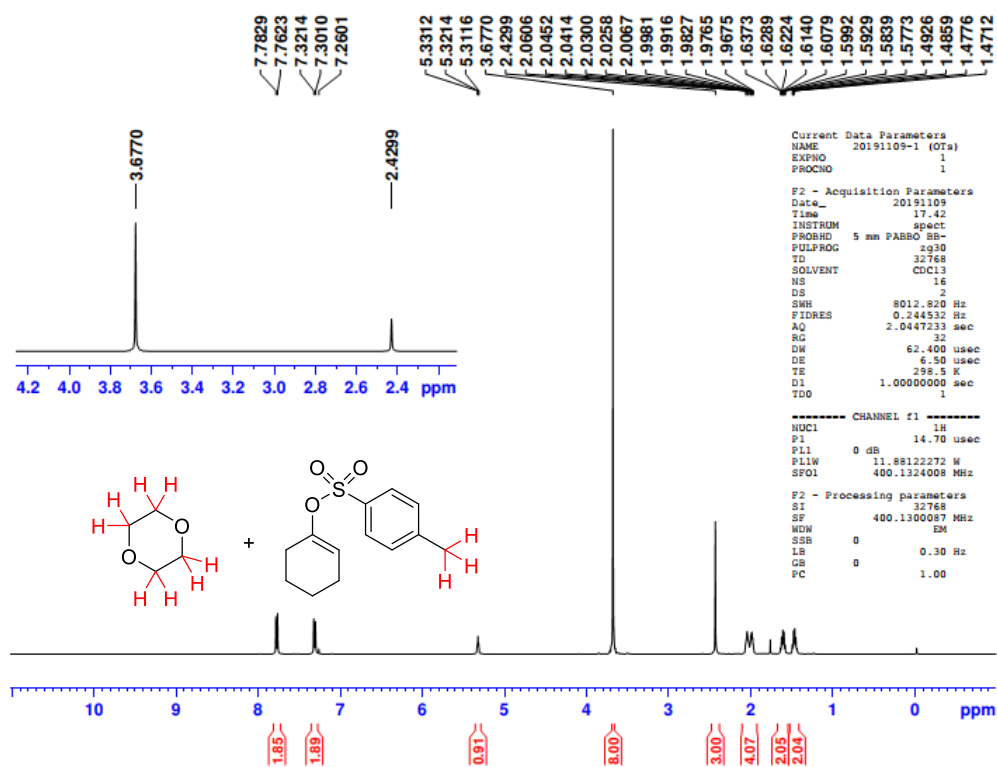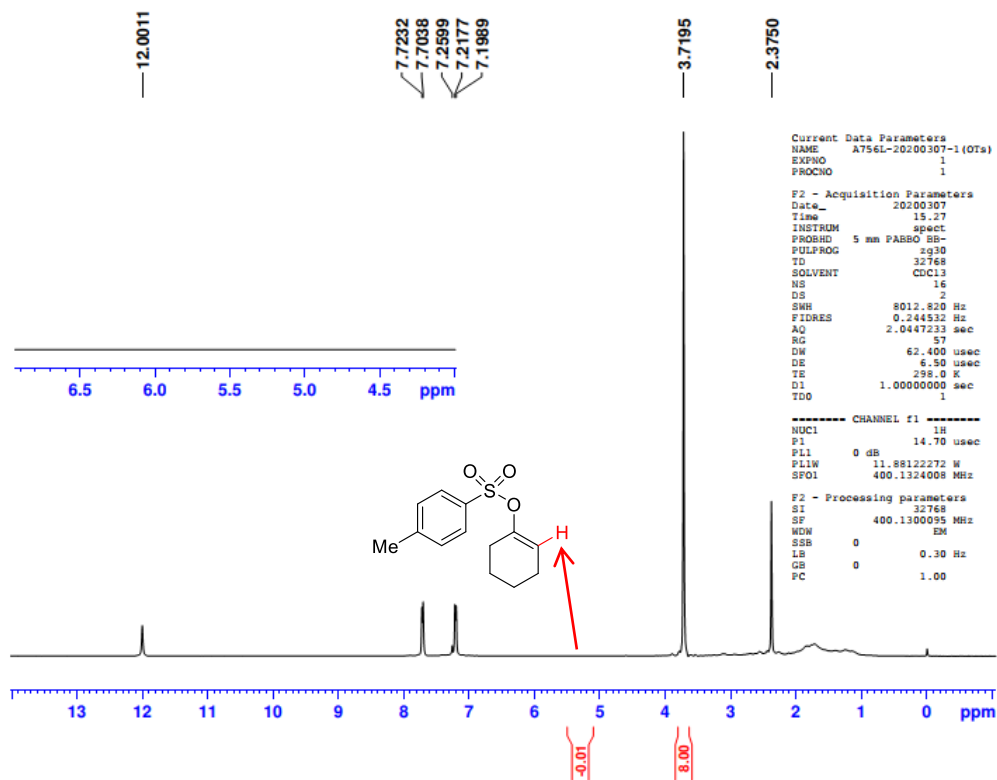

## 2.2 Selective cross-coupling of 2-oxo-2*H*-chromen-4-yl dimethylcarbamate (4b)

### Experimental procedure:

A Schlenk tube was evacuated and flushed with nitrogen (3 cycles). To this tube was charged ZnCl<sub>2</sub> (0.40 mmol, in THF) by syringe, and the solution was stirred at 0 °C. Then *p*-tolylmagnesium bromide (0.80 mmol, in THF) was added dropwise by syringe while stirring. The mixture was stirred at room temperature for 30 min to give di-*p*-tolylzinc reagent.

To another separate Schlenk tube were charged Pd(OAc)<sub>2</sub> (1.8mg, 4 mol%), IMes•HCl (5.5 mg, 8 mol%), 3,4-dihydronaphthalen-2-yl dimethylcarbamate **4f** (21.7 mg, 0.10 mmol) and 2-oxo-2*H*-chromen-4-yl dimethylcarbamate **4b** (23.3 mg, 0.10 mmol). The tube was evacuated and flushed with nitrogen (3 cycles). Distilled THF (0.40 mL) was added to the tube by syringe followed by the addition of the freshly prepared di-*p*-tolylzinc reagent. The mixture was stirred for 16 h. After the reaction time, the mixture was quenched with water and extracted with EA. The organic layer was extracted and then subjected to GCMS analysis and column chromatography to give the product.

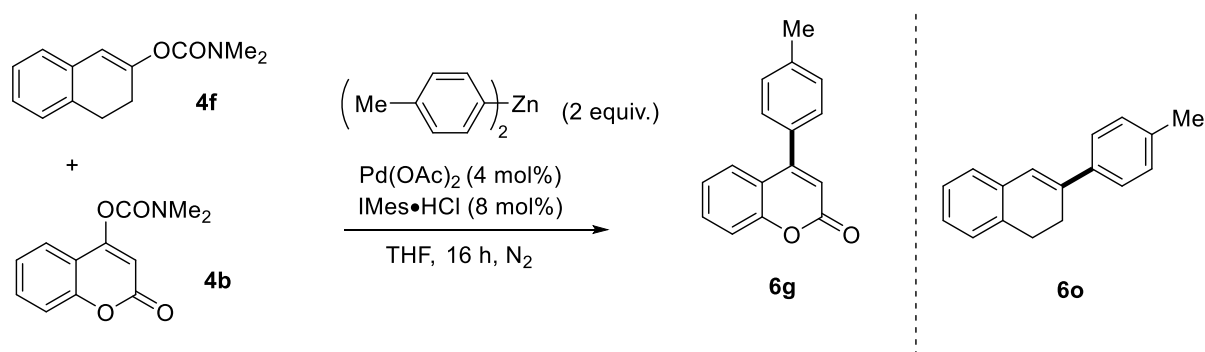

### Reaction conditions and results:

| Entry | Reaction Temperature | Yield (6g) | Yield (6o) |
|-------|----------------------|------------|------------|
| 1     | r.t.                 | 98%        | 0%         |
| 2     | 50 °C                | 77%        | 0%         |

### 3. The preparation of enol carbamate substrates

Known enol carbamates (**1a**<sup>6</sup>, **1c**<sup>6</sup>, **4b**<sup>6</sup>, **4c**<sup>7</sup>, **4e**<sup>6</sup>, **4f**<sup>6</sup>) were synthesized according to the reported procedure.

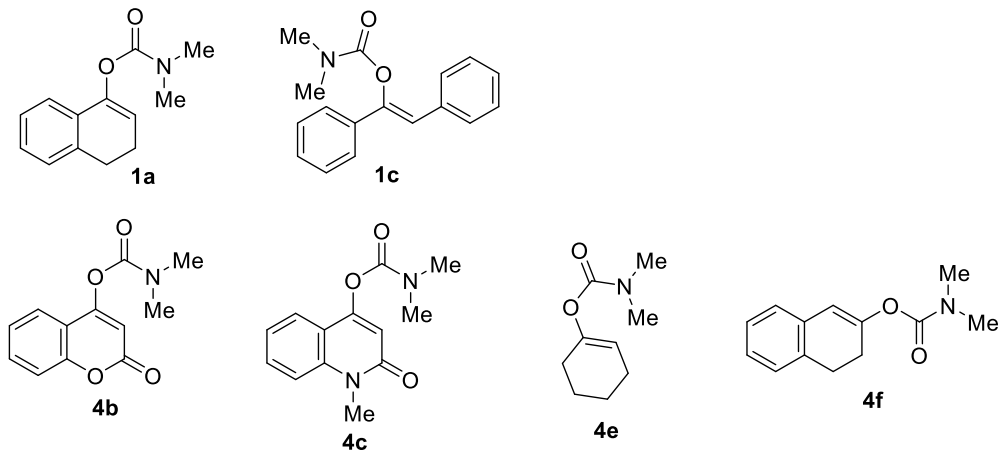

#### 6,7-Dihydro-5H-benzo[7]annulen-9-yl dimethylcarbamate (**1b**)

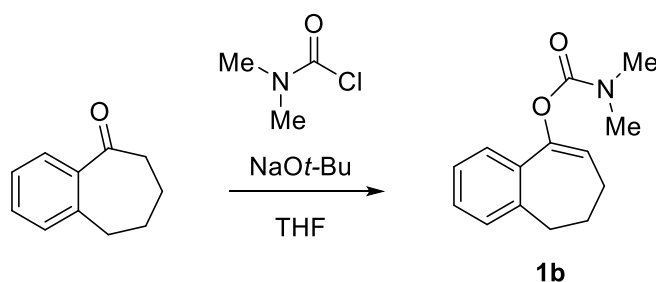

Compound 6,7-Dihydro-5H-benzo[7]annulen-9-yl dimethylcarbamate **1b** was synthesized by modifying a previous procedure.<sup>8</sup> In a 250 mL round-bottomed flask under magnetic stirring and nitrogen atmosphere was added 6,7,8,9-tetrahydro-5H-benzo[7]annulen-5-one (1.60 g, 10.0 mmol) in THF (30 mL). The reaction mixture was cooled to -20 °C. Sodium *tert*-butoxide (1.15 g, 12.0 mmol) was added in one portion. The solution was stirred at -20 °C to -5 °C for 1 h then at room temperature for 30 min. When the solution was again cooled to -20 °C, *N,N*-dimethylcarbamoyl chloride (1.30 g, 12.1 mmol) was added in one portion. The resulting solution was stirred at -20 to -5 °C for 6 h, quenched with water (20 mL) and then the mixture was extracted three times with EtOAc. The combined organic layer was washed with water and brine, dried over  $\text{Na}_2\text{SO}_4$ . The residue was purified by flash silica-gel column chromatography to afford the product **1b** as a pink solid (1.86 g, 80%), M.P.: 82.5–83.7 °C,  $R_f$  = 0.2 (EA/Hexane = 1 : 20). <sup>1</sup>H NMR (400 MHz,  $\text{CDCl}_3$ )  $\delta$  2.08–2.15 (m, 4H), 2.85 (t,  $J$  = 5.6 Hz, 2H), 2.94 (s, 3H), 3.12 (s, 3H), 5.87 (t,  $J$  = 6.1 Hz, 1H), 7.19–7.24 (m, 3H), 7.28–7.31 (m, 1H); <sup>13</sup>C NMR (100 MHz,  $\text{CDCl}_3$ )  $\delta$  24.9, 31.6, 33.5, 36.3,



36.5, 119.2, 125.3, 125.9, 127.9, 129.1, 135.1, 141.8, 146.3, 155.4. HRMS (ESI): calcd. for :  $C_{14}H_{17}NO_2Na^+$   $[M + Na]^+$ : 254.1151, found 254.1158.

**(Z)-1-phenylprop-1-en-1-yl dimethylcarbamate (1d)**

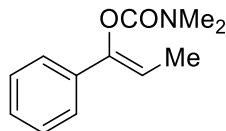

In a 250 mL round-bottomed flask under magnetic stirring and nitrogen atmosphere was added propiophenone (1.30 g, 9.70 mmol) in THF (30 mL). The reaction mixture was cooled to -20 °C. Sodium *tert*-butoxide (1.10 g, 11.6 mmol) was added in one portion. The solution was stirred at -20 °C to -5 °C for 1 h then at room temperature for 30 min. When the solution was again cooled to -20 °C, *N,N*-dimethylcarbamoyl chloride (1.30 g, 12.1 mmol) was added in one portion. The resulting solution was stirred at -20 to -5 °C for 6 h, quenched with water (20 mL) and then the mixture was extracted three times with EtOAc. The combined organic layer was washed with water and brine, dried over  $Na_2SO_4$ . The residue was purified by flash silica-gel column chromatography to afford the product **1d** as colorless liquid (1.16 g, 57%),  $R_f$  = 0.2 (EA/Hexane = 1 : 20).  $^1H$  NMR (400 MHz,  $CDCl_3$ )  $\delta$  1.78 (d,  $J$  = 7.0 Hz, 3H), 3.01 (s, 3H), 3.17 (s, 3H), 5.89 (q,  $J$  = 7.0 Hz, 1H), 7.26–7.44 (m, 5H);  $^{13}C$  NMR (100 MHz,  $CDCl_3$ )  $\delta$  11.3, 36.3, 36.7, 112.5, 124.2, 127.7, 128.3, 135.8, 147.2, 154.1. HRMS (ESI): calcd. for:  $C_{12}H_{15}NO_2Na^+$   $[M + Na]^+$ : 228.0995, found 228.1001.

**2-(Naphthalen-2-yl)cyclohex-1-en-1-yl dimethylcarbamate (4a)**

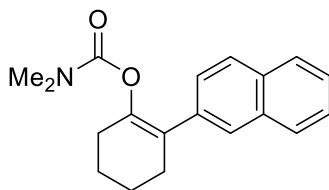

In a 250 mL round-bottomed flask was added 2-(naphthalen-2-yl)cyclohexan-1-one (1.70 g, 7.60 mmol). The flask was evacuated and flushed with nitrogen (3 cycles) and THF (30 mL) was added. The reaction mixture was cooled to -20 °C. Sodium *tert*-butoxide (0.88 g, 9.10 mmol) was added in one portion. The solution was stirred at -20 °C to -5 °C for 1 h then at room temperature for 30 min. When the solution was again cooled to -20 °C, *N,N*-dimethylcarbamoyl chloride (0.98 g, 9.10 mmol) was added in one portion. The resulting solution was stirred at -20 to -5 °C for 6 h, quenched with water (20 mL) and then the mixture was extracted three times with EtOAc. The combined organic layer was washed with

water and brine, dried over  $\text{Na}_2\text{SO}_4$ . The residue was purified by flash silica-gel column chromatography to afford the product **4a** as a white solid (1.40 g, 62%), M.P.: 71.5–73.6 °C,  $R_f = 0.2$  (EA/Hexane = 1:20).  $^1\text{H}$  NMR (400 MHz,  $\text{CDCl}_3$ )  $\delta$  1.84–1.90 (m, 4H), 2.42 (t,  $J = 6.2$  Hz, 2H), 2.54 (t,  $J = 5.6$  Hz, 2H), 2.71 (s, 3H), 2.82 (s, 3H), 7.44–7.47 (m, 3H), 7.76–7.83 (m, 4H);  $^{13}\text{C}$  NMR (100 MHz,  $\text{CDCl}_3$ )  $\delta$  22.8, 23.0, 28.1, 30.1, 36.1, 36.3, 124.6, 125.4, 125.7, 126.3, 126.6, 127.1, 127.4, 127.8, 132.2, 133.2, 137.0, 144.4, 154.7. HRMS (ESI): calcd. for:  $\text{C}_{19}\text{H}_{22}\text{NO}_2^+ [\text{M} + \text{H}]^+$ : 296.1645, found 296.1653.

### Cyclohept-1-en-1-yl dimethylcarbamate (**4d**)

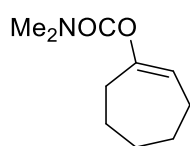

In a 250 mL round-bottomed flask under magnetic stirring and nitrogen atmosphere was added cycloheptanone (1.70 g, 15.2 mmol) in THF (30 mL). The reaction mixture was cooled to -20 °C. Sodium *tert*-butoxide (1.80 g, 18.2 mmol) was added in one portion. The solution was stirred at -20 °C to -5 °C for 1 h then at room temperature for 30 min. When the solution was again cooled to -20 °C, *N,N*-dimethylcarbamoyl chloride (1.90 g, 18.2 mmol) was added in one portion. The resulting solution was stirred at -20 to -5 °C for 6 h, quenched with water (20 mL) and then the mixture was extracted three times with EtOAc. The combined organic layer was washed with water and brine, dried over  $\text{Na}_2\text{SO}_4$ . The residue was purified by flash silica-gel column chromatography to afford the product **4d** as colorless liquid (0.57 g, 21%),  $R_f = 0.2$  (EA/Hexane = 1:20).  $^1\text{H}$  NMR (400 MHz,  $\text{CDCl}_3$ )  $\delta$  1.57–1.62 (m, 2H), 1.65–1.74 (m, 4H), 2.09 (q,  $J = 6.4$  Hz, 2H), 2.33 (t,  $J = 4.5$  Hz, 2H), 2.93 (s, 6H), 5.47 (t,  $J = 6.5$  Hz, 1H);  $^{13}\text{C}$  NMR (100 MHz,  $\text{CDCl}_3$ )  $\delta$  25.1, 25.3, 27.0, 31.1, 33.3, 36.2, 117.4, 153.5, 155.4. HRMS (ESI): calcd. for:  $\text{C}_{10}\text{H}_{17}\text{NO}_2\text{Na}^+ [\text{M} + \text{Na}]^+$ : 206.1151, found 206.1156.

Procedures for the preparation of compound **10a** and **10b**:

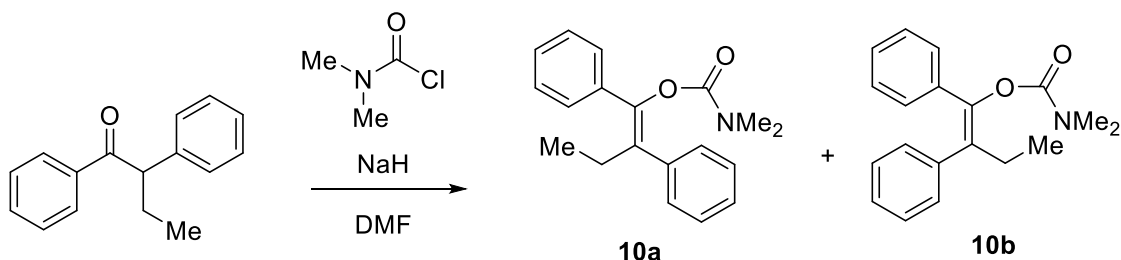

To a 20 mL dry flask was added sodium hydride (60% w/w dispersion in mineral oil; 80.0 mg,

2.00 mmol) followed by the addition of DMF (5 mL). The reaction mixture was stirred at r.t. under nitrogen atmosphere. 1,2-Diphenylbutan-1-one (224 mg, 1.00 mmol) was added in 2 portions. The mixture was stirred at room temperature till the H<sub>2</sub> release ceased, then the mixture was stirred at 75 °C for 30 min. Then the mixture was allowed to cool down to room temperature and *N,N*-dimethylcarbamoyl chloride (323 mg, 3.00 mmol) was added dropwise. The resulting mixture was stirred at room temperature overnight. The mixture was quenched with water and then the mixture was extracted three times with EtOAc. The combined organic layer was washed with water and brine, dried over Na<sub>2</sub>SO<sub>4</sub>. The residue was purified by flash silica-gel column chromatography (Hexane: EA = 50:1~20:1) to give the two isomers (64% yield; **10a** + **10b**).

**(Z)-1,2-diphenylbut-1-en-1-yl dimethylcarbamate (10a)**

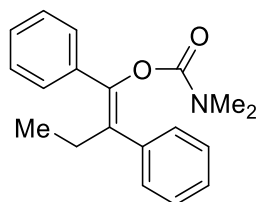

White solid (131 mg, 44%), M.P.: 95.2–96.5 °C, *R*<sub>f</sub> = 0.7 (EA/Hexane = 1 : 4). <sup>1</sup>H NMR (400 MHz, CDCl<sub>3</sub>) δ 0.97 (t, *J* = 7.4 Hz, 3H), 2.48 (q, *J* = 7.4 Hz, 2H), 2.64 (s, 3H), 2.73 (s, 3H), 7.25–7.28 (m, 1H), 7.31–7.40 (m, 7H), 7.51–7.53 (m, 2H); <sup>13</sup>C NMR (100 MHz, CDCl<sub>3</sub>) δ 13.1, 26.2, 36.0, 36.4, 126.7, 127.8, 128.0, 128.1, 128.3, 128.6, 132.0, 136.3, 138.9, 142.5, 154.9. The configuration was determined by NOESY. HRMS (APPI): calcd. for: C<sub>19</sub>H<sub>22</sub>NO<sub>2</sub><sup>+</sup> [*M* + *H*]<sup>+</sup>: 296.1645, found 296.1647.

**(E)-1,2-diphenylbut-1-en-1-yl dimethylcarbamate (10b)**

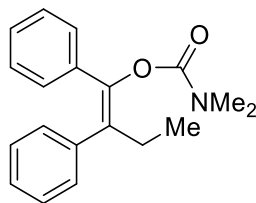

White solid (60.0 mg, 20%), M.P.: 68.7–71.3 °C, *R*<sub>f</sub> = 0.65 (EA : Hexane = 1 : 4). <sup>1</sup>H NMR (400 MHz, CDCl<sub>3</sub>) 1.00 (t, *J* = 7.5 Hz, 3H), 2.56 (q, *J* = 7.5 Hz, 2H), 2.95 (s, 3H), 3.15 (s, 3H), 7.08–7.22 (m, 10H); <sup>13</sup>C NMR (100 MHz, CDCl<sub>3</sub>) δ 12.2, 26.1, 36.3, 36.6, 126.6, 127.2, 127.6, 128.0, 129.6, 132.8, 136.1, 139.5, 143.0, 154.6. The configuration was determined by NOESY. HRMS (APPI): calcd. for: C<sub>19</sub>H<sub>22</sub>NO<sub>2</sub><sup>+</sup> [*M* + *H*]<sup>+</sup>: 296.1645, found 296.1646.

## 4. General procedures for condition optimization and scope

### 4.1 General procedures for ligand screening (GP1)

An array of Schlenk tubes were charged with Teflon-coated magnetic stir bar (5 mm × 10 mm), Pd(OAc)<sub>2</sub> (1.8 mg, 4 mol%), ligands (8 mol%), and then were evacuated and flushed with nitrogen (3 cycles). 3,4-Dihydronaphthalen-1-yl dimethylcarbamate (0.20 mmol), the freshly distilled THF (0.40 mL) and mesitylmagnesium bromide (0.40 mmol, in THF) were added by syringes to the array of Schlenk tubes respectively. The batch of Schlenk tubes were sealed and magnetically stirred in a preheated oil bath at 50 °C for 1 h. When cooled down to room temperature, ethyl acetate (~4 mL), dodecane (45.2 µL, internal standard) and water (~2 mL) were added. The organic layer after extraction was subjected to GC analysis. The GC yield was previously calibrated by authentic sample/dodecane calibration curve.

### 4.2 General procedures for condition optimization (GP2)

Stock solutions of Pd(OAc)<sub>2</sub> and IPr•HCl (Pd/L = 1:2) in freshly distilled THF were first prepared under N<sub>2</sub>. The concentrations were solution A (1 mol% of Pd / 0.40 mL) and solution B (2 mol% of Pd / 0.40 mL) respectively. For those entries using 4 mol% of Pd, Pd(OAc)<sub>2</sub> and ligands were added directly as solids. An array of Schlenk tubes were charged with Teflon-coated magnetic stir bar (5 mm × 10 mm), and equipped with screw cap. After the addition of solid materials, the tubes were evacuated and flushed with nitrogen (3 cycles). The Schlenk tubes were then added with 3,4-dihydronaphthalen-1-yl dimethylcarbamate (0.20 mmol) via micro-syringe. The stock solutions (if applicable) and mesitylmagnesium bromide (0.40 mmol, in THF) were added by syringes to the array of Schlenk tubes respectively. The batch of Schlenk tubes were sealed and magnetically stirred under certain conditions (detailed conditions were indicated in the manuscript). After cooled down to room temperature, ethyl acetate (~4 mL), dodecane (45.2 µL, internal standard) and water (~2 mL) were added. The organic layer was subjected to GC analysis. The GC yield was previously calibrated by authentic sample/dodecane calibration curve.

### 4.3 General procedures for the entries of the scope (GP3)

A Schlenk tube was charged with Teflon-coated magnetic stir bar (5 mm × 10 mm), Pd(OAc)<sub>2</sub> (1.8 mg, 4 mol%), ligand (8 mol%) and enol carbamate (if solid) (0.20 mmol).

Then the tube was evacuated and flushed with nitrogen (3 cycles). Enol carbamate (if liquid) (0.20 mmol) was added. Freshly distilled THF (0.40 mL) and followed by Grignard reagent (0.40 mmol, in THF) were added to the tube via syringes. The Schlenk tube was sealed and magnetically stirred at an indicated temperature and time. When cooled down to room temperature, ethyl acetate (~4 mL) and water (~2 mL) were added. The organic layer after extraction was combined. After removing the solvent, the residue was subjected to column chromatography isolation to afford the corresponding product.

## 5. Data of ligand screening

Table S5. Initial screening of ligands<sup>a</sup>

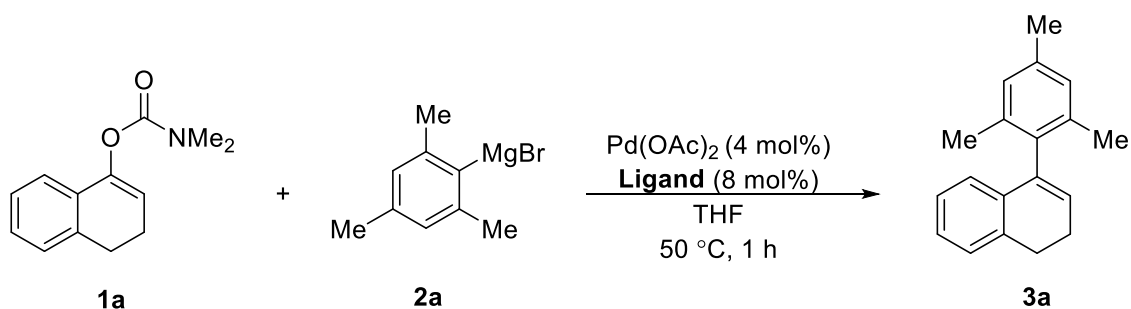

| Entry | Ligand                                                                           |  | Yield ( <b>3a</b> ) |
|-------|----------------------------------------------------------------------------------|--|---------------------|
| 1     | 1,3-Di- <i>i</i> -propylimidazolium chloride                                     |  | trace               |
| 2     | 1,3-Dicyclohexylimidazolium chloride                                             |  | 7%                  |
| 3     | 1,3-Bis(2,4,6-trimethylphenyl)imidazolinium chloride (IMes•HCl)                  |  | 80%                 |
| 4     | 1,3-Bis(2,4,6-trimethylphenyl)-4,5-dihydroimidazolium tetrafluoroborate          |  | 60%                 |
| 5     | 1,3-Bis(2,4,6-trimethylphenyl)-4,5-dihydroimidazolium chloride                   |  | 90%                 |
| 6     | 1,3-Bis(2,6-diisopropylphenyl)imidazolium Chloride (IPr•HCl)                     |  | 98%                 |
| 7     | 1,3-Bis(2,6-di- <i>i</i> -propylphenyl)-4,5-dihydroimidazolium tetrafluoroborate |  | 11%                 |

|    |                                                                                             |                                                                                      |       |
|----|---------------------------------------------------------------------------------------------|--------------------------------------------------------------------------------------|-------|
| 8  | 1,3-Bis(2,6-di- <i>i</i> -propylphenyl)-4,5-dihydroimidazolium chloride                     | 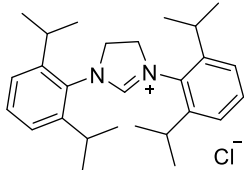   | trace |
| 9  | 1,3-Di- <i>t</i> -butylimidazolium chloride                                                 |    | trace |
| 10 | 1,3-Bis(1-adamantyl)imidazolium chloride                                                    |    | trace |
| 11 | 1,3-Bis(1-adamantyl)benzimidazolium chloride                                                |    | trace |
| 12 | Triphenylphosphine                                                                          | PPh <sub>3</sub>                                                                     | 14%   |
| 13 | Tricyclohexylphosphine                                                                      | PCy <sub>3</sub>                                                                     | 27%   |
| 14 | Dicyclohexyl(2',6'-dimethoxy-[1,1'-biphenyl]-2-yl)phosphine (SPhos)                         |  | 28%   |
| 15 | Dicyclohexyl(2',4',6'-triisopropyl-[1,1'-biphenyl]-2-yl)phosphine (XPhos)                   |  | 23%   |
| 16 | Dicyclohexyl(2',4',6'-triisopropyl-3,6-dimethoxy-[1,1'-biphenyl]-2-yl)phosphine (BrettPhos) |  | 26%   |
| 17 | 2-(2-(Dicyclohexylphosphino)phenyl)-1-methyl-1 <i>H</i> -indole (CM-Phos)                   |  | trace |

|    |                                                                           |                                                                                    |       |
|----|---------------------------------------------------------------------------|------------------------------------------------------------------------------------|-------|
| 18 | 2-(Dicyclohexylphosphino)-1-phenylindole<br>(cataCXium®PinCy)             | 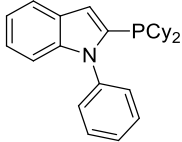 | trace |
| 19 | 2-(Dicyclohexylphosphino)-1-phenyl-1 <i>H</i> -pyrrole<br>(cataCXium®PCy) |  | trace |
| 20 | Butyldi-1-adamantylphosphine<br>(cataCXium®A)                             |  | trace |
| 21 | Benzyl-di-1-adamantylphosphine<br>(cataCXium®ABn)                         |  | 6%    |
| 22 | <i>N</i> -[2-(Di-1-adamantylphosphino)phenyl]morpholine (MorDalPhos)      |  | 20%   |

<sup>a</sup>Reaction conditions: **1a** (0.20 mmol), **2a** (0.40 mmol), THF (totally around 1 mL), Pd(OAc)<sub>2</sub> (4 mol%), Ligand (8 mol%), under N<sub>2</sub> at 50 °C for 1 h; calibrated GC–FID yields are reported using dodecane as internal standard.



## 6. Characterization of products

### 4-Mesityl-1,2-dihydronaphthalene (Scheme 2, compound 3a)

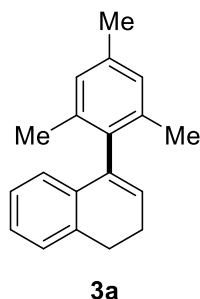

Compound **3a** was synthesized according to general procedure 4.3 (GP3). Pd(OAc)<sub>2</sub> (1.8 mg, 4 mol%), IPr•HCl (6.8 mg, 8 mol%), 3,4-dihydronaphthalen-1-yl dimethylcarbamate (43.5 mg, 0.20 mmol) and mesitylmagnesium bromide (0.40 mmol, in THF) were used.

Colorless liquid (46 mg, 93%). Eluents ( $R_f$  = 0.5, Hexane) was used for flash column chromatography. <sup>1</sup>H NMR (400 MHz, CDCl<sub>3</sub>)  $\delta$  2.12 (s, 6H), 2.35 (s, 3H), 2.44–2.49 (m, 2H), 2.91–2.95 (m, 2H), 5.86 (t,  $J$  = 4.5 Hz, 1H), 6.57–6.58 (m, 1H), 6.93–6.96 (m, 2H), 7.02–7.05 (m, 1H), 7.12–7.16 (m, 1H), 7.19–7.21 (m, 1H); <sup>13</sup>C NMR (100 MHz, CDCl<sub>3</sub>)  $\delta$  19.9, 21.0, 23.4, 28.2, 124.0, 126.5, 126.8, 127.4, 127.5, 128.0, 134.8, 136.1, 136.3, 136.7, 137.5. HRMS (APPI): calcd. for C<sub>19</sub>H<sub>20</sub>: 248.1565, found 248.1561.

For the synthesis of compound **3a** of 1 mmol scale:

A Schlenk tube was charged with Teflon-coated magnetic stir bar, Pd(OAc)<sub>2</sub> (8.9 mg, 4 mol%) and IPr•HCl (34.0 mg, 8 mol%). Then the tube was evacuated and flushed with nitrogen (3 cycles). 3,4-Dihydronaphthalen-1-yl dimethylcarbamate (217 mg, 1.00 mmol) was added. Freshly distilled THF (1.30 mL) and followed by Grignard reagent (2.00 mmol, 0.74 M in THF) were added to the tube via syringe. The Schlenk tube was sealed and magnetically stirred at 50 °C for 4 h. When cooled down to room temperature, water was added and the mixture was extracted by ethyl acetate. The organic layer after extraction was combined. After removing the solvent, the residue was subjected to column chromatography isolation to afford **3a** (0.24 g, 96%).

**2'-Methyl-3,4-dihydro-1,1'-binaphthalene (Scheme 2, compound 3b)<sup>9</sup>**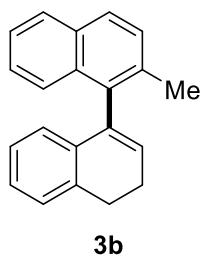

Compound **3b** was synthesized according to general procedure 4.3 (GP3). Pd(OAc)<sub>2</sub> (1.8 mg, 4 mol%), IPr•HCl (6.8 mg, 8 mol%), 3,4-dihydronaphthalen-1-yl dimethylcarbamate (46.3 mg, 0.20 mmol) and (2-methylnaphthalen-1-yl)magnesium bromide (0.40 mmol, in THF) were used.

White solid (52 mg, 96%). Eluents ( $R_f$  = 0.4, Hexane) was used for flash column chromatography. <sup>1</sup>H NMR (400 MHz, CDCl<sub>3</sub>)  $\delta$  2.37 (s, 3H), 2.58–2.64 (m, 2H), 3.05–3.10 (m, 2H), 6.03 (t,  $J$  = 4.5 Hz, 1H), 6.47 (d,  $J$  = 7.6 Hz, 1H), 6.95–6.99 (m, 1H), 7.14–7.18 (m, 1H), 7.26–7.28 (m, 1H), 7.36–7.46 (m, 3H), 7.80–7.82 (m, 2H), 7.86–7.88 (m, 1H); <sup>13</sup>C NMR (100 MHz, CDCl<sub>3</sub>)  $\delta$  20.2, 23.5, 28.2, 124.7, 124.7, 125.8, 126.0, 126.5, 126.9, 127.1, 127.5, 127.8, 128.6, 129.1, 132.1, 133.1, 133.8, 135.1, 135.9, 136.1, 136.6.

**9-Mesityl-6,7-dihydro-5H-benzo[7]annulene (Scheme 2, compound 3c)**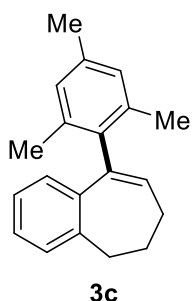

Compound **3c** was synthesized according to general procedure 4.3 (GP3). Pd(OAc)<sub>2</sub> (1.8 mg, 4 mol%), IPr•HCl (6.8 mg, 8 mol%), 6,7-dihydro-5H-benzo[7]annulen-9-yl dimethylcarbamate (46.3 mg, 0.20 mmol) and mesitylmagnesium bromide (0.40 mmol, in THF) were used.

White solid (45 mg, 86%). M.P.: 83.9–86.5 °C. Eluents ( $R_f$  = 0.5, Hexane) was used for flash column chromatography. <sup>1</sup>H NMR (400 MHz, CDCl<sub>3</sub>)  $\delta$  2.14 (s, 6H), 2.16–2.19 (m, 2H), 2.23–2.30 (m, 2H), 2.33 (s, 3H), 2.82–2.85 (m, 2H), 6.02 (t,  $J$  = 6.5 Hz, 1H), 6.74–6.76 (m, 1H), 6.90–6.93 (m, 2H), 7.07–7.11 (m, 1H), 7.13–7.17 (m, 1H), 7.24–7.26 (m, 1H); <sup>13</sup>C NMR (100 MHz, CDCl<sub>3</sub>)  $\delta$  20.4, 21.0, 26.2, 33.5, 34.7, 125.9, 126.5, 127.6, 128.2, 128.9, 131.2, 136.1, 136.6, 140.0, 140.3, 140.7, 141.8. HRMS (APPI): calcd. for C<sub>20</sub>H<sub>22</sub>: 262.1722, found

262.1717.

**9-(2,6-Dimethylphenyl)-6,7-dihydro-5H-benzo[7]annulene (Scheme 2, compound 3d)**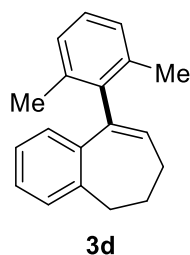

Compound **3d** was synthesized according to general procedure 4.3 (GP3). Pd(OAc)<sub>2</sub> (1.8 mg, 4 mol%), IPr•HCl (6.8 mg, 8 mol%), 6,7-dihydro-5H-benzo[7]annulen-9-yl dimethylcarbamate (46.3 mg, 0.20 mmol) and (2,6-dimethylphenyl)magnesium bromide bromide (0.40 mmol, in THF) were used.

White solid (36 mg, 72%). M.P.: 118.8–121.9 °C. Eluents (*R<sub>f</sub>* = 0.5, Hexane) was used for flash column chromatography. <sup>1</sup>H NMR (400 MHz, CDCl<sub>3</sub>) δ 2.17–2.21 (m, 8H), 2.24–2.30 (m, 2H), 2.83–2.86 (m, 2H), 6.02 (t, *J* = 6.5 Hz, 1H), 6.72–6.74 (m, 1H), 7.07–7.18 (m, 5H), 7.24–7.26 (m, 1H); <sup>13</sup>C NMR (100 MHz, CDCl<sub>3</sub>) δ 20.4, 26.4, 33.6, 34.5, 125.9, 126.6, 126.6, 127.4, 127.6, 129.0, 131.2, 136.7, 139.7, 140.7, 141.8, 143.1. HRMS (APPI): calcd. for C<sub>19</sub>H<sub>20</sub>: 248.1565, found 248.1559.

**(Z)-(1-(2-methoxyphenyl)ethene-1,2-diyl)dibenzene (Scheme 2, compound 3e)**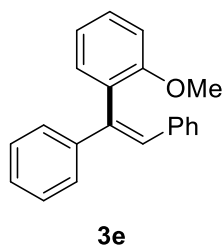

Compound **3e** was synthesized according to general procedure 4.3 (GP3). Pd(OAc)<sub>2</sub> (1.8 mg, 4 mol%), IMes•HCl (5.5 mg, 8 mol%), (Z)-1,2-diphenylvinyl dimethylcarbamate (53.5 mg, 0.20 mmol) and (2-methoxyphenyl)magnesium bromide (0.40 mmol, in THF) were used.

White solid (55 mg, 96%). M.P.: 64.9–66.3 °C. Eluents (*R<sub>f</sub>* = 0.5, Hexane/EA = 30:1) was used for flash column chromatography. GCMS indicated > 99:1 isomer ratio. <sup>1</sup>H NMR (400 MHz, CDCl<sub>3</sub>) δ 3.65 (s, 3H), 6.96–6.70 (m, 2H), 7.05–7.17 (m, 7H), 7.26–7.40 (m, 6H); <sup>13</sup>C NMR (100 MHz, CDCl<sub>3</sub>) δ 55.6, 111.6, 121.1, 126.5, 126.7, 127.2, 127.9, 128.1, 128.8, 128.9, 129.0, 129.2, 131.6, 137.6, 138.9, 142.8, 157.5. HRMS (APPI): calcd. for C<sub>21</sub>H<sub>18</sub>O: 286.1358, found 286.1353.

**(Z)-(1-(*o*-tolyl)ethene-1,2-diyl)dibenzene (Scheme 2, compound 3f)<sup>10</sup>**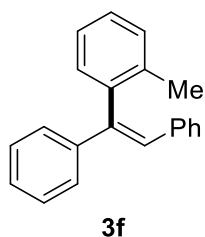

Compound **3f** was synthesized according to general procedure 4.3 (GP3). Pd(OAc)<sub>2</sub> (1.8 mg, 4 mol%), IMes•HCl (5.5 mg, 8 mol%), (Z)-1,2-diphenylvinyl dimethylcarbamate (53.5 mg, 0.20 mmol) and *o*-tolylmagnesium bromide (0.40 mmol, in THF) were used.

White solid (51 mg, 94%). Eluents (*R*<sub>f</sub> = 0.3, Hexane) was used for flash column chromatography. GCMS indicated > 99:1 isomer ratio. <sup>1</sup>H NMR (400 MHz, CDCl<sub>3</sub>) δ 2.07 (s, 3H), 6.97–6.99 (m, 2H), 7.10 (s, 1H), 7.11–7.16 (m, 4H), 7.23–7.36 (m, 8H); <sup>13</sup>C NMR (100 MHz, CDCl<sub>3</sub>) δ 19.6, 126.3, 126.6, 126.9, 127.3, 127.6, 128.1, 128.2, 128.3, 129.0, 130.2, 130.5, 136.6, 137.3, 139.6, 141.4, 142.3.

**(Z)-(1-Mesitylethene-1,2-diyl)dibenzene (Scheme 2, compound 3g)<sup>11</sup>**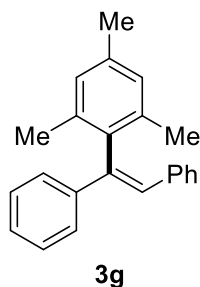

Compound **3g** was synthesized according to general procedure 4.3 (GP3). Pd(OAc)<sub>2</sub> (1.8 mg, 4 mol%), IMes•HCl (5.5 mg, 8 mol%), (Z)-1,2-diphenylvinyl dimethylcarbamate (53.5 mg, 0.20 mmol) and mesitylmagnesium bromide (0.40 mmol, in THF) were used.

White solid (57 mg, 95%). M.P.: 135.3–137.7 °C. Eluents (*R*<sub>f</sub> = 0.4, Hexane) was used for flash column chromatography. GCMS indicated > 99:1 isomer ratio. <sup>1</sup>H NMR (400 MHz, CDCl<sub>3</sub>) δ 2.04 (s, 6H), 2.38 (s, 3H), 6.96–7.00 (m, 4H), 7.13–7.18 (m, 4H), 7.25–7.38 (m, 5H); <sup>13</sup>C NMR (100 MHz, CDCl<sub>3</sub>) δ 19.8, 21.2, 126.0, 126.9, 127.3, 128.1, 128.2, 128.4, 128.7, 135.9, 136.0, 136.9, 137.5, 139.8, 141.5. HRMS (APPI): calcd. for C<sub>23</sub>H<sub>22</sub>: 298.1722, found 298.1717.

**(Z)-1-(1,2-diphenylvinyl)-2-methylnaphthalene (Scheme 2, compound 3h)**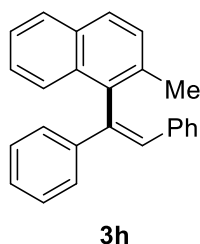

Compound **3h** was synthesized according to general procedure 4.3 (GP3). Pd(OAc)<sub>2</sub> (1.8 mg, 4 mol%), IMes•HCl (5.5 mg, 8 mol%), (Z)-1,2-diphenylvinyl dimethylcarbamate (53.5 mg, 0.20 mmol) and (2-methylnaphthalen-1-yl)magnesium bromide (0.40 mmol, in THF) were used.

Colorless liquid (60 mg, 94%). Eluents (*R*<sub>f</sub> = 0.35, Hexane) was used for flash column chromatography. GCMS indicated 98:2 isomer ratio. <sup>1</sup>H NMR (400 MHz, CDCl<sub>3</sub>) δ 2.24 (s, 3H), 6.85–6.87 (m, 2H), 7.00–7.04 (m, 3H), 7.24–7.42 (m, 9H), 7.81–7.87 (m, 3H); <sup>13</sup>C NMR (100 MHz, CDCl<sub>3</sub>) δ 20.1, 125.0, 125.7, 126.2, 126.4, 127.0, 127.4, 127.7, 128.0, 128.1, 128.5, 128.5, 129.0, 129.7, 132.1, 132.4, 133.6, 135.5, 137.1, 138.6, 141.8. HRMS (APPI): calcd. for C<sub>25</sub>H<sub>20</sub>: 320.1565, found 320.1561.

**(Z)-1-methyl-2-(1-phenylprop-1-en-1-yl)benzene (Scheme 2, compound 3i)<sup>12</sup>**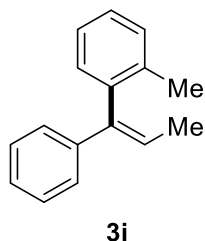

Compound **3i** was synthesized according to general procedure 4.3 (GP3). Pd(OAc)<sub>2</sub> (1.8 mg, 4 mol%), IMes•HCl (5.5 mg, 8 mol%), (Z)-1-phenylprop-1-en-1-yl dimethylcarbamate (41.1 mg, 0.20 mmol) and *o*-tolylmagnesium bromide (0.40 mmol, in THF) were used.

Colorless liquid (32 mg, 77%). Eluents (*R*<sub>f</sub> = 0.45, Hexane) was used for flash column chromatography. GCMS indicated > 99:1 isomer ratio. <sup>1</sup>H NMR (400 MHz, CDCl<sub>3</sub>) δ 1.66 (d, *J* = 6.9 Hz, 3H), 2.14 (s, 3H), 6.33–6.39 (m, 1H), 7.14–7.15 (m, 1H), 7.23–7.32 (m, 8H); <sup>13</sup>C NMR (100 MHz, CDCl<sub>3</sub>) δ 15.4, 19.5, 123.8, 125.7, 126.0, 126.6, 127.1, 128.2, 130.0, 130.1, 136.6, 139.2, 141.4, 141.5.

**(Z)-9-(1-phenylprop-1-en-1-yl)phenanthrene (Scheme 2, compound 3j)**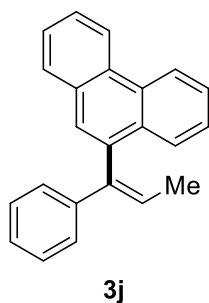

Compound **3j** was synthesized according to general procedure 4.3 (GP3). Pd(OAc)<sub>2</sub> (1.8 mg, 4 mol%), IMes•HCl (5.5 mg, 8 mol%), (Z)-1-phenylprop-1-en-1-yl dimethylcarbamate (41.1 mg, 0.20 mmol) and phenanthren-9-ylmagnesium bromide (0.40 mmol, in THF) were used. White solid (32 mg, 54%). M.P.: 141.5–143.6 °C. Eluents (*R<sub>f</sub>* = 0.4, Hexane/DCM = 19:1) was used for flash column chromatography. GCMS indicated 94:6 isomer ratio. <sup>1</sup>H NMR (400 MHz, CDCl<sub>3</sub>) δ 1.68 (d, *J* = 6.9 Hz, 3H), 6.64 (q, *J* = 6.9 Hz, 1H), 7.19–7.27 (m, 3H), 7.35–7.37 (m, 2H), 7.50–7.54 (m, 1H), 7.63–7.72 (m, 4H), 7.90–7.92 (m, 2H), 8.76–8.80 (m, 2H); <sup>13</sup>C NMR (100 MHz, CDCl<sub>3</sub>) δ 15.8, 122.6, 122.8, 125.8, 126.1, 126.4, 126.5, 126.7, 126.7, 126.8, 128.0, 128.3, 128.5, 130.1, 130.6, 131.2, 131.8, 136.1, 140.3, 141.7. HRMS (APPI): calcd. for C<sub>23</sub>H<sub>18</sub>: 294.1409, found 294.1404.

**4-(*o*-Tolyl)-1,2-dihydronaphthalene (Scheme 3, compound 6a)<sup>13</sup>**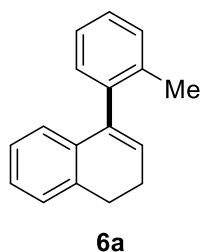

Compound **6a** was synthesized according to general procedure 4.3 (GP3). Pd(OAc)<sub>2</sub> (1.8 mg, 4 mol%), IMes•HCl (5.5 mg, 8 mol%), 3,4-dihydronaphthalen-1-yl dimethylcarbamate (43.5 mg, 0.20 mmol) and *o*-tolylmagnesium bromide (0.40 mmol, in THF) were used. Colorless liquid (40 mg, 91%). Eluents (*R<sub>f</sub>* = 0.4, Hexane) was used for flash column chromatography. <sup>1</sup>H NMR (400 MHz, CDCl<sub>3</sub>) δ 2.16 (s, 3H), 2.45–2.51 (m, 2H), 2.91–2.98 (m, 2H), 5.99 (t, *J* = 4.5 Hz, 1H), 6.68 (d, *J* = 7.5 Hz, 1H), 7.07–7.11 (m, 1H), 7.15–7.19 (m, 1H), 7.22–7.32 (m, 5H); <sup>13</sup>C NMR (100 MHz, CDCl<sub>3</sub>) δ 19.8, 23.4, 28.1, 124.8, 125.7, 126.4, 126.8, 127.2, 127.4, 127.6, 129.8, 130.0, 135.2, 135.8, 136.5, 139.4, 140.4.

**9-(3-Fluorophenyl)-6,7-dihydro-5H-benzo[7]annulene (Scheme 3, compound 6b)**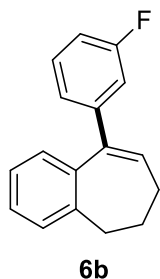

Compound **6b** was synthesized according to general procedure 4.3 (GP3). Pd(OAc)<sub>2</sub> (1.8 mg, 4 mol%), IMes•HCl (5.5 mg, 8 mol%), 6,7-dihydro-5H-benzo[7]annulen-9-yl dimethylcarbamate (46.3 mg, 0.20 mmol) and (3-fluorophenyl)magnesium bromide (0.40 mmol, in THF) were used.

Colorless liquid (45 mg, 94%). Eluents ( $R_f$  = 0.5, Hexane) was used for flash column chromatography. <sup>1</sup>H NMR (400 MHz, CDCl<sub>3</sub>)  $\delta$  1.97–2.02 (m, 2H), 2.16–2.23 (m, 2H), 2.65–2.68 (m, 2H), 6.49 (t,  $J$  = 7.4 Hz, 1H), 6.94–7.07 (m, 4H), 7.19–7.30 (m, 4H); <sup>19</sup>F NMR (376 MHz, CDCl<sub>3</sub>)  $\delta$  –113.9; <sup>13</sup>C NMR (100 MHz, CDCl<sub>3</sub>)  $\delta$  25.3, 32.3, 35.1, 113.7 (d,  $J$  = 21.2 Hz), 114.7 (d,  $J$  = 21.5 Hz), 123.6 (d,  $J$  = 2.5 Hz), 125.9, 127.3, 128.6, 129.1, 129.4, 129.4 (d,  $J$  = 8.5 Hz), 139.6, 142.0, 142.1, 144.6 (d,  $J$  = 7.5 Hz), 162.8 (d,  $J$  = 243.4 Hz). HRMS (APPI): calcd. for C<sub>17</sub>H<sub>15</sub>F: 238.1158, found 238.1151.

**9-(2-Methoxyphenyl)-6,7-dihydro-5H-benzo[7]annulene (Scheme 3, compound 6c)**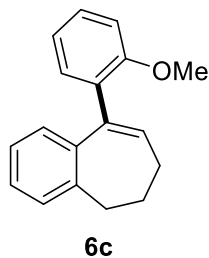

Compound **6c** was synthesized according to general procedure 4.3 (GP3). Pd(OAc)<sub>2</sub> (1.8 mg, 4 mol%), IMes•HCl (5.5 mg, 8 mol%), 6,7-dihydro-5H-benzo[7]annulen-9-yl dimethylcarbamate (46.3 mg, 0.20 mmol) and (2-methoxyphenyl)magnesium bromide (0.40 mmol, in THF) were used.

White solid (48 mg, 95%). M.P.: 72.7–74.8 °C. Eluents ( $R_f$  = 0.5, Hexane/EA = 30:1) was used for flash column chromatography. <sup>1</sup>H NMR (400 MHz, CDCl<sub>3</sub>)  $\delta$  2.02–2.07 (m, 2H), 2.19–2.26 (m, 2H), 2.79–2.82 (m, 2H), 3.58 (s, 3H), 6.29 (t,  $J$  = 7.1 Hz, 1H), 6.87–6.90 (m, 2H), 6.96–7.00 (m, 1H), 7.10–7.19 (m, 2H), 7.24–7.31 (m, 3H); <sup>13</sup>C NMR (100 MHz, CDCl<sub>3</sub>)  $\delta$  25.3, 32.3, 35.0, 55.6, 111.4, 120.4, 125.5, 126.3, 127.4, 128.3, 128.3, 129.9, 131.1, 132.6,

140.5, 141.2, 141.6, 157.3. HRMS (ESI): calcd. for  $C_{18}H_{18}O$ : 250.1358, found 250.1353.

### 1,2-Di(naphthalen-2-yl)cyclohex-1-ene (Scheme 3, compound 6d)

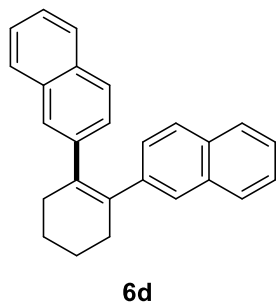

Compound **6d** was synthesized according to general procedure 4.3 (GP3).  $Pd(OAc)_2$  (1.8 mg, 4 mol%),  $IMes \cdot HCl$  (5.5 mg, 8 mol%), 2-(naphthalen-2-yl)cyclohex-1-en-1-yl dimethylcarbamate (59.1 mg, 0.20 mmol) and naphthalen-2-ylmagnesium bromide (0.40 mmol, in THF) were used.

White solid (50 mg, 75%). M.P.: 103.2–105.4 °C. Eluents ( $R_f$  = 0.3, Hexane) was used for flash column chromatography.  $^1H$  NMR (400 MHz,  $CDCl_3$ )  $\delta$  1.94–1.98 (m, 4H), 2.64–2.67 (m, 4H), 7.12–7.14 (m, 2H), 7.35–7.40 (m, 4H), 7.48–7.50 (m, 2H), 7.63–7.69 (m, 6H);  $^{13}C$  NMR (100 MHz,  $CDCl_3$ )  $\delta$  23.4, 32.2, 125.2, 125.5, 126.9, 127.2, 127.4, 127.7, 128.2, 131.8, 133.2, 135.3, 141.4. HRMS (APPI): calcd. For  $C_{26}H_{22}$ : 334.1722, found 334.1716.

### (Z)-(1-(3,5-dimethylphenyl)ethene-1,2-diyl)dibenzene (Scheme 3, compound 6e)

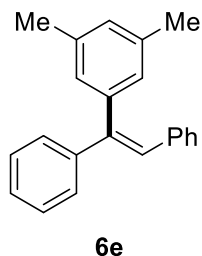

Compound **6e** was synthesized according to general procedure 4.3 (GP3).  $Pd(OAc)_2$  (1.8 mg, 4 mol%),  $IMes \cdot HCl$  (5.5 mg, 8 mol%), (Z)-1,2-diphenylvinyl dimethylcarbamate (53.5 mg, 0.20 mmol) and (3,5-dimethylphenyl)magnesium bromide (0.40 mmol, in THF) were used.

White solid (47 mg, 83%). M.P.: 122.4–123.8 °C. Eluents ( $R_f$  = 0.3, Hexane) was used for flash column chromatography. GCMS indicated > 99:1 isomer ratio.  $^1H$  NMR (400 MHz,  $CDCl_3$ )  $\delta$  2.31 (s, 6H), 6.88–6.90 (m, 2H), 6.98 (s, 1H), 7.01 (s, 1H), 7.10–7.21 (m, 5H), 7.30–7.41 (m, 5H);  $^{13}C$  NMR (100 MHz,  $CDCl_3$ )  $\delta$  21.3, 126.6, 127.3, 127.5, 127.8, 127.8, 127.9, 128.1, 129.0, 129.5, 137.4, 138.0, 140.2, 142.7, 143.6. HRMS (APPI): calcd. for  $C_{22}H_{20}$ : 284.1565, found 284.1561.



**(Z)-1-methoxy-4-(1-phenylprop-1-en-1-yl)benzene (Scheme 3, compound 6f)<sup>14</sup>**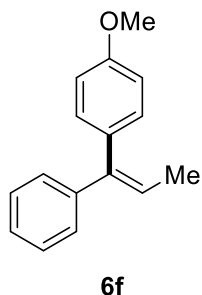

Compound **6f** was synthesized according to general procedure 4.3 (GP3). Pd(OAc)<sub>2</sub> (1.8 mg, 4 mol%), IMes•HCl (5.5 mg, 8 mol%), (Z)-1-phenylprop-1-en-1-yl dimethylcarbamate (41.1 mg, 0.20 mmol) and (4-methoxyphenyl)magnesium bromide (0.40 mmol, in THF) were used. Colorless liquid (43 mg, 95%). Eluents ( $R_f$  = 0.5, Hexane/EA = 19:1) was used for flash column chromatography. GCMS indicated > 99:1 isomer ratio. <sup>1</sup>H NMR (400 MHz, CDCl<sub>3</sub>)  $\delta$  1.81 (d,  $J$  = 7.0 Hz, 3H), 3.86 (s, 3H), 6.13–6.18 (m, 1H), 6.93–6.95 (m, 2H), 7.13–7.15 (m, 2H), 7.21–7.30 (m, 5H); <sup>13</sup>C NMR (100 MHz, CDCl<sub>3</sub>)  $\delta$  15.7, 55.2, 113.5, 123.8, 126.6, 127.3, 128.0, 131.2, 132.3, 142.1, 143.4, 158.5.

**4-(*p*-Tolyl)-2H-chromen-2-one (Scheme 3, compound 6g)<sup>15</sup>**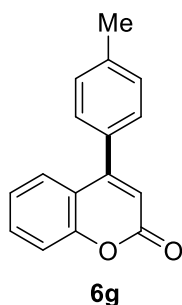

Compound **6g** was synthesized according to general procedure 4.3 (GP3). Pd(OAc)<sub>2</sub> (1.8 mg, 4 mol%), IMes•HCl (5.5 mg, 8 mol%), NaOtBu (3.1 mg, 16 mol%), 2-oxo-2H-chromen-4-yl dimethylcarbamate (46.6 mg, 0.20 mmol) and *p*-tolylzinc reagent (0.40 mmol, in THF) were used.

White solid (42 mg, 89%). Eluents ( $R_f$  = 0.5, Hexane/EA = 4:1) was used for flash column chromatography. <sup>1</sup>H NMR (400 MHz, CDCl<sub>3</sub>)  $\delta$  2.45 (s, 3H), 6.36 (s, 1H), 7.20–7.24 (m, 1H), 7.31–7.41 (m, 5H), 7.51–7.56 (m, 2H); <sup>13</sup>C NMR (100 MHz, CDCl<sub>3</sub>)  $\delta$  21.3, 114.9, 117.2, 119.0, 124.0, 127.0, 128.4, 129.5, 131.8, 132.3, 139.9, 154.2, 155.7, 160.8.

**1-Methyl-4-(*p*-tolyl)quinolin-2(1*H*)-one (Scheme 3, compound **6h**)<sup>16</sup>**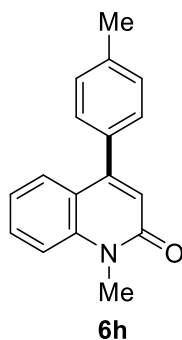

Compound **6h** was synthesized according to general procedure 4.3 (GP3). Pd(OAc)<sub>2</sub> (1.8 mg, 4 mol%), IMes•HCl (5.5 mg, 8 mol%), 1-methyl-2-oxo-1,2-dihydroquinolin-4-yl dimethylcarbamate (49.3 mg, 0.20 mmol) and *p*-tolylmagnesium bromide (0.40 mmol, in THF) were used.

Colorless liquid (39 mg, 78%). Eluents (*R*<sub>f</sub> = 0.5, DCM/EA = 3:1) was used for flash column chromatography. <sup>1</sup>H NMR (400 MHz, CDCl<sub>3</sub>) δ 2.44 (s, 3H), 3.77 (s, 3H), 6.67 (s, 1H), 7.14–7.18 (m, 1H), 7.28–7.32 (m, 4H), 7.41–7.43 (m, 1H), 7.55–7.60 (m, 2H); <sup>13</sup>C NMR (100 MHz, CDCl<sub>3</sub>) δ 21.2, 29.4, 114.3, 120.5, 121.0, 121.8, 127.7, 128.8, 129.2, 130.5, 134.1, 138.5, 140.2, 150.9, 161.9.

**4-(Cyclohept-1-en-1-yl)-1,1'-biphenyl (Scheme 3, compound **6i**)<sup>17</sup>**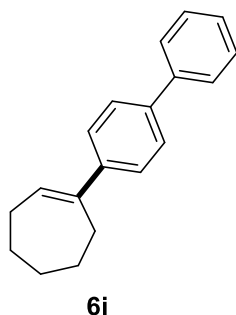

Compound **6i** was synthesized according to general procedure 4.3 (GP3). Pd(OAc)<sub>2</sub> (1.8 mg, 4 mol%), IMes•HCl (5.5 mg, 8 mol%), cyclohept-1-en-1-yl dimethylcarbamate (36.7 mg, 0.20 mmol) and [1,1'-biphenyl]-4-ylmagnesium bromide (0.40 mmol, in THF) were used.

White solid (45 mg, 90%). Eluents (*R*<sub>f</sub> = 0.5, Hexane/DCM = 19:1) was used for flash column chromatography. <sup>1</sup>H NMR (400 MHz, CDCl<sub>3</sub>) δ 1.60–1.64 (m, 2H), 1.70–1.74 (m, 2H), 1.87–1.91 (m, 2H), 2.34–2.38 (m, 2H), 2.68–2.70 (m, 2H), 6.21 (t, *J* = 6.7 Hz, 1H), 7.35–7.38 (m, 1H), 7.43–7.50 (m, 4H), 7.56–7.58 (m, 2H), 7.63–7.65 (m, 2H); <sup>13</sup>C NMR (100 MHz, CDCl<sub>3</sub>) δ 26.8, 26.9, 28.9, 32.6, 32.8, 126.0, 126.8, 126.9, 127.0, 128.7, 130.5, 139.1, 140.9, 143.8, 144.5.

**1-(3-Methoxyphenyl)cyclohept-1-ene (Scheme 3, compound 6j)<sup>18</sup>**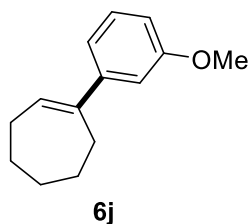

Compound **6j** was synthesized according to general procedure 4.3 (GP3). Pd(OAc)<sub>2</sub> (1.8 mg, 4 mol%), IMes•HCl (5.5 mg, 8 mol%), cyclohept-1-en-1-yl dimethylcarbamate (36.7 mg, 0.20 mmol) and (3-methoxyphenyl)magnesium bromide (0.40 mmol, in THF) were used.

Colorless liquid (40 mg, 98%). Eluents ( $R_f$  = 0.5, Hexane/EA = 9:1) was used for flash column chromatography. <sup>1</sup>H NMR (400 MHz, CDCl<sub>3</sub>)  $\delta$  1.55–1.61 (m, 2H), 1.64–1.69 (m, 2H), 1.83–1.89 (m, 2H), 2.29–2.33 (m, 2H), 2.61–2.64 (m, 2H), 3.83 (s, 3H), 6.13 (t,  $J$  = 6.7 Hz, 1H), 6.77–6.79 (m, 1H), 6.88–6.90 (m, 1H), 6.93–6.95 (m, 1H), 7.21–7.23 (m, 1H); <sup>13</sup>C NMR (100 MHz, CDCl<sub>3</sub>)  $\delta$  26.7, 26.9, 28.8, 32.7, 32.8, 55.1, 111.5, 111.5, 118.2, 129.0, 130.5, 144.8, 146.5, 159.4.

**4'-Methoxy-2,3,4,5-tetrahydro-1,1'-biphenyl (Scheme 3, compound 6k)<sup>19</sup>**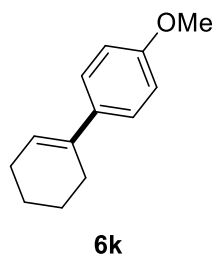

Compound **6k** was synthesized according to general procedure 4.3 (GP3). Pd(OAc)<sub>2</sub> (1.8 mg, 4 mol%), IMes•HCl (5.5 mg, 8 mol%), cyclohex-1-en-1-yl dimethylcarbamate (33.8 mg, 0.20 mmol) and (4-methoxyphenyl)magnesium bromide (0.40 mmol, in THF) were used.

White solid (32 mg, 85%). Eluents ( $R_f$  = 0.5, Hexane/EA = 9:1) was used for flash column chromatography. <sup>1</sup>H NMR (400 MHz, CDCl<sub>3</sub>)  $\delta$  1.64–1.70 (m, 2H), 1.76–1.82 (m, 2H), 2.20–2.22 (m, 2H), 2.38–2.41 (m, 2H), 3.81 (s, 3H), 6.03–6.06 (m, 1H), 6.85–6.87 (m, 2H), 7.32–7.34 (m, 2H); <sup>13</sup>C NMR (100 MHz, CDCl<sub>3</sub>)  $\delta$  22.2, 23.1, 25.8, 27.4, 55.2, 113.5, 123.1, 125.9, 135.3, 135.9, 158.4.

***N,N*-dimethyl-2',3',4',5'-tetrahydro-[1,1'-biphenyl]-4-amine (Scheme 3, compound 6l)<sup>20</sup>**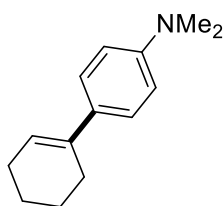**6l**

Compound **6l** was synthesized according to general procedure 4.3 (GP3). Pd(OAc)<sub>2</sub> (1.8 mg, 4 mol%), IMes•HCl (5.5 mg, 8 mol%), cyclohex-1-en-1-yl dimethylcarbamate (33.8 mg, 0.20 mmol) and (4-(dimethylamino)phenyl)magnesium bromide (0.40 mmol, in THF) were used. Pale yellow solid (33 mg, 82%). Eluents (*R*<sub>f</sub> = 0.4, Hexane/EA = 19:1) was used for flash column chromatography. <sup>1</sup>H NMR (400 MHz, CDCl<sub>3</sub>) δ 1.64–1.70 (m, 2H), 1.77–1.82 (m, 2H), 2.19–2.24 (m, 2H), 2.39–2.43 (m, 2H), 2.96 (s, 6H), 6.02–6.04 (m, 1H), 6.71–6.74 (m, 2H), 7.30–7.34 (m, 2H); <sup>13</sup>C NMR (100 MHz, CDCl<sub>3</sub>) δ 22.3, 23.2, 25.8, 27.3, 40.7, 112.5, 121.5, 125.5, 131.2, 135.9, 149.5.

**3-(4-Fluorophenyl)-1,2-dihydronaphthalene (Scheme 3, compound 6m)<sup>6</sup>**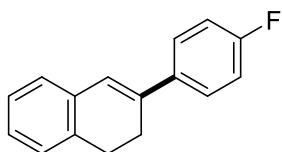**6m**

Compound **6m** was synthesized according to general procedure 4.3 (GP3). Pd(OAc)<sub>2</sub> (1.8 mg, 4 mol%), IMes•HCl (5.5 mg, 8 mol%), 3,4-dihydronaphthalen-2-yl dimethylcarbamate (43.5 mg, 0.20 mmol) and (4-fluorophenyl)magnesium bromide (0.40 mmol, in THF) were used. White solid (42 mg, 93%). Eluents (*R*<sub>f</sub> = 0.4, Hexane) was used for flash column chromatography. <sup>1</sup>H NMR (400 MHz, CDCl<sub>3</sub>) δ 2.71–2.75 (m, 2H), 2.95–2.99 (m, 2H), 6.80 (s, 1H), 7.04–7.10 (m, 2H), 7.13–7.22 (m, 4H), 7.49–7.54 (m, 2H); <sup>19</sup>F NMR (376 MHz, CDCl<sub>3</sub>) δ –114.9; <sup>13</sup>C NMR (100 MHz, CDCl<sub>3</sub>) δ 26.4, 28.1, 115.3 (d, *J* = 21.2 Hz), 124.1, 124.2, 126.6 (d, *J* = 8.1 Hz), 126.64, 126.7, 127.0, 127.2, 134.6, 137.2 (d, *J* = 3.3 Hz), 137.6, 162.2 (d, *J* = 245.3 Hz).

Alkenyl pivalate as electrophile: according to general procedure 4.3 (GP3). Pd(OAc)<sub>2</sub> (1.8 mg, 4 mol%), IMes•HCl (5.5 mg, 8 mol%), 3,4-Dihydronaphthalen-2-yl pivalate<sup>21</sup> (46.0 mg, 0.20 mmol) and (4-fluorophenyl)magnesium bromide (0.40 mmol, in THF) were used to afford **6m** as white solid (42 mg, 93%).

**3-(3,4-Dihydronaphthalen-2-yl)benzo[*b*]thiophene (Scheme 3, compound **6n**)<sup>22</sup>**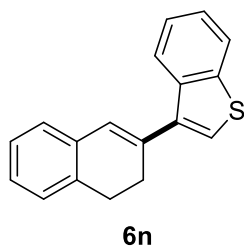

Compound **6n** was synthesized according to general procedure 4.3 (GP3). Pd(OAc)<sub>2</sub> (1.8 mg, 4 mol%), IMes•HCl (5.5 mg, 8 mol%), 3,4-dihydronaphthalen-2-yl dimethylcarbamate (43.5 mg, 0.20 mmol) and benzo[*b*]thiophen-3-ylmagnesium bromide (0.40 mmol, in THF) were used.

White solid (30 mg, 57%). Eluents (*R*<sub>f</sub> = 0.2, Hexane) was used for flash column chromatography. <sup>1</sup>H NMR (400 MHz, CDCl<sub>3</sub>) δ 2.84 (t, *J* = 8.2 Hz, 2H), 3.04 (t, *J* = 8.2 Hz, 2H), 6.92 (s, 1H), 7.16–7.24 (m, 4H), 7.39–7.47 (m, 3H), 7.92 (d, *J* = 2.0 Hz, 1H), 8.09 (d, *J* = 2.0 Hz, 1H); <sup>13</sup>C NMR (100 MHz, CDCl<sub>3</sub>) δ 28.2, 28.4, 122.3, 123.0, 123.4, 124.2, 124.3, 126.0, 126.5, 126.6, 127.0, 127.4, 134.4, 134.4, 134.8, 137.4, 138.6, 140.7.

**3-(*p*-Tolyl)-1,2-dihydronaphthalene (Scheme 3, compound **6o**)<sup>6</sup>**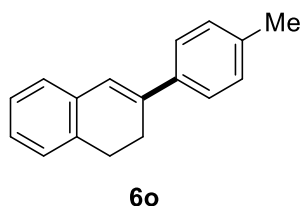

A Schlenk tube was charged with Teflon-coated magnetic stir bar, Pd(OAc)<sub>2</sub> (2.2 mg) and IMes•HCl (6.8 mg), and then was evacuated and flushed with nitrogen (3 cycles). Freshly distilled THF (5.00 mL) was added by a syringe and the mixture was stirred at room temperature for 10 min to afford the stock solution (0.50 mol% of Pd / 0.50 mL). To another Schlenk tube was added 3,4-dihydronaphthalen-2-yl dimethylcarbamate (43.5 mg, 0.20 mmol). This tube was evacuated and flushed with nitrogen (3 cycles). Stock solution (0.50 mL, 0.50 mol% of Pd) was transferred to this Schlenk tube followed by the addition of *p*-tolylmagnesium bromide (0.40 mmol, in THF). The mixture was stirred at room temperature for 1 h. According to general procedure 4.3 (GP3), the following work-up afforded the product **6o** as a white solid (41 mg, 93%). *R*<sub>f</sub> = 0.55 (Hexane). <sup>1</sup>H NMR (400 MHz, CDCl<sub>3</sub>) δ 2.42 (s, 3H), 2.79 (t, *J* = 8.1 Hz, 2H), 3.00 (t, *J* = 8.1 Hz, 2H), 6.88 (s, 1H), 7.16–7.26 (m, 6H), 7.49–7.51 (m, 2H); <sup>13</sup>C NMR (100 MHz, CDCl<sub>3</sub>) δ 21.1, 26.3, 28.2, 123.5, 125.0, 126.4, 126.5, 126.7, 127.1, 129.1, 134.7, 134.8, 137.1, 138.1, 138.5.

**3-(4-(*tert*-Butyl)phenyl)-1,2-dihydronaphthalene (Scheme 3, compound 6p)<sup>6</sup>**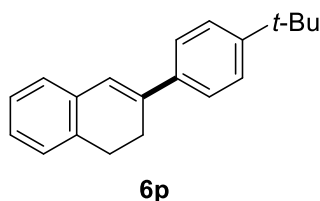

A Schlenk tube was charged with Teflon-coated magnetic stir bar, Pd(OAc)<sub>2</sub> (2.2 mg) and IMes•HCl (6.8 mg), and then was evacuated and flushed with nitrogen (3 cycles). Freshly distilled THF (5.00 mL) was added by a syringe and the mixture was stirred at room temperature for 10 min to afford the stock solution (0.50 mol% of Pd / 0.50 mL). To another Schlenk tube was added 3,4-dihydronaphthalen-2-yl dimethylcarbamate (43.5 mg, 0.20 mmol). This tube was evacuated and flushed with nitrogen (3 cycles). Upper clean stock solution (0.50 mL, 0.50 mol% of Pd) was transferred to this Schlenk tube followed by the addition of (4-(*tert*-butyl)phenyl)magnesium bromide (0.4 mmol, in THF). The mixture was stirred at room temperature for 1 h. According to general procedure 4.3 (GP3), the following work-up afforded the product **6p** as a white solid (49 mg, 93%). *R*<sub>f</sub> = 0.35 (Hexane). <sup>1</sup>H NMR (400 MHz, CDCl<sub>3</sub>) δ 1.39 (s, 9H), 2.79 (t, *J* = 8.0 Hz, 2H), 2.99 (t, *J* = 8.0 Hz, 2H), 6.90 (s, 1H), 7.16–7.26 (m, 4H), 7.44–7.46 (m, 2H), 7.54–7.56 (m, 2H); <sup>13</sup>C NMR (100 MHz, CDCl<sub>3</sub>) δ 26.2, 28.2, 31.3, 34.5, 123.6, 124.8, 125.4, 126.5, 126.5, 126.8, 127.2, 134.7, 134.9, 138.1, 138.4, 150.4.

**4-Hexyl-1,2-dihydronaphthalene (Scheme 4, compound 9a)<sup>23</sup>**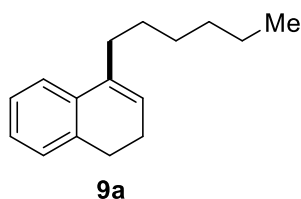

Compound **9a** was synthesized according to general procedure 4.3 (GP3). Pd(OAc)<sub>2</sub> (1.8 mg, 4 mol%), IMes•HCl (5.5 mg, 8 mol%), 3,4-dihydronaphthalen-1-yl dimethylcarbamate (43.5 mg, 0.20 mmol) and hexylmagnesium bromide (0.40 mmol, in THF) were used.

Colorless liquid (38 mg, 88%). Eluents (*R*<sub>f</sub> = 0.5, Hexane) was used for flash column chromatography. <sup>1</sup>H NMR (400 MHz, CDCl<sub>3</sub>) δ 0.91–0.94 (m, 3H), 1.30–1.43 (m, 6H), 1.52–1.59 (m, 2H), 2.24–2.29 (m, 2H), 2.43–2.48 (m, 2H), 2.74–2.78 (m, 2H), 5.87 (t, *J* = 4.5 Hz, 1H), 7.14–7.16 (m, 2H), 7.20–7.24 (m, 1H), 7.27–7.29 (m, 1H); <sup>13</sup>C NMR (100 MHz, CDCl<sub>3</sub>) δ 14.1, 22.7, 23.1, 28.4, 28.5, 29.3, 31.7, 32.8, 122.6, 124.5, 126.2, 126.4, 127.5, 135.1, 136.6, 136.8.

**((3,4-Dihydronaphthalen-1-yl)methyl)trimethylsilane (Scheme 4, compound 9b)<sup>24</sup>**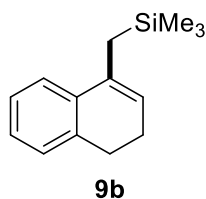

Compound **9b** was synthesized according to general procedure 4.3 (GP3). Pd(OAc)<sub>2</sub> (1.8 mg, 4 mol%), IMes•HCl (5.5 mg, 8 mol%), 3,4-dihydronaphthalen-1-yl dimethylcarbamate (43.5 mg, 0.20 mmol) and ((trimethylsilyl)methyl)magnesium chloride (0.40 mmol, in THF) were used.

Colorless liquid (34 mg, 79%). Eluents (*R*<sub>f</sub> = 0.5, Hexane) was used for flash column chromatography. <sup>1</sup>H NMR (400 MHz, CDCl<sub>3</sub>) δ 0.01 (s, 9H), 1.96 (s, 2H), 2.24–2.29 (m, 2H), 2.74–2.78 (m, 2H), 5.72 (t, *J* = 4.6 Hz, 1H), 7.12–7.25 (m, 4H); <sup>13</sup>C NMR (100 MHz, CDCl<sub>3</sub>) δ –1.1, 22.3, 23.2, 28.9, 122.7, 123.4, 125.9, 126.4, 127.3, 134.2, 135.8, 136.8.

**4-Cyclopropyl-1,2-dihydronaphthalene (Scheme 4, compound 9c)<sup>25</sup>**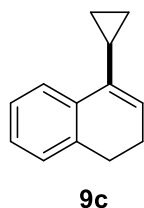

Compound **9c** was synthesized according to general procedure 4.3 (GP3). Pd(OAc)<sub>2</sub> (1.8 mg, 4 mol%), IMes•HCl (5.5 mg, 8 mol%), 3,4-dihydronaphthalen-1-yl dimethylcarbamate (43.5 mg, 0.20 mmol) and cyclopropylmagnesium bromide (0.40 mmol, in THF) were used.

Colorless liquid (24 mg, 70%). Eluents (*R*<sub>f</sub> = 0.5, Hexane) was used for flash column chromatography. <sup>1</sup>H NMR (400 MHz, CDCl<sub>3</sub>) δ 0.50–0.54 (m, 2H), 0.79–0.83 (m, 2H), 1.62–1.69 (m, 1H), 2.24–2.30 (m, 2H), 2.74–2.78 (m, 2H), 5.81–5.84 (m, 1H), 7.15–7.20 (m, 2H), 7.24–7.28 (m, 1H), 7.66–7.68 (m, 1H); <sup>13</sup>C NMR (100 MHz, CDCl<sub>3</sub>) δ 5.2, 13.1, 23.0, 28.1, 123.1, 123.2, 126.2, 126.6, 127.2, 135.9, 136.2, 137.5.

**3-Cyclopentyl-1,2-dihydronaphthalene (Scheme 4, compound 9d)**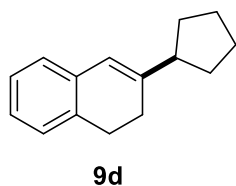

Compound **9d** was synthesized according to general procedure 4.3 (GP3). Pd(OAc)<sub>2</sub> (1.8 mg,

4 mol%), IMes•HCl (5.5 mg, 8 mol%), 3,4-dihydronaphthalen-2-yl dimethylcarbamate (43.5 mg, 0.20 mmol) and cyclopentylmagnesium bromide (0.40 mmol, in THF) were used. Colorless liquid (33 mg, 83%). Eluents ( $R_f$  = 0.6, Hexane) was used for flash column chromatography.  $^1\text{H}$  NMR (400 MHz,  $\text{CDCl}_3$ )  $\delta$  1.48–1.57 (m, 2H), 1.61–1.79 (m, 4H), 1.84–1.91 (m, 2H), 2.26–2.30 (m, 2H), 2.59–2.67 (m, 1H), 2.80–2.84 (m, 2H), 6.28 (s, 1H), 7.01–7.02 (m, 1H), 7.07–7.17 (m, 3H);  $^{13}\text{C}$  NMR (100 MHz,  $\text{CDCl}_3$ )  $\delta$  25.3, 25.9, 28.4, 31.0, 47.1, 120.3, 125.3, 125.9, 126.3, 127.0, 134.6, 135.1, 145.5. HRMS (APPI): calcd. for  $\text{C}_{15}\text{H}_{18}$ : 198.1409, found 198.1404.

### 3-Cyclohexyl-1,2-dihydronaphthalene (Scheme 4, compound **9e**)<sup>26</sup>

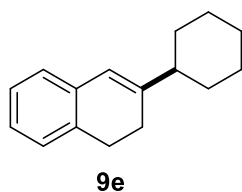

Compound **9e** was synthesized according to general procedure 4.3 (GP3).  $\text{Pd}(\text{OAc})_2$  (1.8 mg, 4 mol%), IMes•HCl (5.5 mg, 8 mol%), 3,4-dihydronaphthalen-2-yl dimethylcarbamate (43.5 mg, 0.20 mmol) and cyclohexylmagnesium chloride (0.40 mmol, in THF) were used. Colorless liquid (38 mg, 89%). Eluents ( $R_f$  = 0.6, Hexane) was used for flash column chromatography.  $^1\text{H}$  NMR (400 MHz,  $\text{CDCl}_3$ )  $\delta$  1.19–1.42 (m, 5H), 1.74–1.77 (m, 1H), 1.83–1.87 (m, 4H), 2.05–2.10 (m, 1H), 2.26–2.30 (m, 2H), 2.79–2.83 (m, 2H), 6.23 (s, 1H), 7.01–7.18 (m, 4H);  $^{13}\text{C}$  NMR (100 MHz,  $\text{CDCl}_3$ )  $\delta$  26.0, 26.4, 26.6, 28.4, 31.5, 45.4, 120.1, 125.4, 125.9, 126.3, 127.0, 134.7, 135.1, 147.5.

### 4-(prop-1-en-2-yl)-1,2-dihydronaphthalene (Scheme 4, compound **9f**)<sup>27</sup>

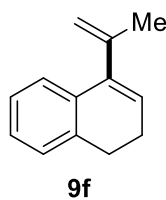

Compound **9f** was synthesized according to general procedure 4.3 (GP3).  $\text{Pd}(\text{OAc})_2$  (1.8 mg, 4 mol%), IMes•HCl (5.5 mg, 8 mol%), 3,4-dihydronaphthalen-1-yl dimethylcarbamate (43.5 mg, 0.20 mmol) and prop-1-en-2-ylmagnesium bromide (0.40 mmol, in THF) were used. Colorless liquid (21 mg, 62%). Eluents ( $R_f$  = 0.5, Hexane) was used for flash column chromatography.  $^1\text{H}$  NMR (400 MHz,  $\text{CDCl}_3$ )  $\delta$  1.98 (s, 3H), 2.26–2.30 (m, 2H), 2.74–2.78 (m, 2H), 5.03–5.05 (m, 1H), 5.10–5.12 (m, 1H), 6.00 (t,  $J$  = 4.7 Hz, 1H), 7.14–7.24 (m, 4H);



$^{13}\text{C}$  NMR (100 MHz,  $\text{CDCl}_3$ )  $\delta$  22.8, 23.1, 28.3, 114.4, 124.9, 125.1, 126.2, 126.7, 127.5, 133.9, 136.8, 141.5, 144.5.

**Tamoxifen, (Z)-2-(4-(1,2-diphenylbut-1-en-1-yl)phenoxy)-N,N-dimethylethan-1-amine (Scheme 6, compound 11a)**

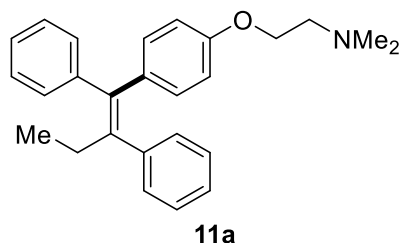

To a dry Schlenk tube was charged with Teflon-coated magnetic stir bar (5 mm  $\times$  10 mm),  $\text{Pd}(\text{OAc})_2$  (4.5 mg, 10 mol%),  $\text{IMes} \cdot \text{HCl}$  (13.6 mg, 20 mol%) and (Z)-1,2-diphenylbut-1-en-1-yl dimethylcarbamate **10a** (59.1 mg, 0.20 mmol). Then the tube was evacuated and flushed with nitrogen (3 cycles). The freshly distilled THF (0.40 mL) was added followed by the addition of (4-(2-(dimethylamino)ethoxy)phenyl)magnesium bromide<sup>28</sup> (0.40 mmol, in THF). The Schlenk tube was sealed and magnetically stirred at oil bath (50  $^\circ\text{C}$ ) for 24 h. When cooled down to room temperature, water ( $\sim$ 4 mL) were added to quench the reaction, the mixture was extracted with EA and the organic layer was combined. After removing the solvent, the residue was subjected to column chromatography ( $\text{DCM}/\text{MeOH} = 96:4$ )<sup>29</sup> to afford (Z)-Tamoxifen **11a** (46 mg, 62%), 99% (Z)-isomer.

$^1\text{H}$  NMR (400 MHz,  $\text{CDCl}_3$ )  $\delta$  0.93 (t,  $J = 7.4$  Hz, 3H), 2.29 (s, 6H), 2.46 (q,  $J = 7.4$  Hz, 2H), 2.66 (t,  $J = 5.8$  Hz, 2H), 3.94 (t,  $J = 5.8$  Hz, 2H), 6.57 (q,  $J = 8.7$  Hz, 2H), 6.78 (q,  $J = 8.7$  Hz, 2H), 7.09–7.20 (m, 5H), 7.24–7.29 (m, 3H), 7.33–7.37 (m, 2H);  $^{13}\text{C}$  NMR (100 MHz,  $\text{CDCl}_3$ )  $\delta$  13.6, 29.0, 45.8, 58.2, 65.6, 113.3, 126.0, 126.5, 127.8, 128.0, 129.4, 129.7, 131.8, 135.5, 138.2, 141.3, 142.4, 143.8, 156.7. The spectral data is in accordance with literature.<sup>30</sup>

**(E)-Tamoxifen, (E)-2-(4-(1,2-diphenylbut-1-en-1-yl)phenoxy)-N,N-dimethylethan-1-amine (Scheme 6, compound 11b)**

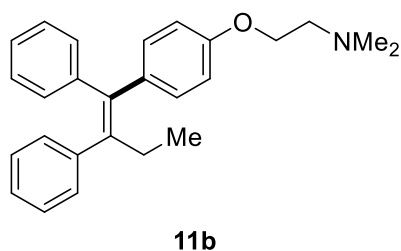

To a dry Schlenk tube was charged with Teflon-coated magnetic stir bar (5 mm × 10 mm), Pd(OAc)<sub>2</sub> (1.8 mg, 4 mol%), IMes•HCl (5.5 mg, 8 mol%) and (*E*)-1,2-diphenylbut-1-en-1-yl dimethylcarbamate **10b** (59.1 mg, 0.20 mmol). Then the tube was evacuated and flushed with nitrogen (3 cycles). The freshly distilled THF (0.40 mL) was added followed by the addition of (4-(2-(dimethylamino)ethoxy)phenyl)magnesium bromide (0.40 mmol, in THF). The Schlenk tube was sealed and magnetically stirred at oil bath (50 °C) for 18 h. Similar following work-up gave (*E*)-Tamoxifen **11b** (52 mg, 70%), 99% (*E*)-isomer.

<sup>1</sup>H NMR (400 MHz, CDCl<sub>3</sub>) δ 0.95 (t, *J* = 7.4 Hz, 3H), 2.36 (s, 6H), 2.51 (q, *J* = 7.4 Hz, 2H), 2.75 (t, *J* = 5.8 Hz, 2H), 4.09 (t, *J* = 5.8 Hz, 2H), 6.87–6.91 (m, 4H), 6.97–7.02 (m, 3H), 7.07–7.17 (m, 7H); <sup>13</sup>C NMR (100 MHz, CDCl<sub>3</sub>) δ 13.5, 29.0, 45.9, 58.3, 65.9, 114.1, 125.6, 126.0, 127.2, 127.7, 129.7, 130.5, 130.8, 136.0, 138.4, 141.9, 142.4, 143.3, 157.5. The spectral data is in accordance with literature.<sup>30</sup>

7.  $^1\text{H}$ ,  $^{13}\text{C}$ ,  $^{19}\text{F}$ -NMR and HRMS spectra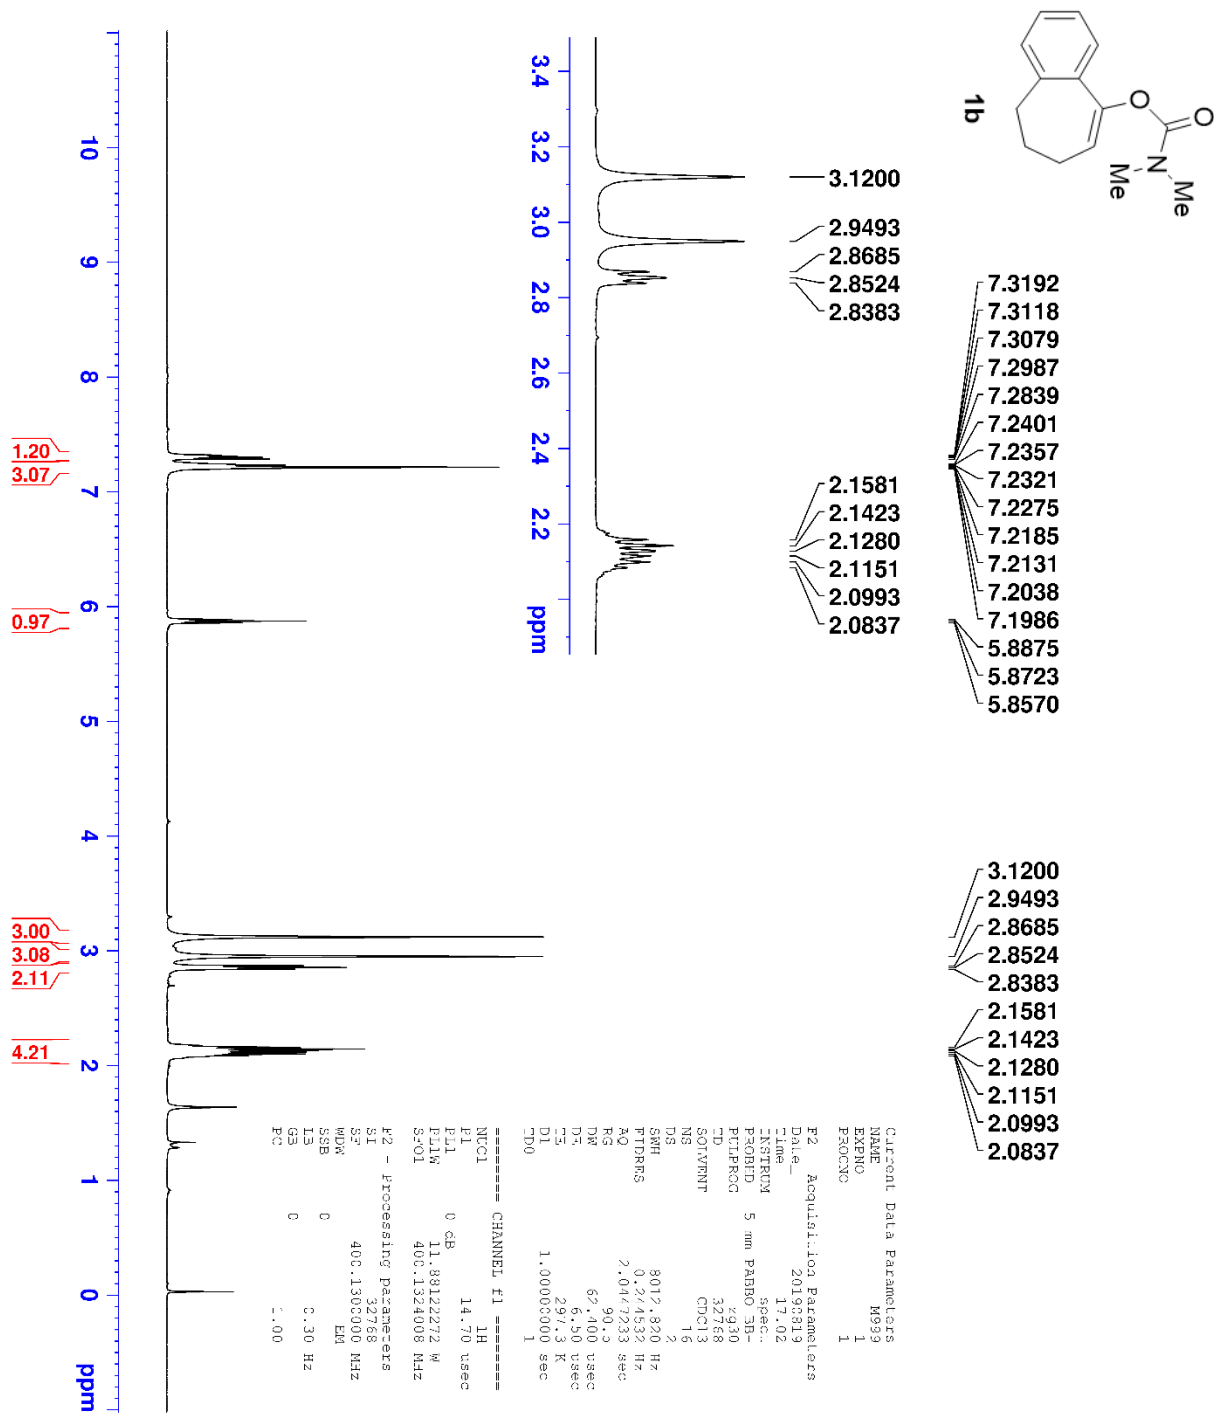

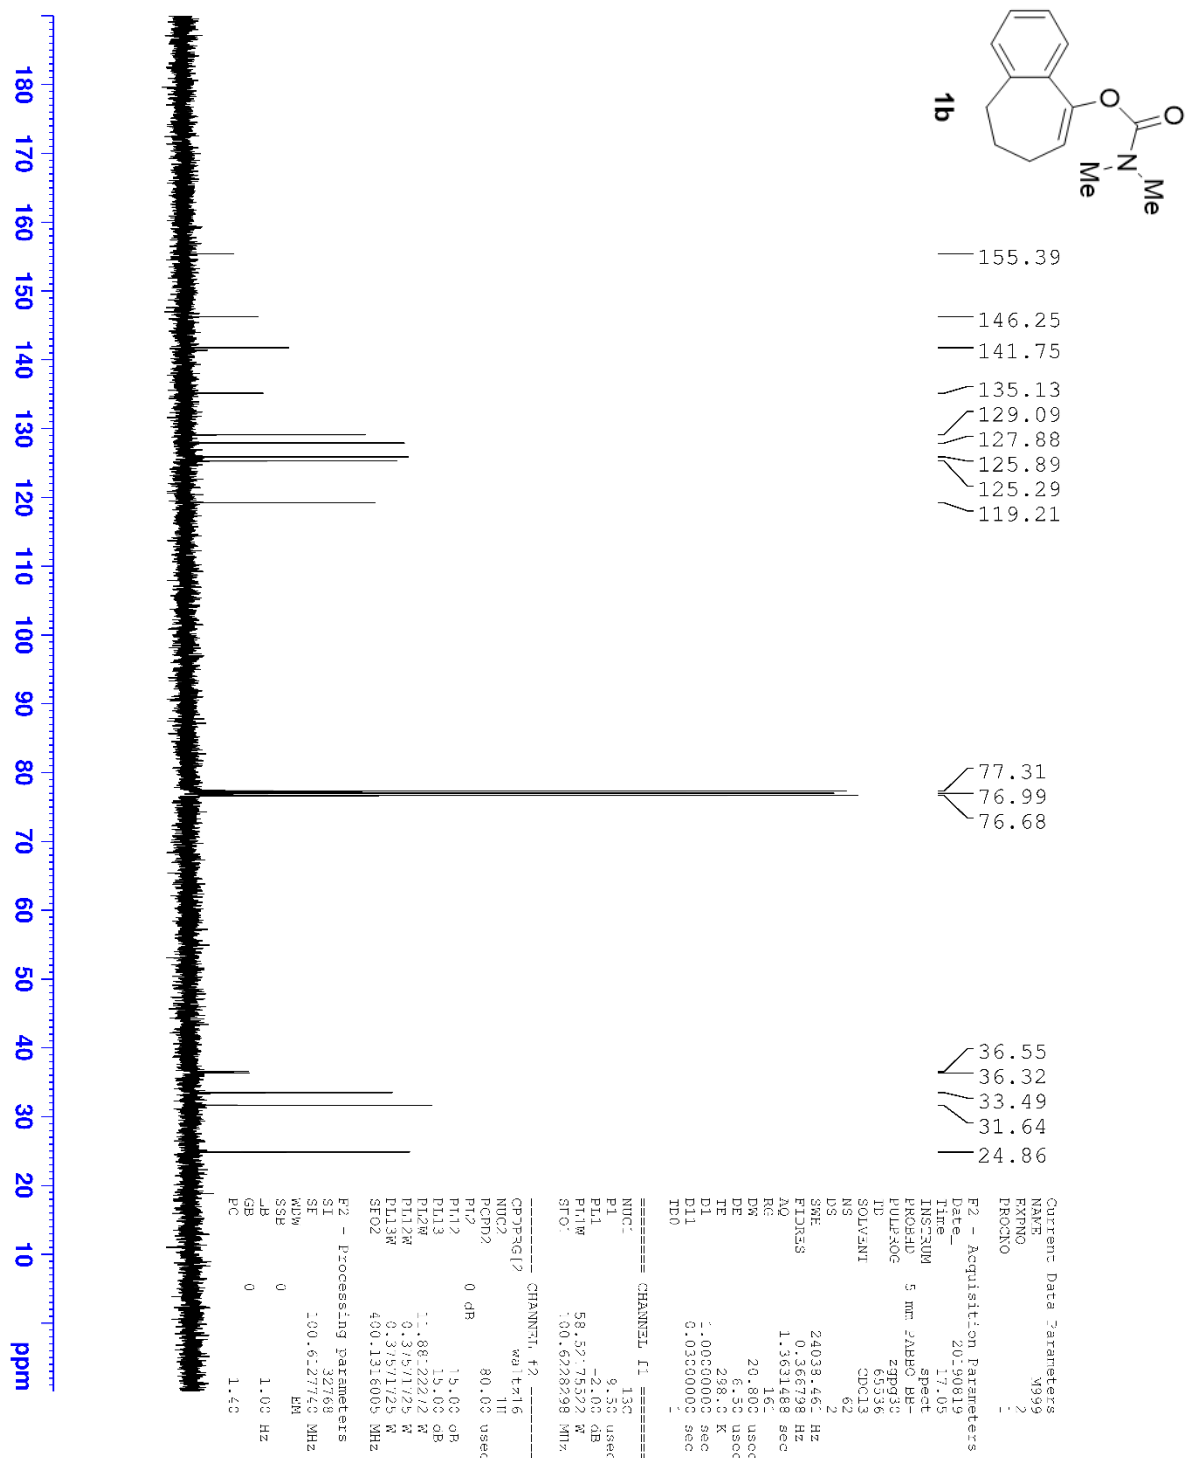

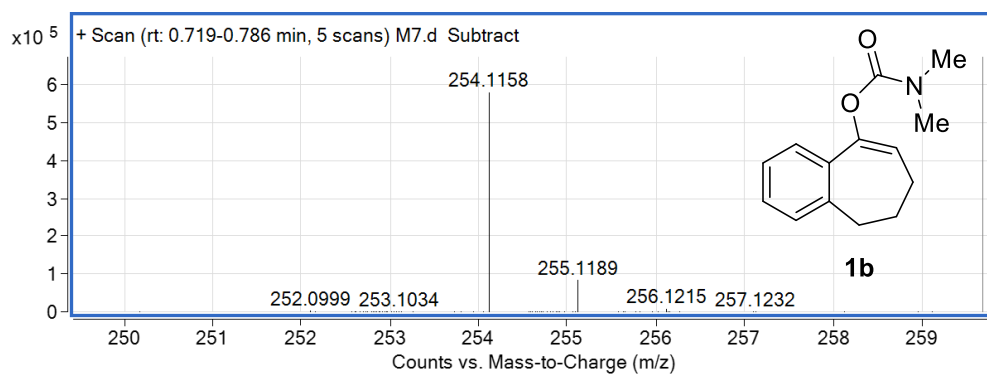

| Mass     | Calc. Mass | mDa   | PPM   | Formula                                            |
|----------|------------|-------|-------|----------------------------------------------------|
| 254.1158 | 254.1151   | -0.65 | -2.81 | C <sub>14</sub> H <sub>17</sub> NO <sub>2</sub> Na |

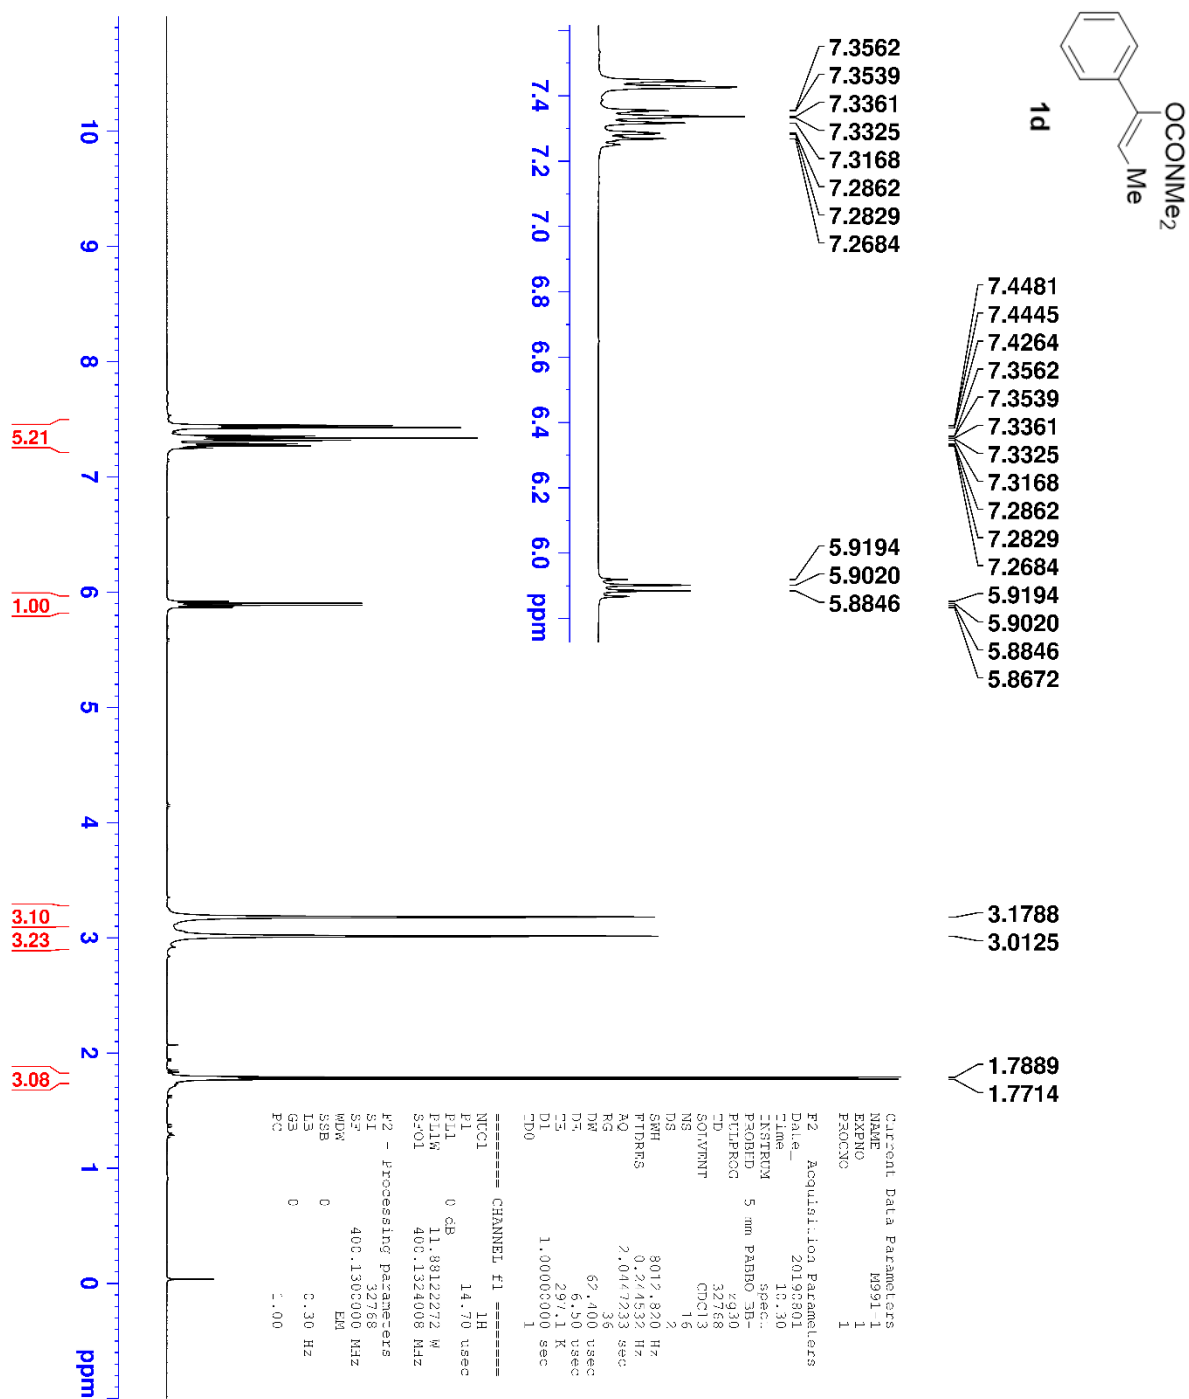

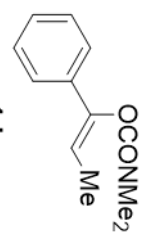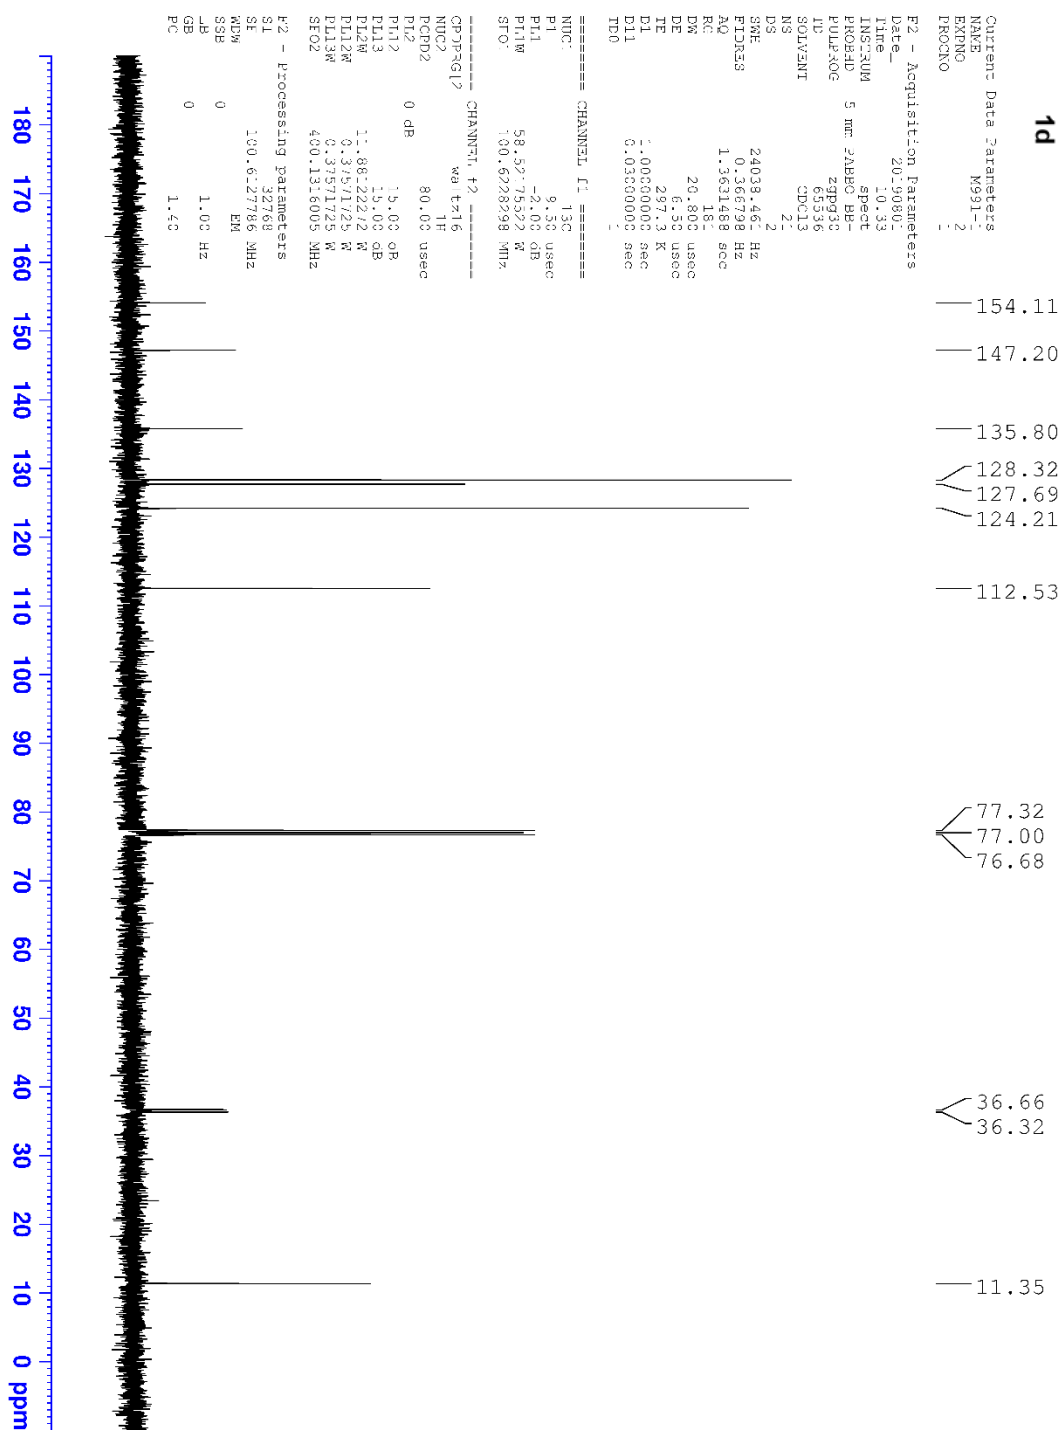

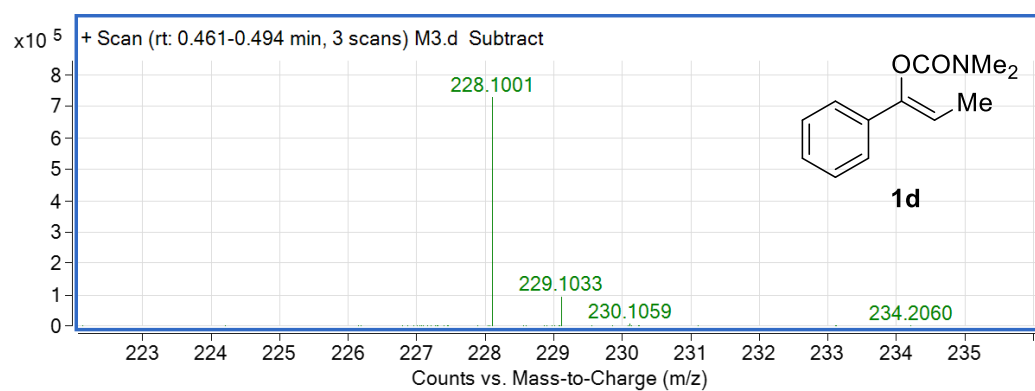

| Mass     | Calc. Mass | mDa  | PPM   | Formula                                            |
|----------|------------|------|-------|----------------------------------------------------|
| 228.1001 | 228.0995   | -0.6 | -2.93 | C <sub>12</sub> H <sub>15</sub> NO <sub>2</sub> Na |



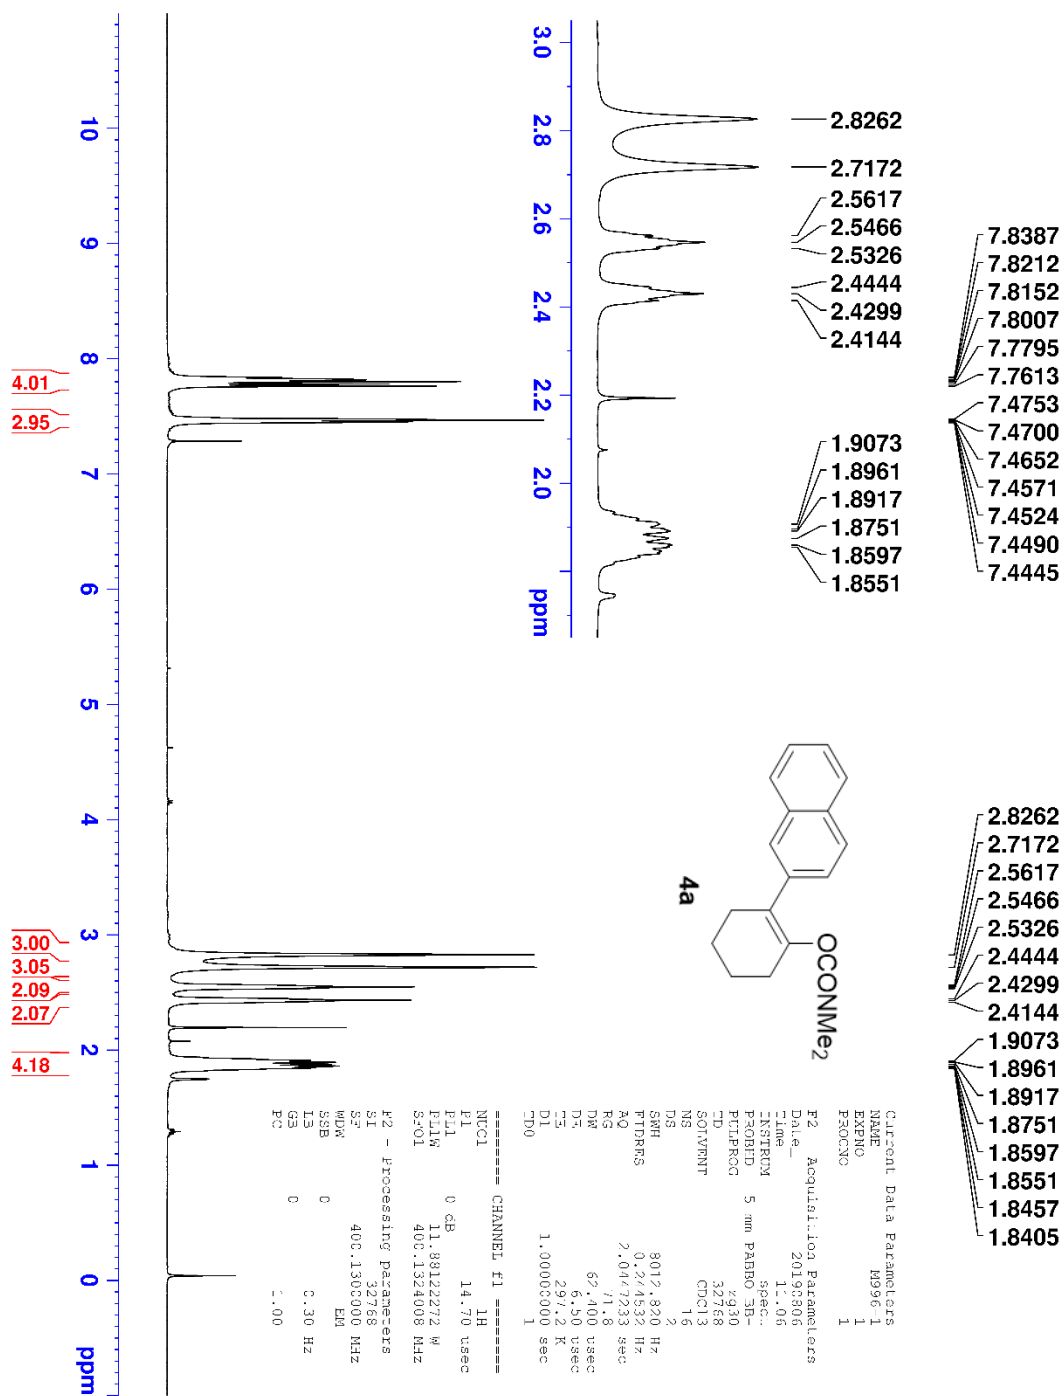

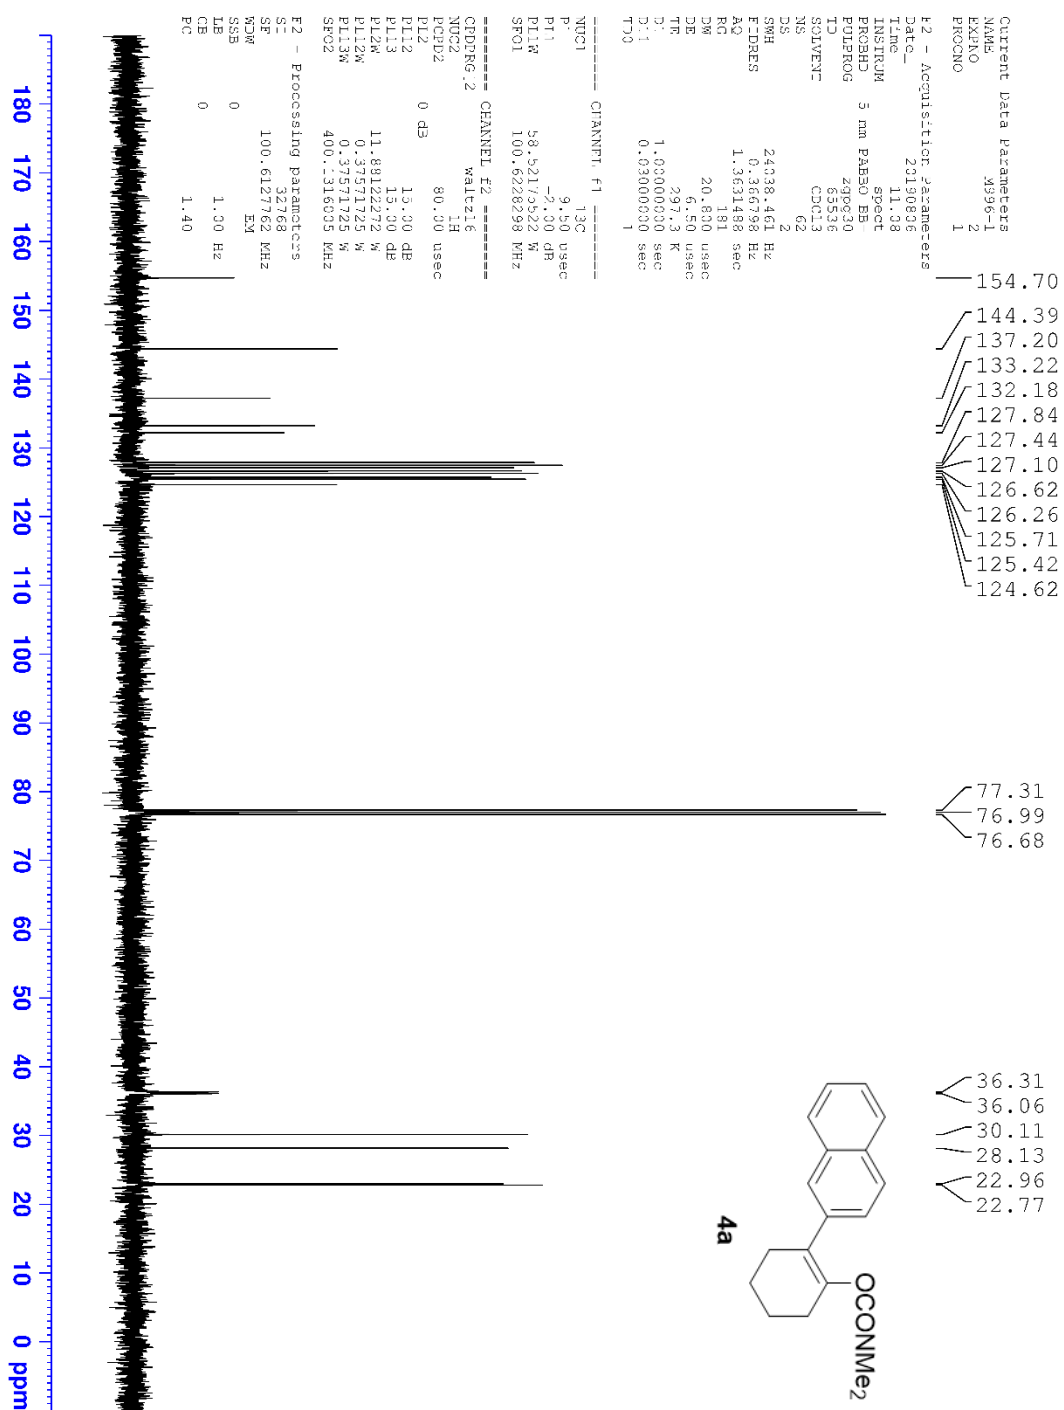

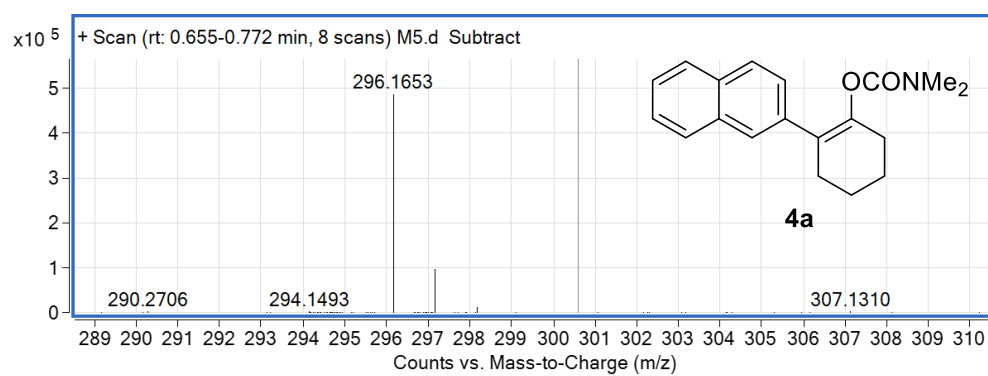

| Mass     | Calc. Mass | mDa   | PPM   | Formula                                         |
|----------|------------|-------|-------|-------------------------------------------------|
| 296.1653 | 296.1645   | -0.79 | -2.69 | C <sub>19</sub> H <sub>22</sub> NO <sub>2</sub> |

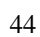

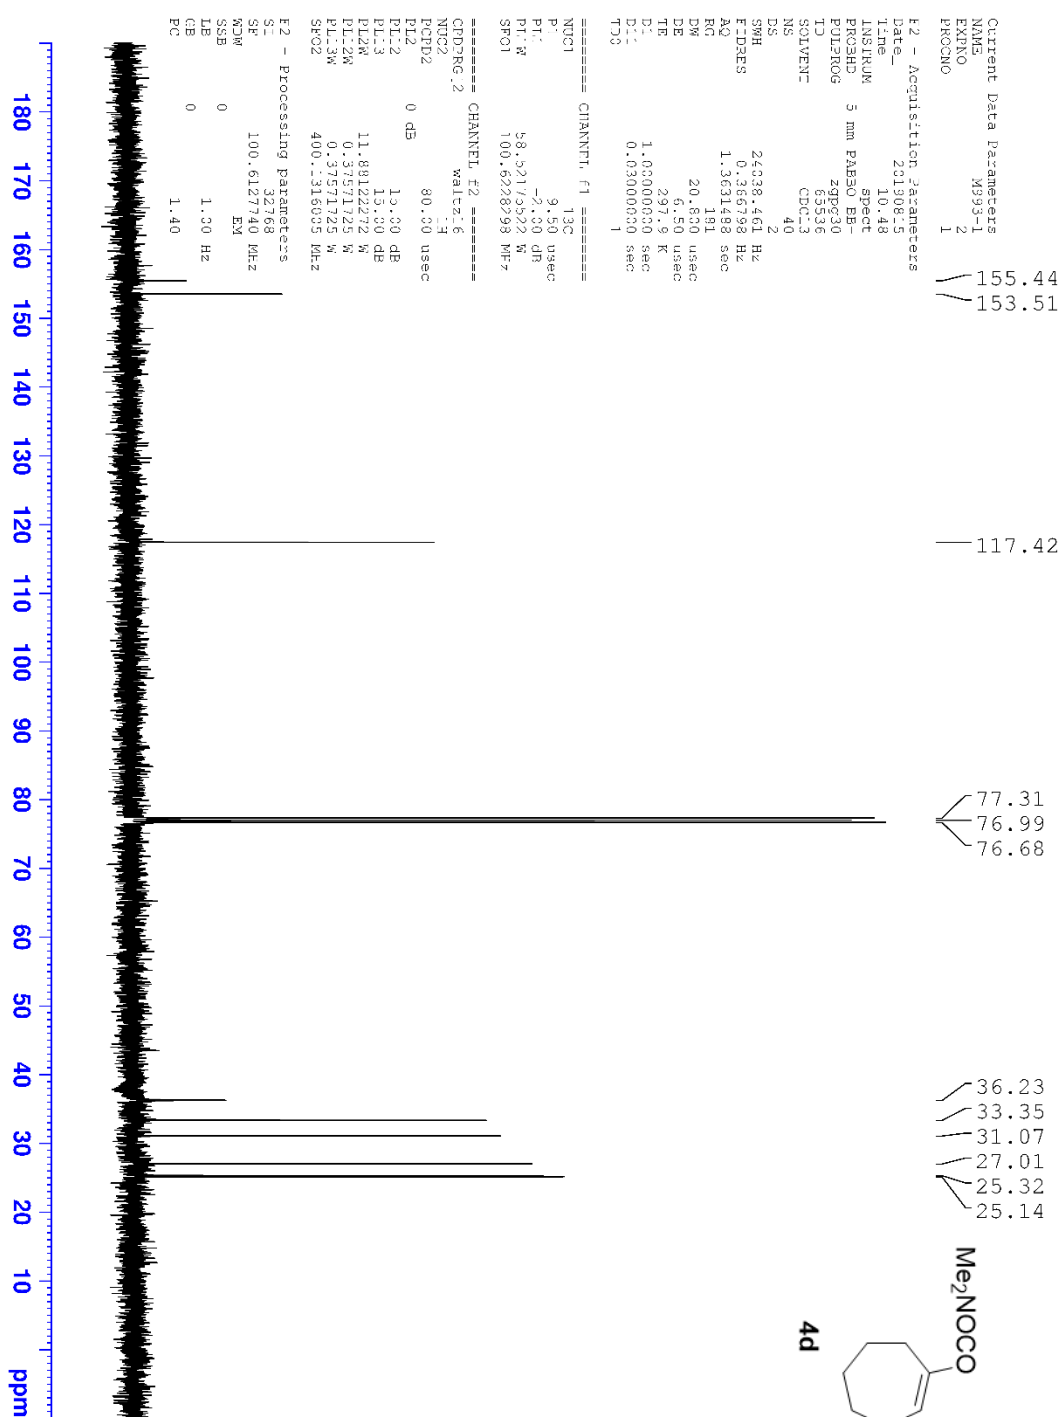

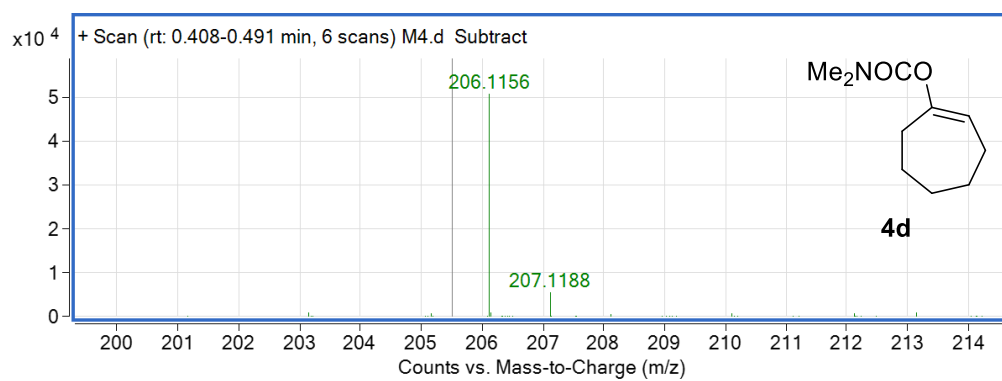

| Mass     | Calc. Mass | mDa   | PPM   | Formula                                            |
|----------|------------|-------|-------|----------------------------------------------------|
| 206.1156 | 206.1151   | -0.45 | -2.46 | C <sub>10</sub> H <sub>17</sub> NO <sub>2</sub> Na |

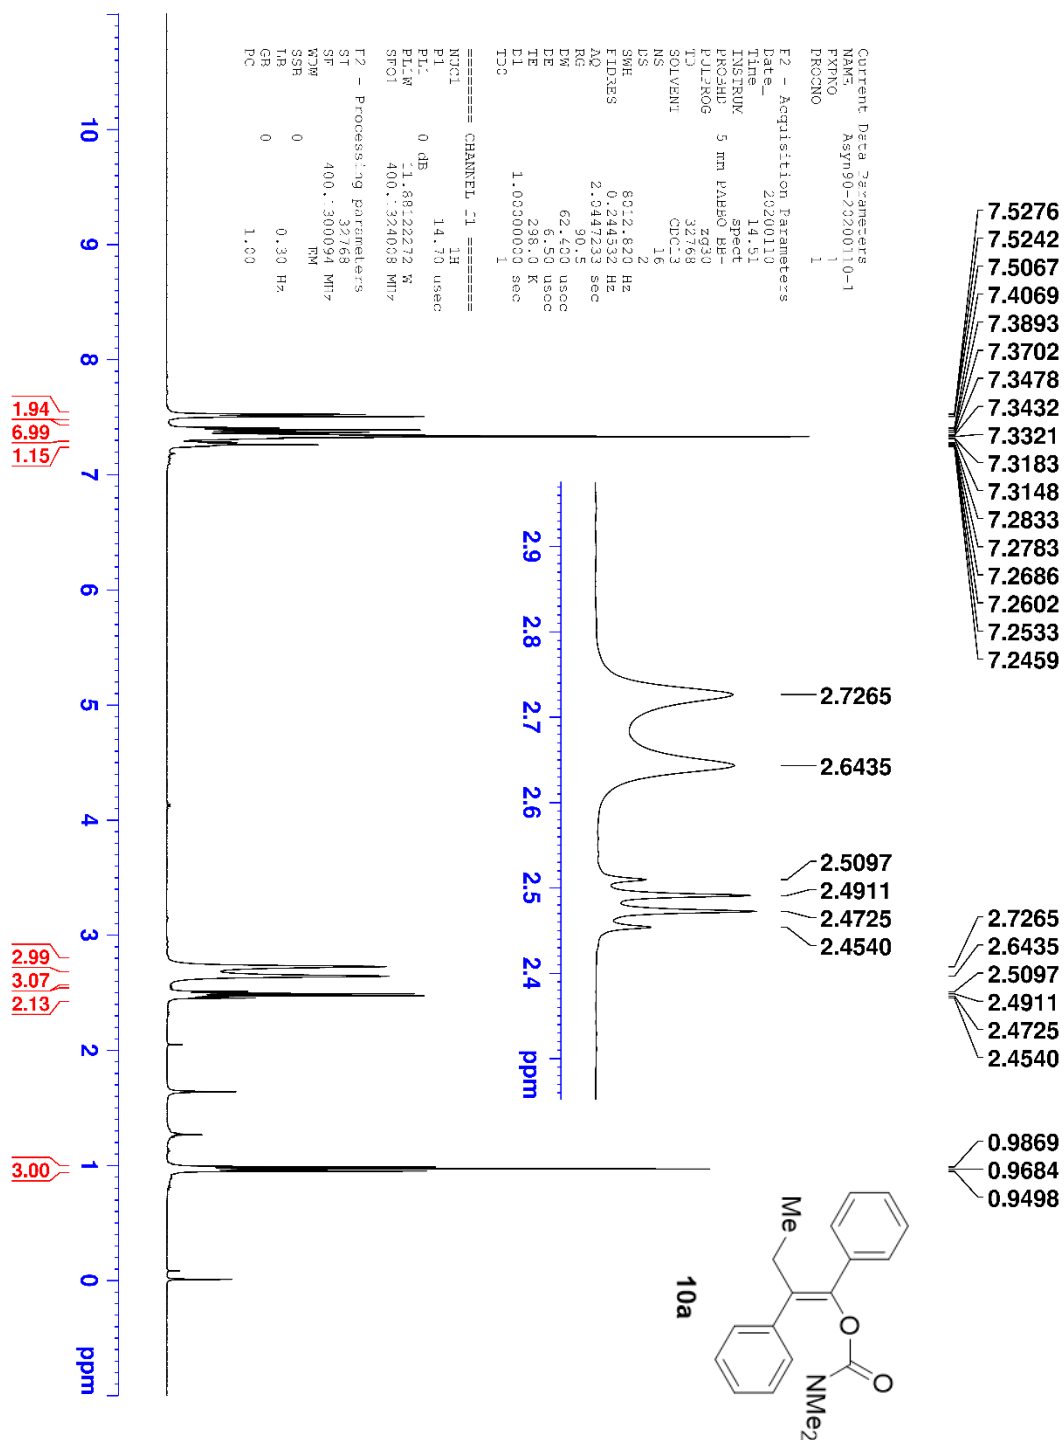

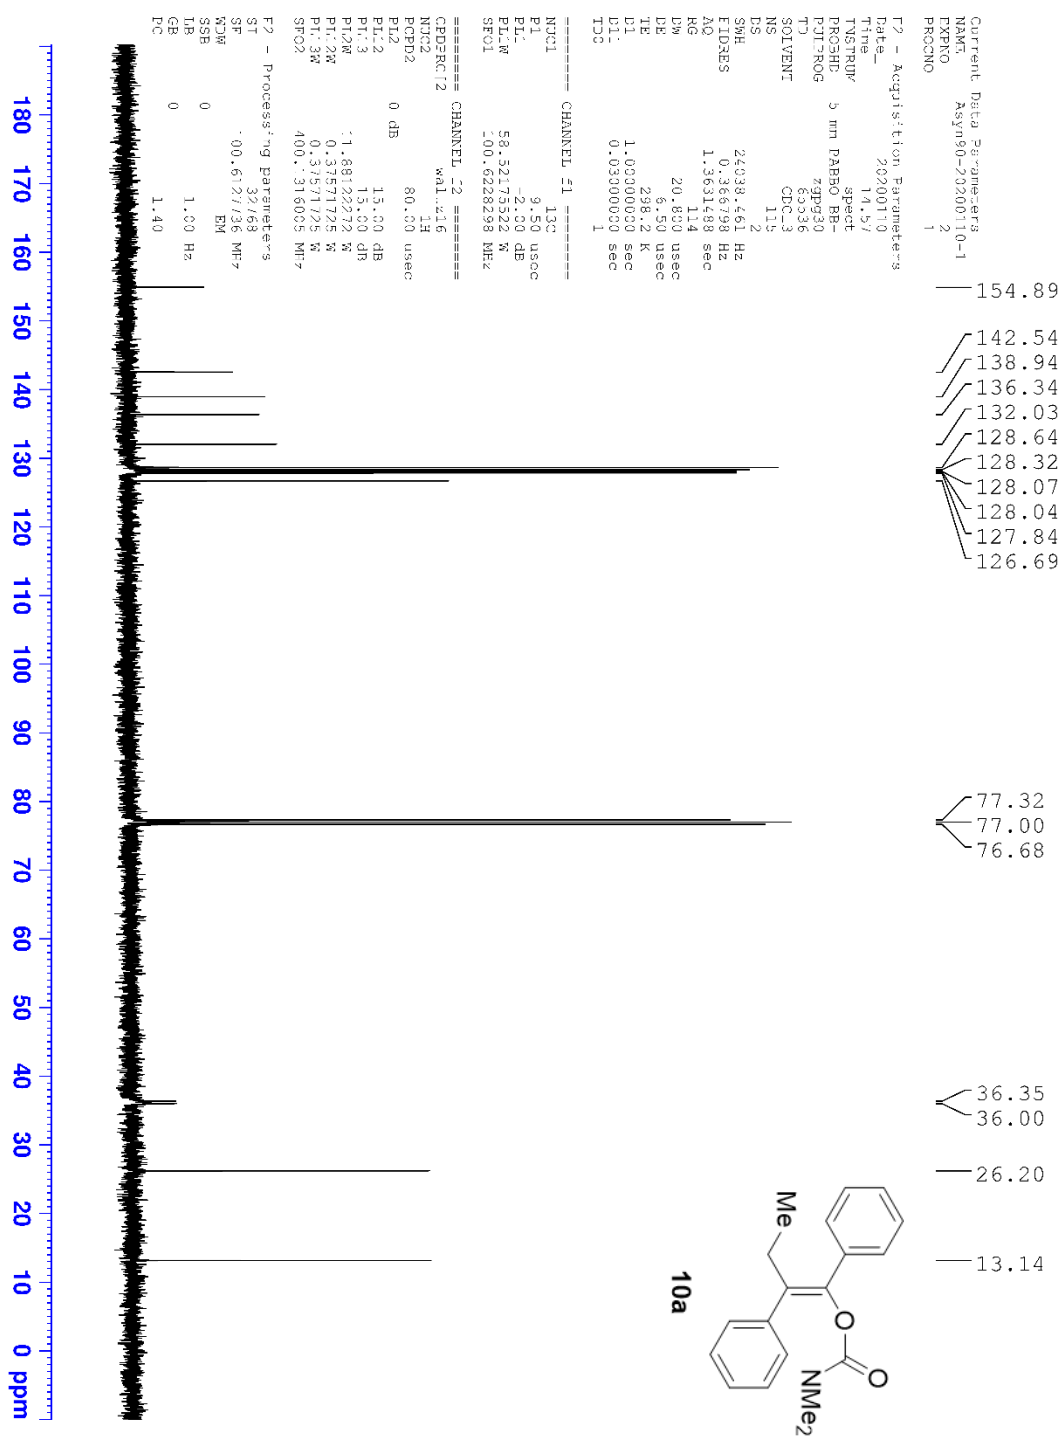



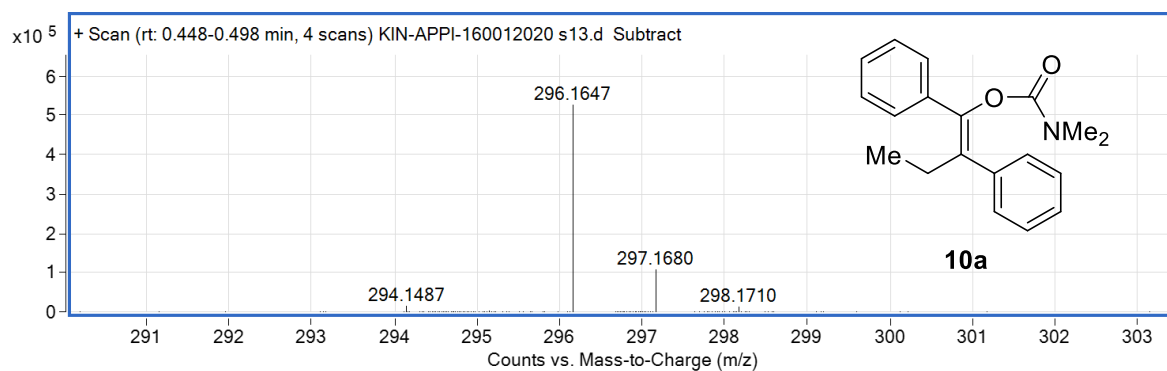

| Mass     | Calc. Mass | mDa   | PPM   | Formula                                         |
|----------|------------|-------|-------|-------------------------------------------------|
| 296.1647 | 296.1645   | -0.19 | -0.66 | C <sub>19</sub> H <sub>22</sub> NO <sub>2</sub> |

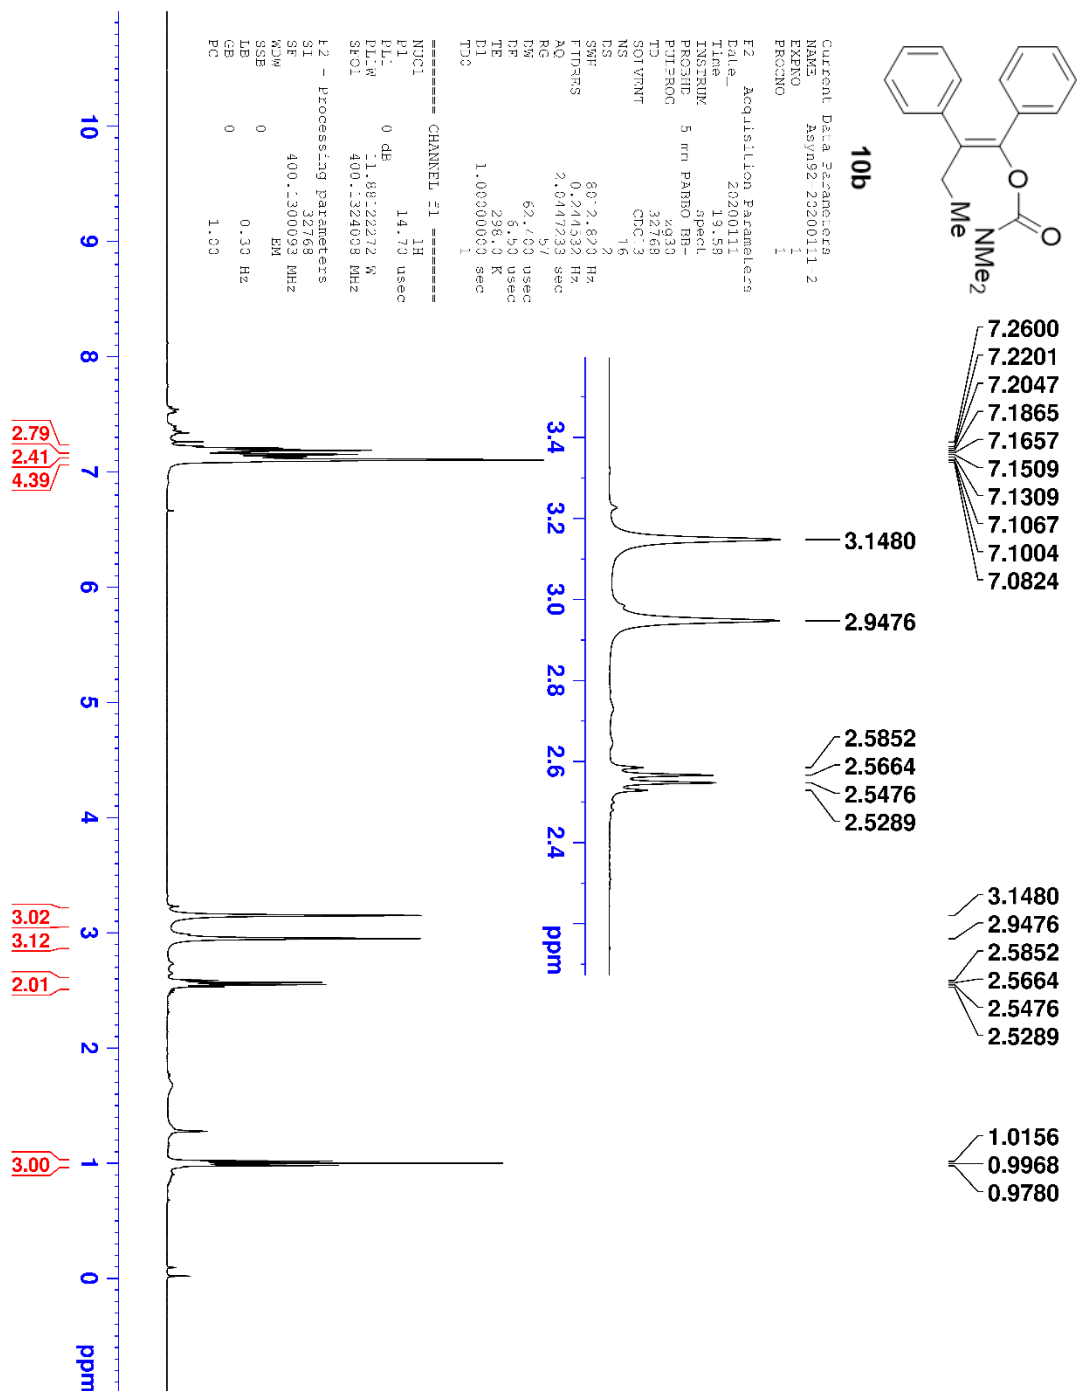

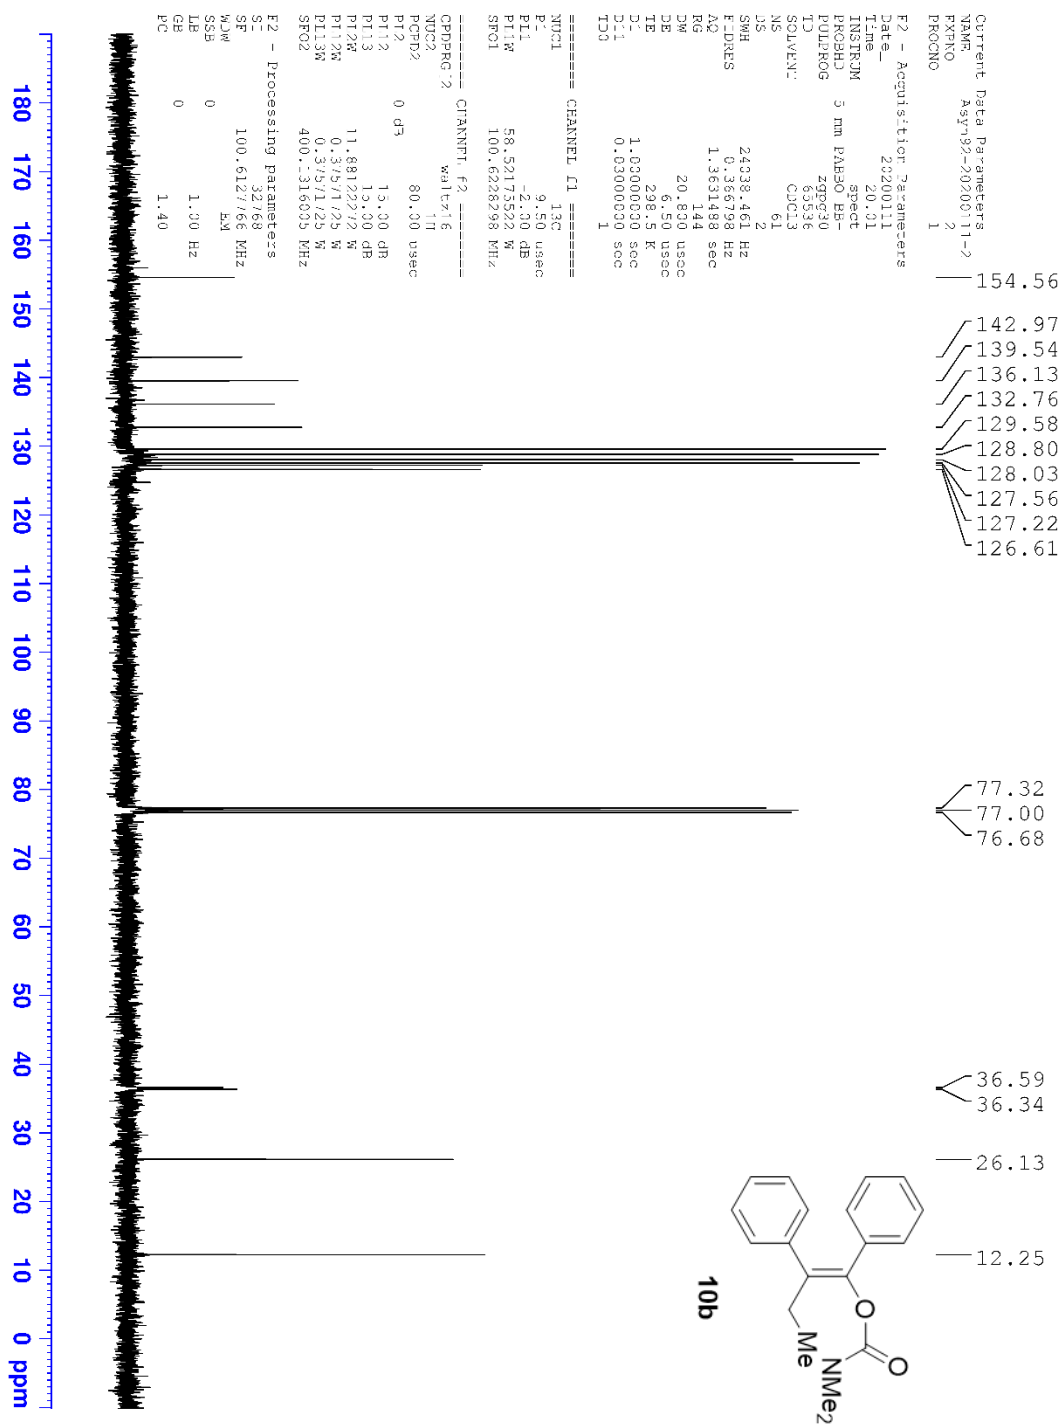

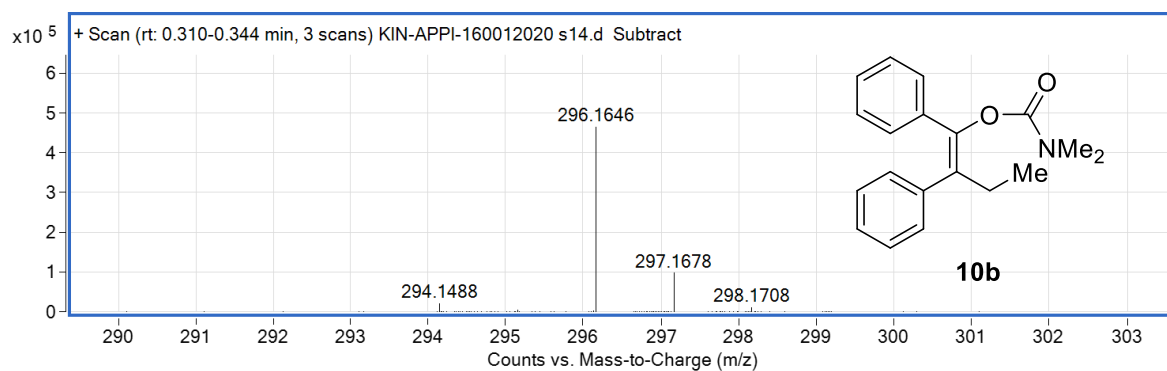

| Mass     | Calc. Mass | mDa   | PPM   | Formula                                         |
|----------|------------|-------|-------|-------------------------------------------------|
| 296.1646 | 296.1645   | -0.09 | -0.32 | C <sub>19</sub> H <sub>22</sub> NO <sub>2</sub> |

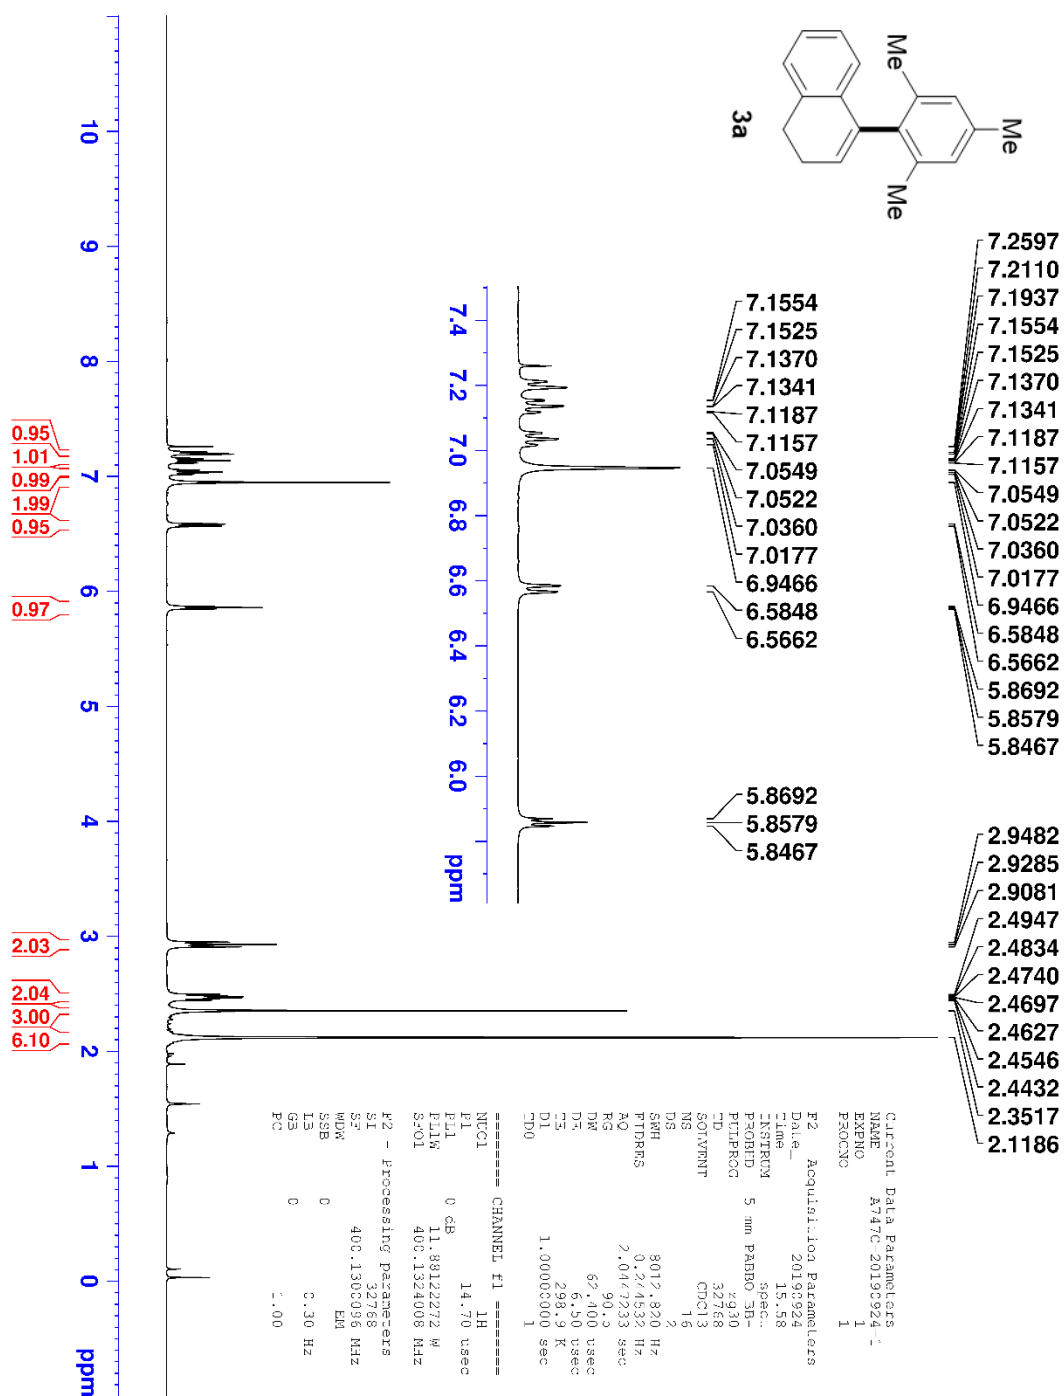

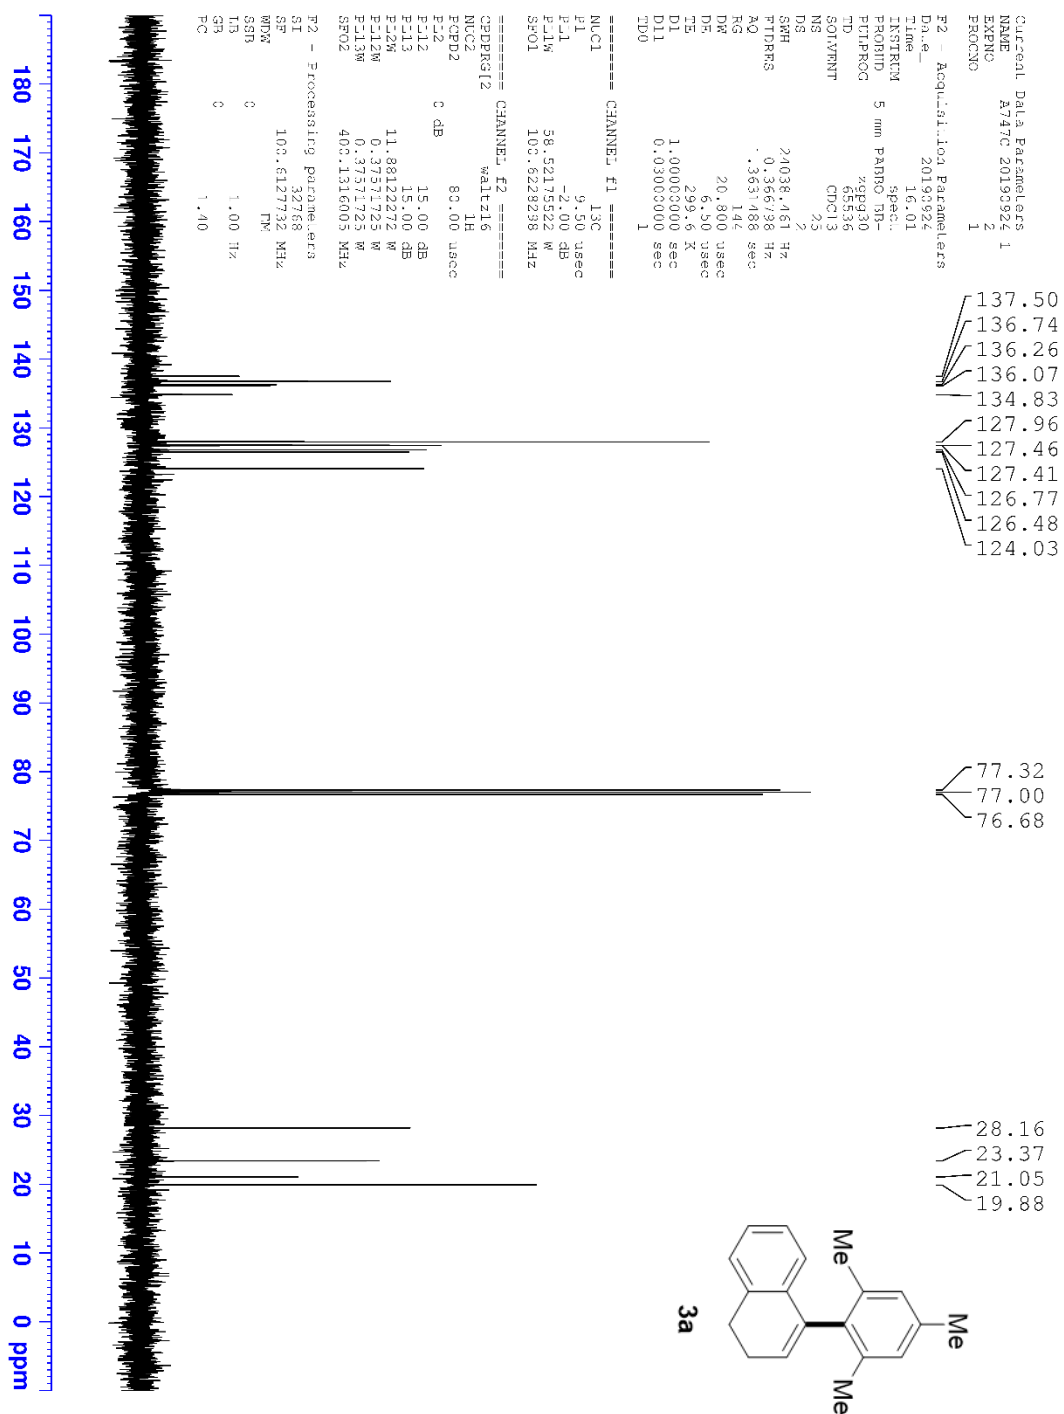

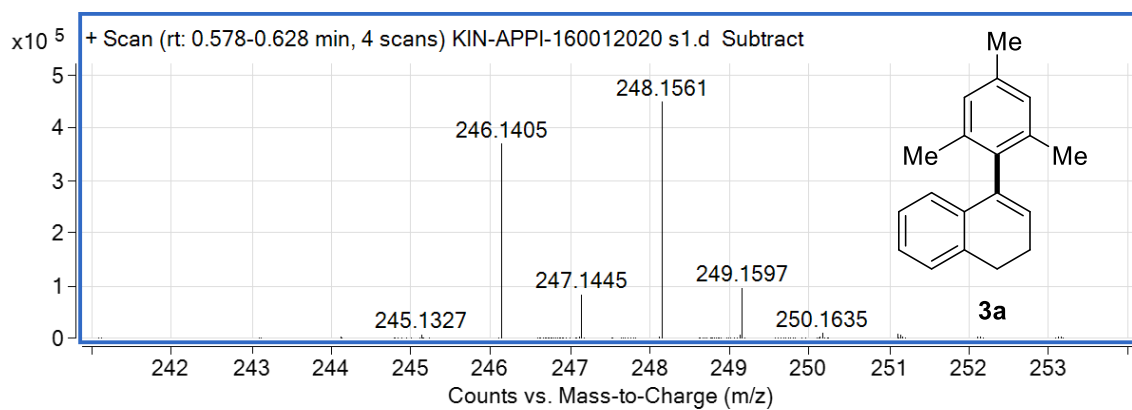

| Mass     | Calc. Mass | mDa | PPM  | Formula                         |
|----------|------------|-----|------|---------------------------------|
| 248.1561 | 248.1565   | 0.4 | 1.61 | C <sub>19</sub> H <sub>20</sub> |

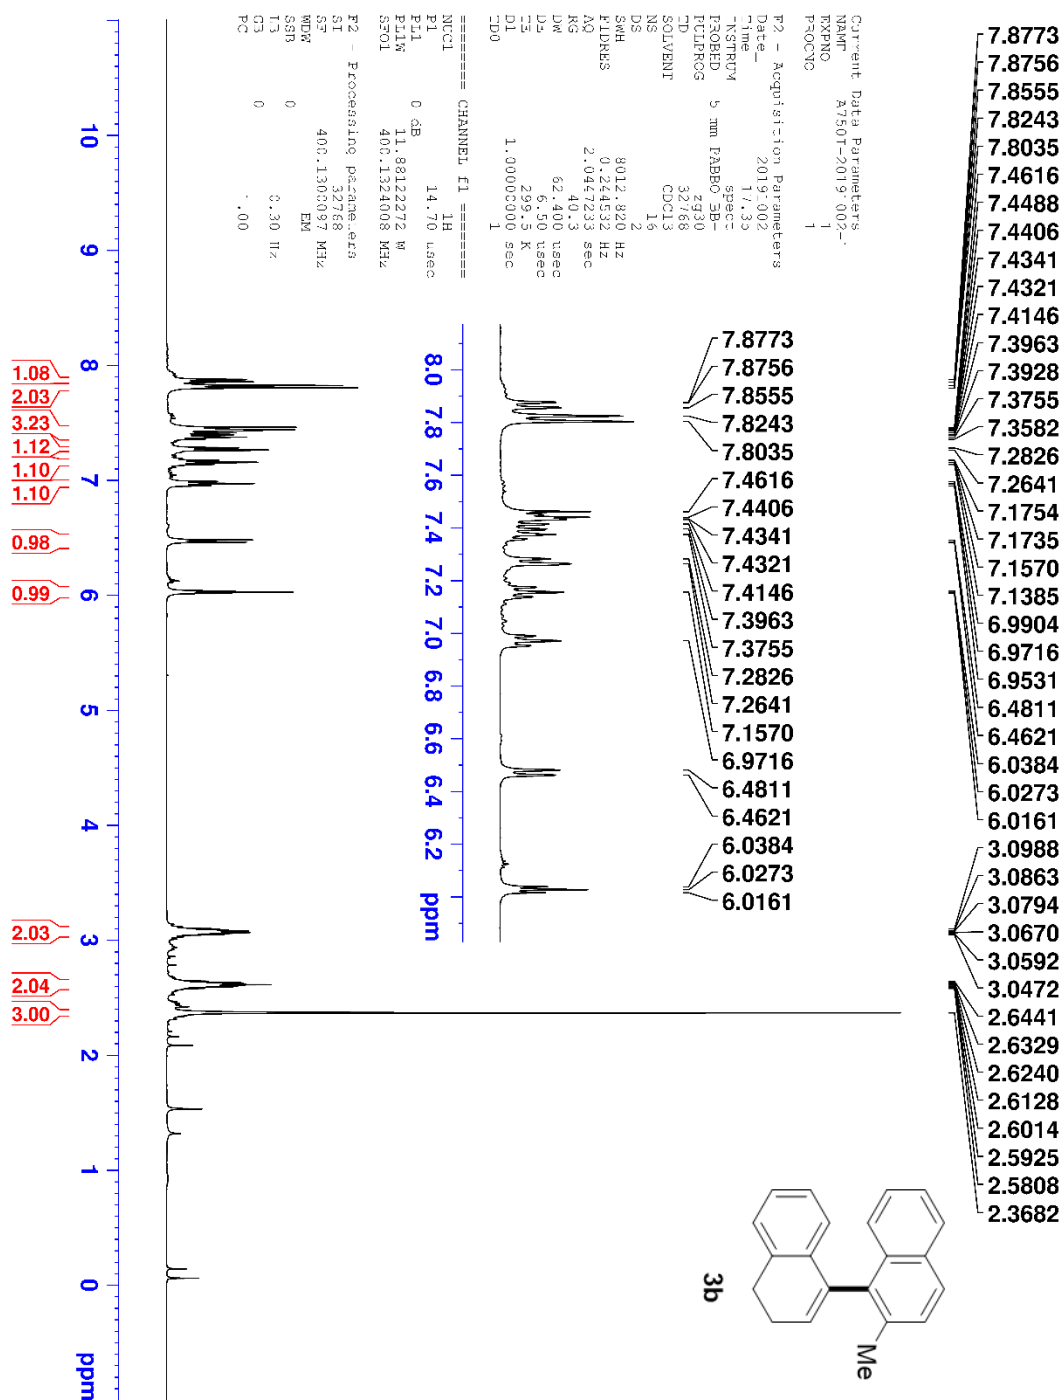



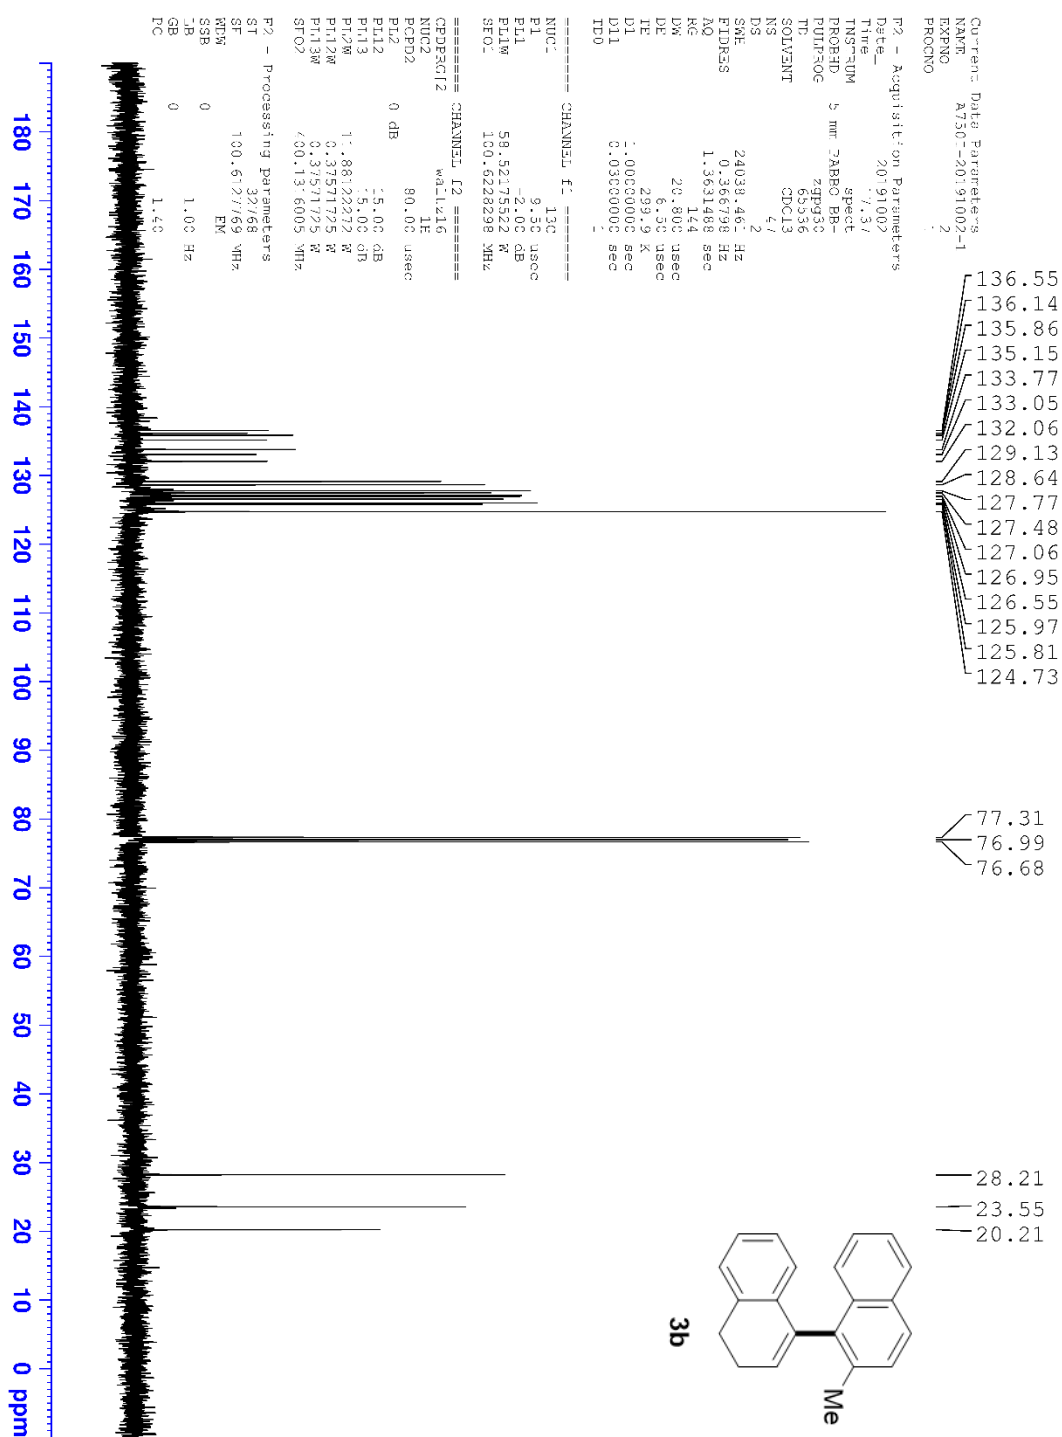

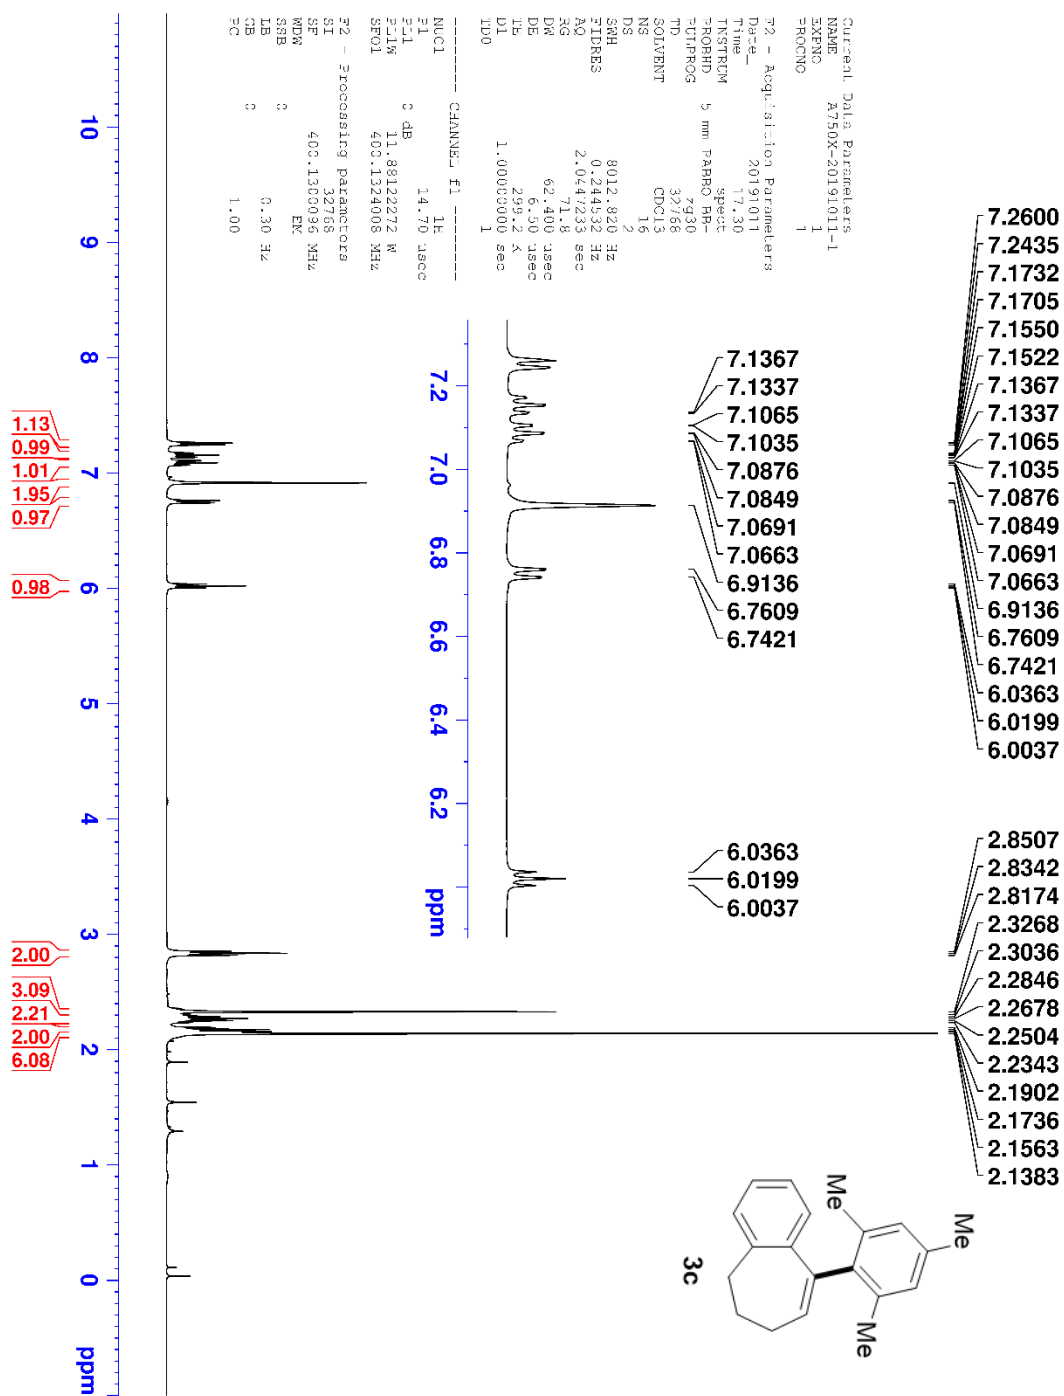

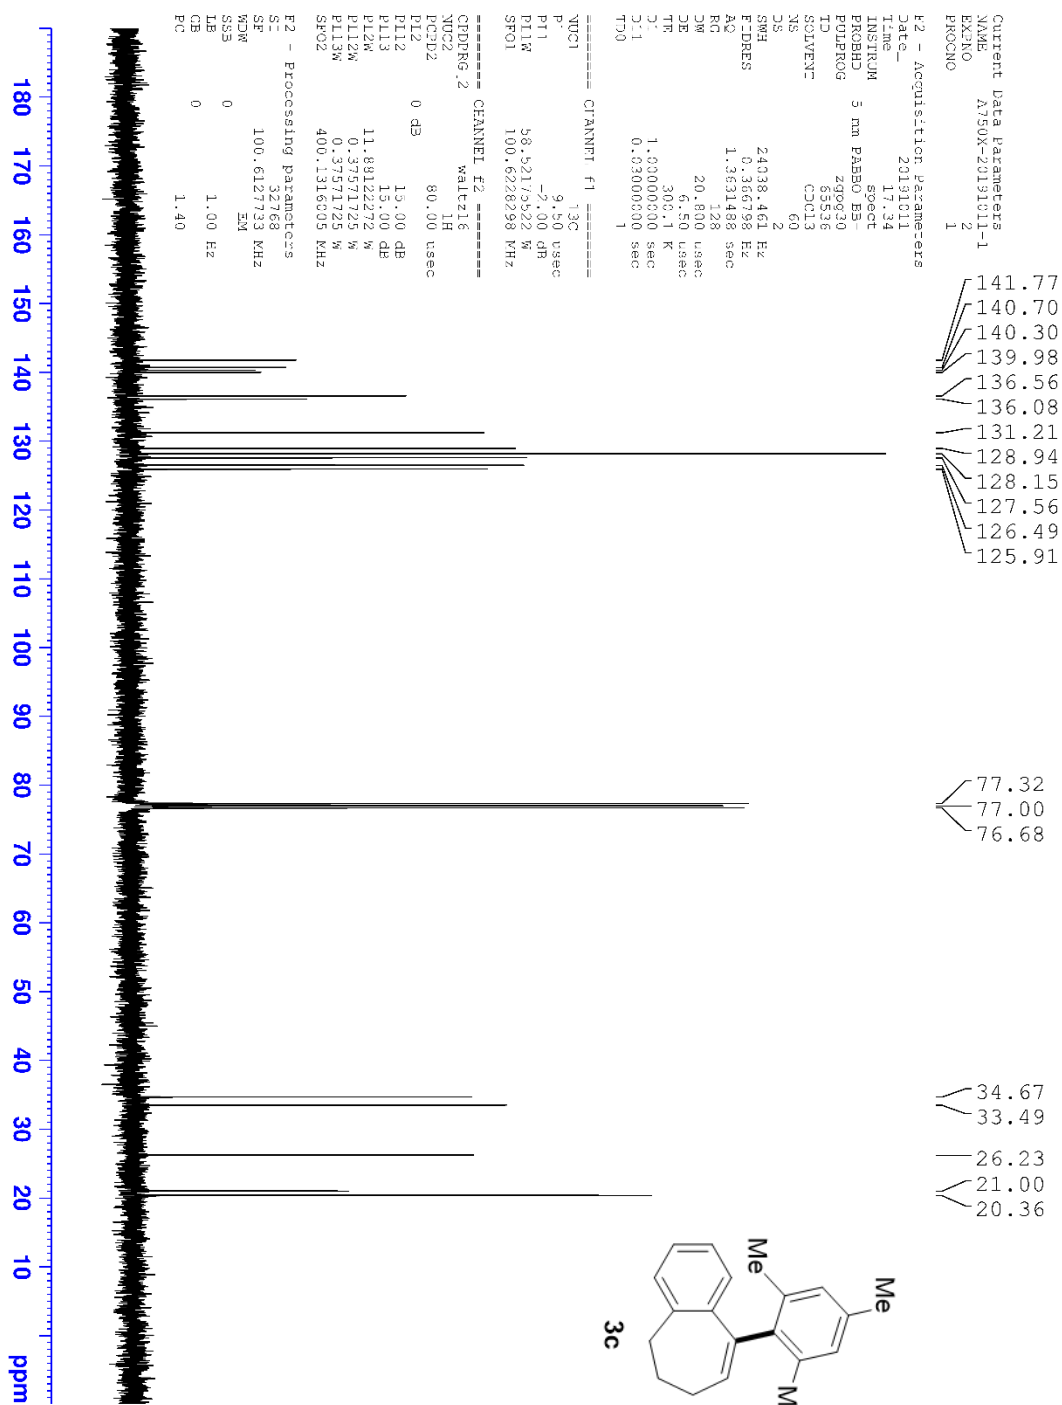

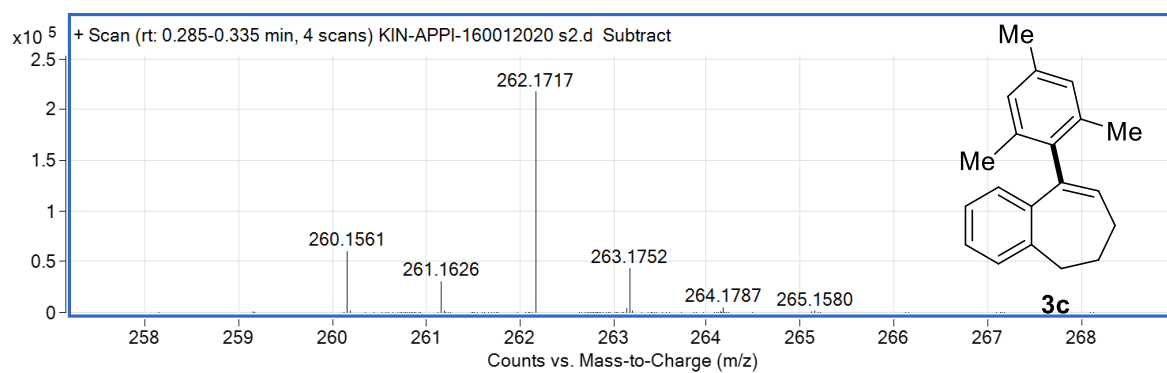

| Mass     | Calc. Mass | mDa  | PPM  | Formula                         |
|----------|------------|------|------|---------------------------------|
| 262.1717 | 262.1722   | 0.45 | 1.72 | C <sub>20</sub> H <sub>22</sub> |

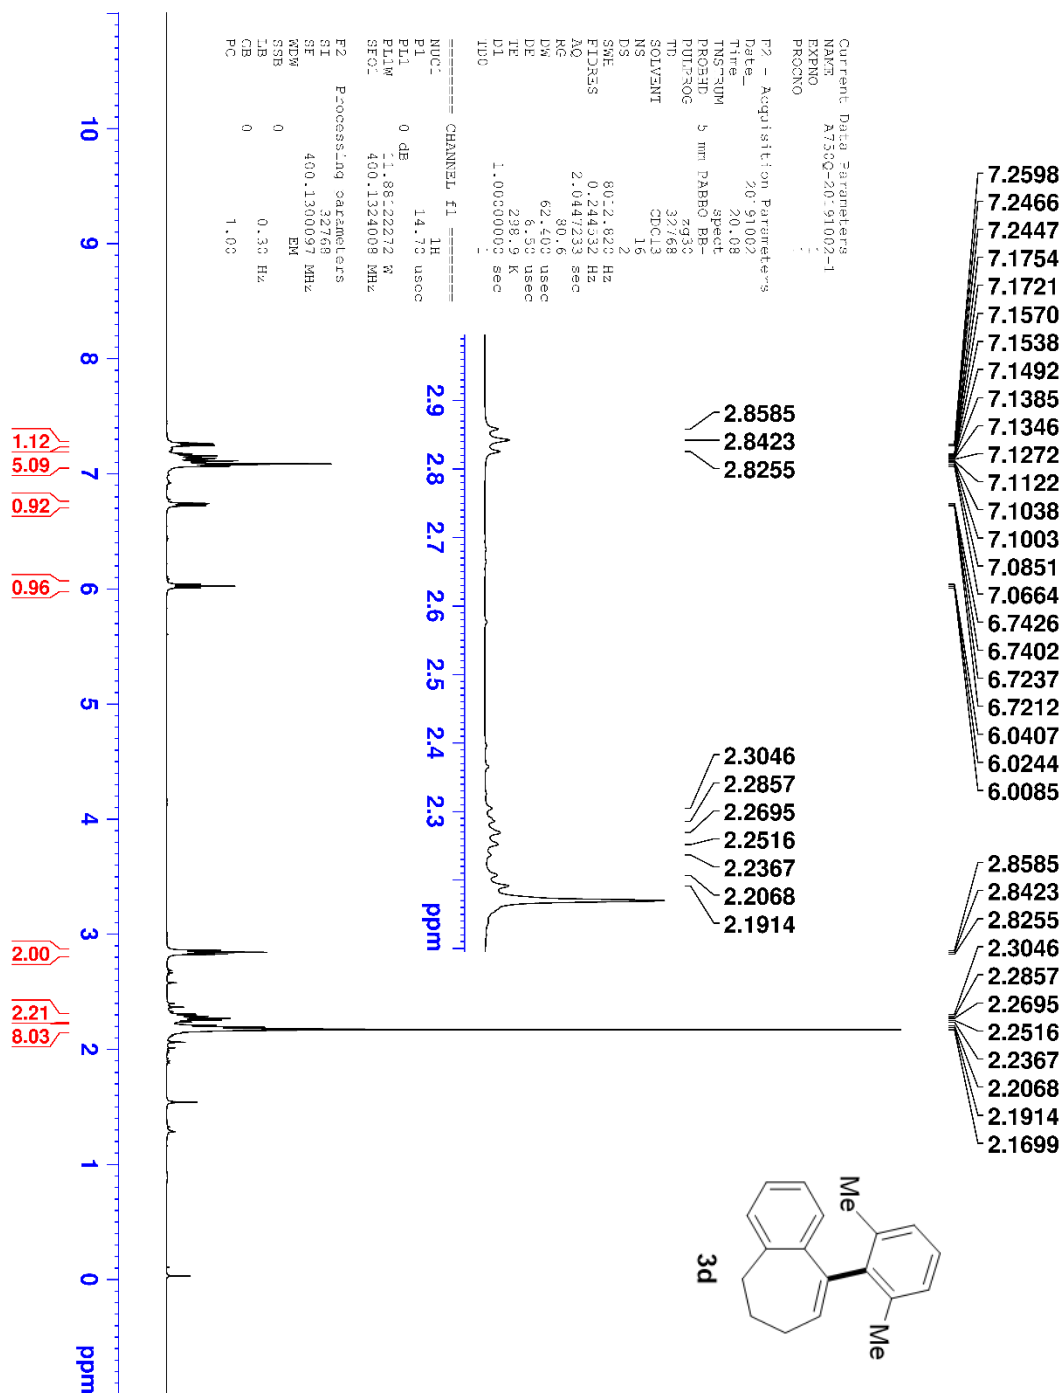

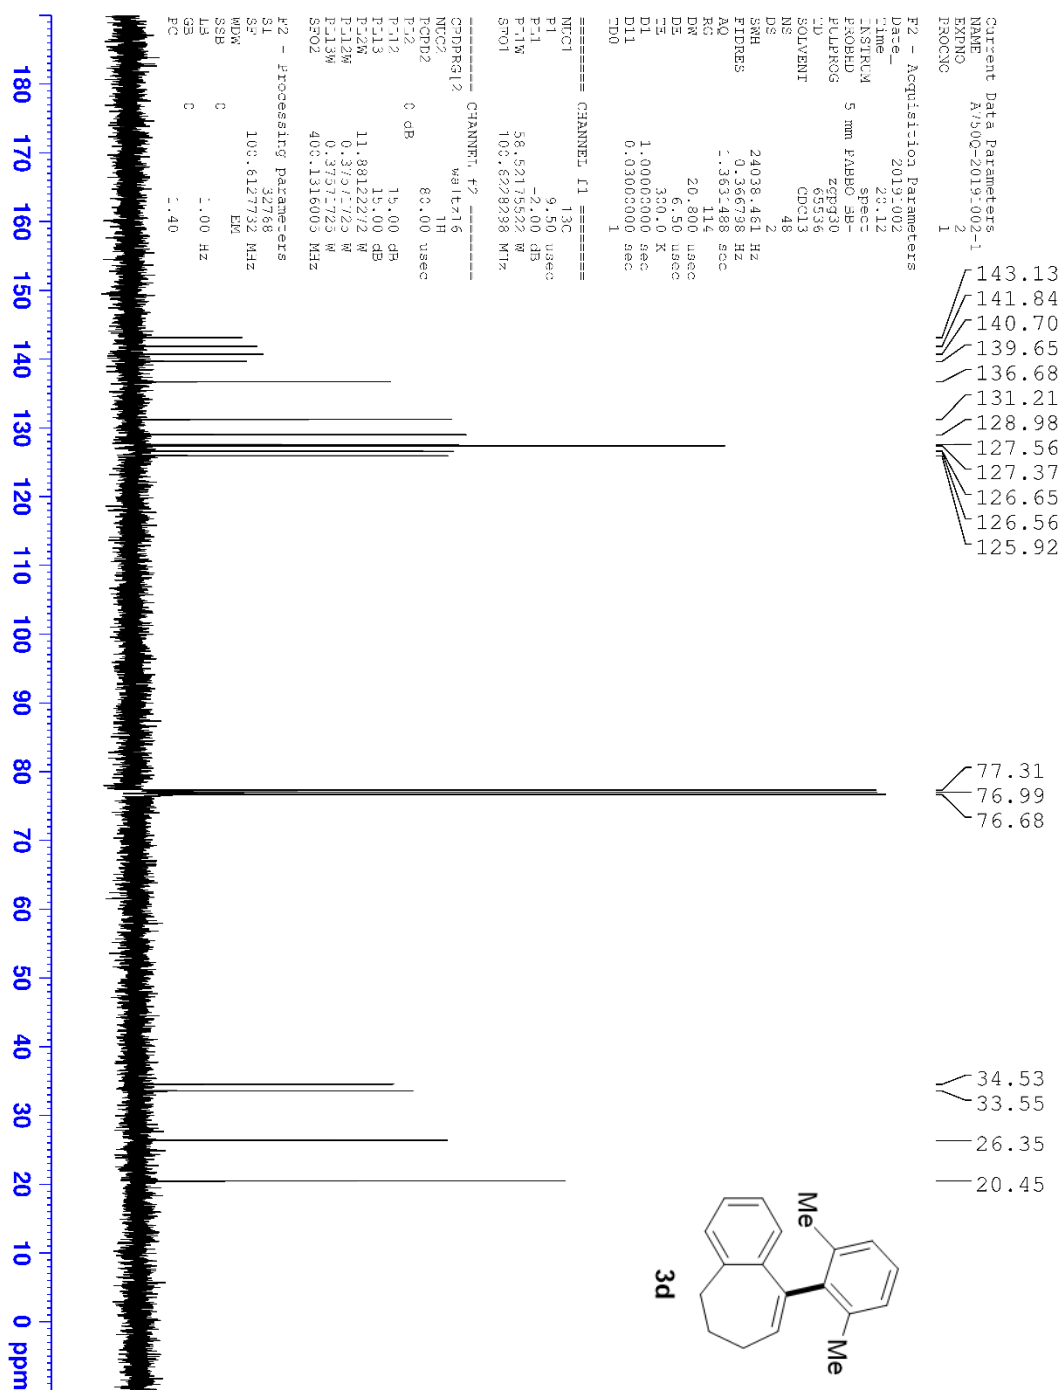

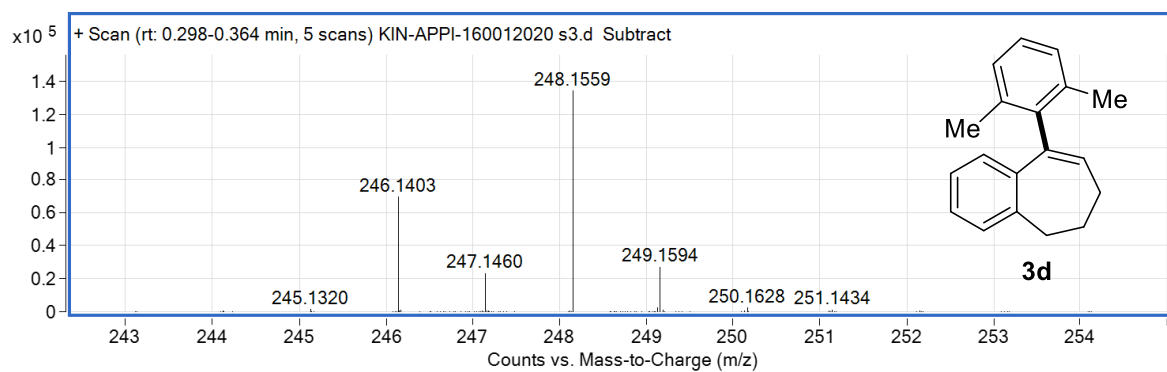

| Mass     | Calc. Mass | mDa | PPM  | Formula                         |
|----------|------------|-----|------|---------------------------------|
| 248.1559 | 248.1565   | 0.6 | 2.42 | C <sub>19</sub> H <sub>20</sub> |

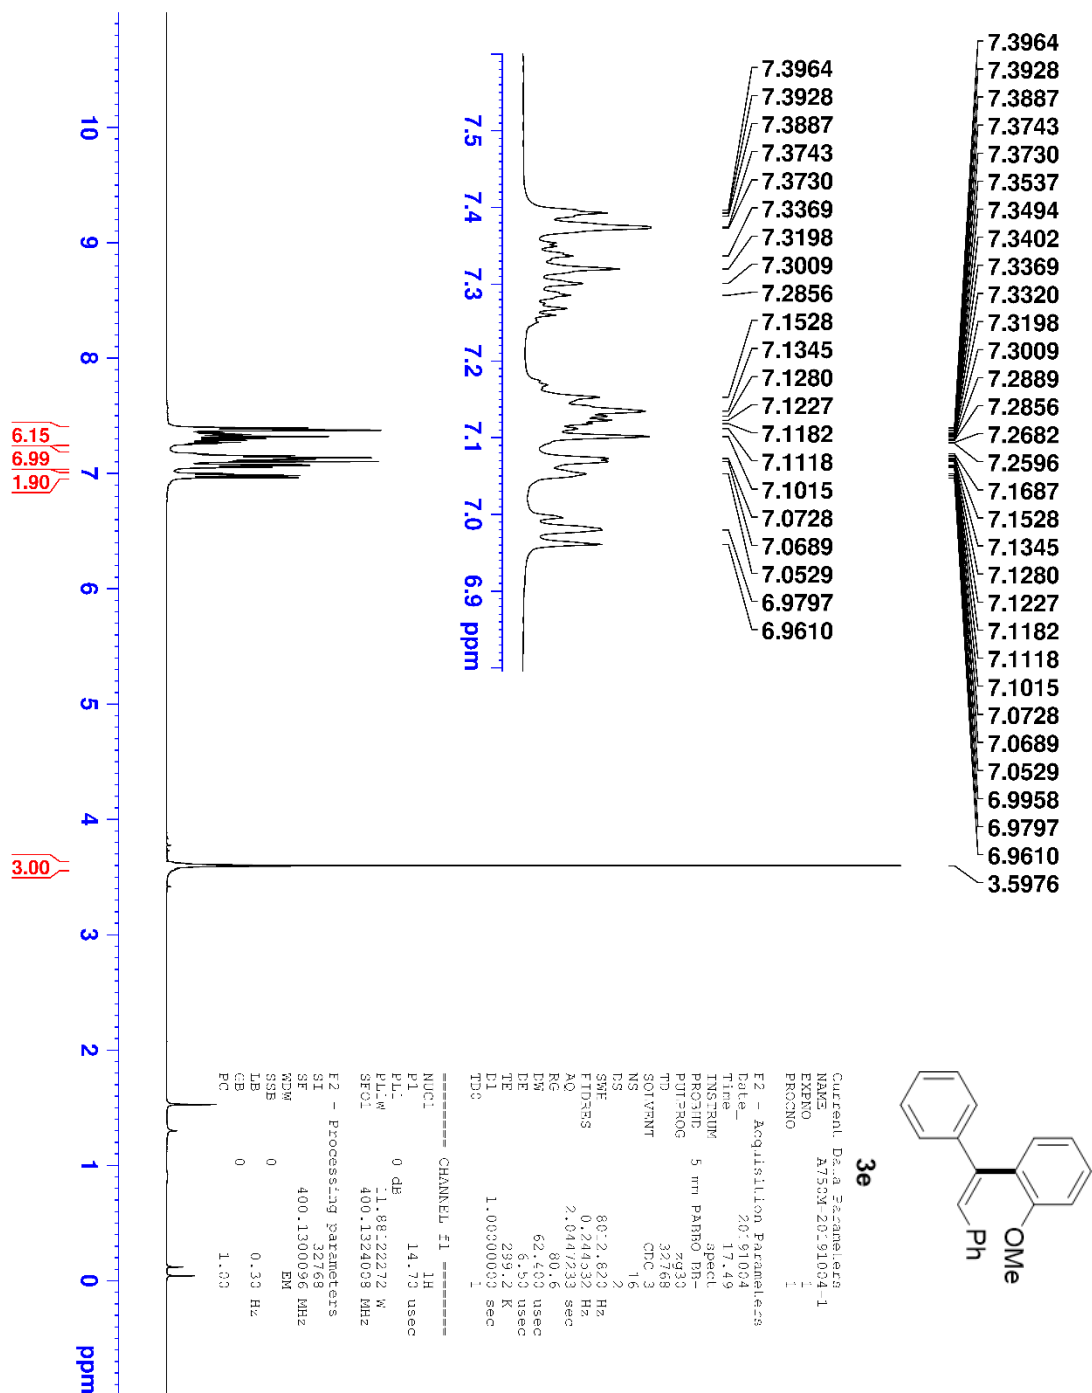



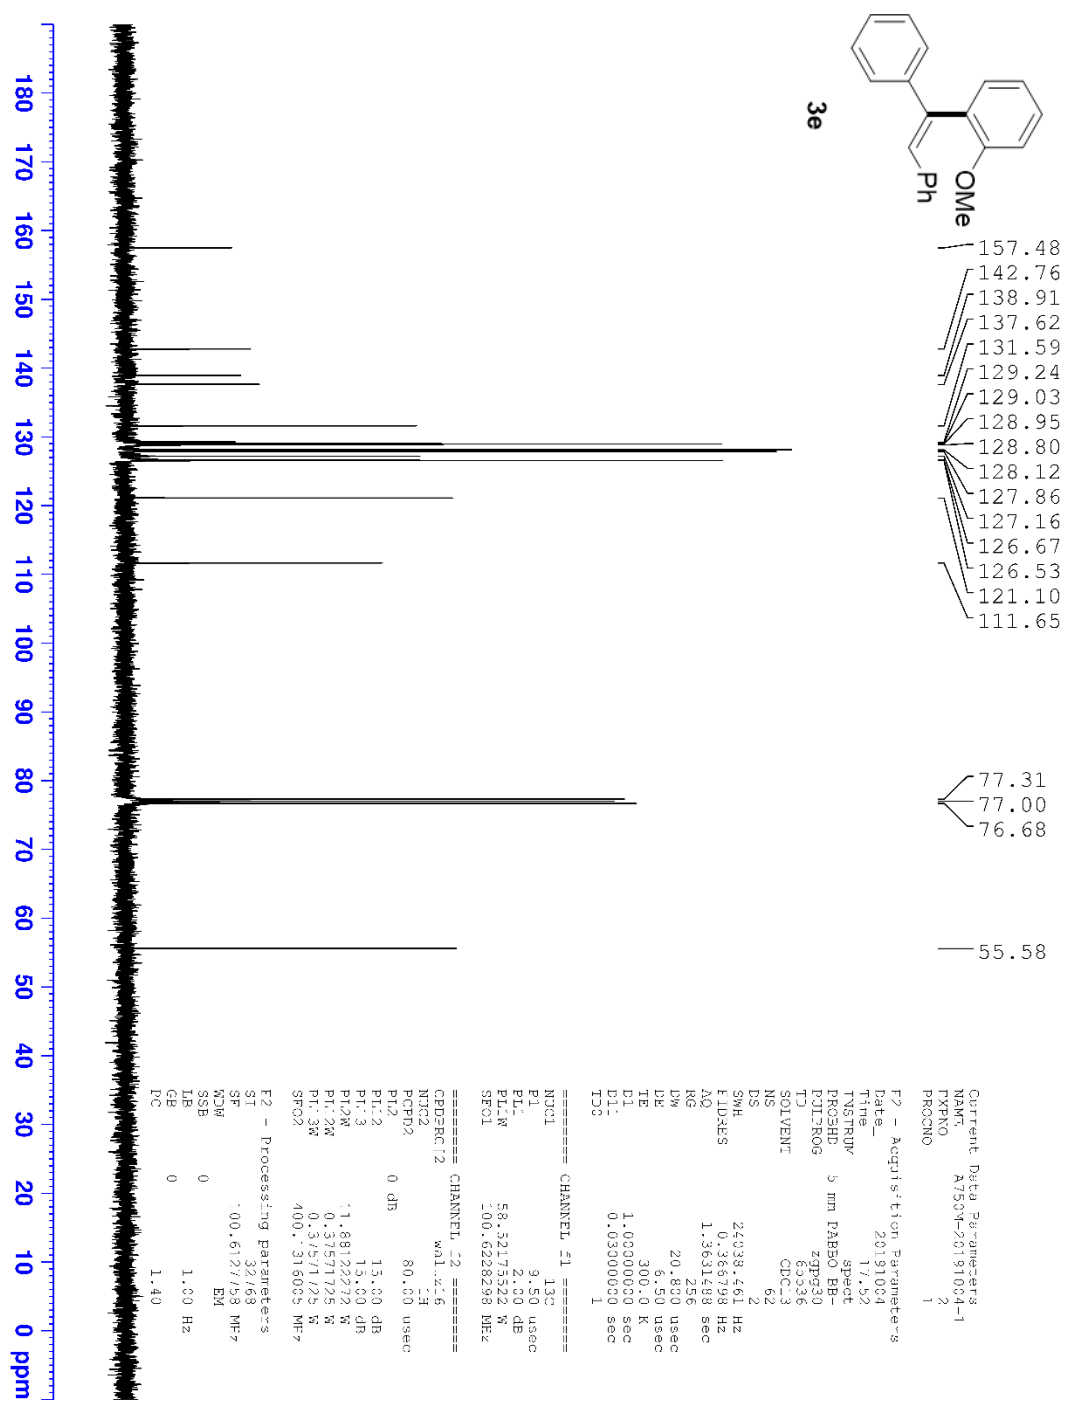

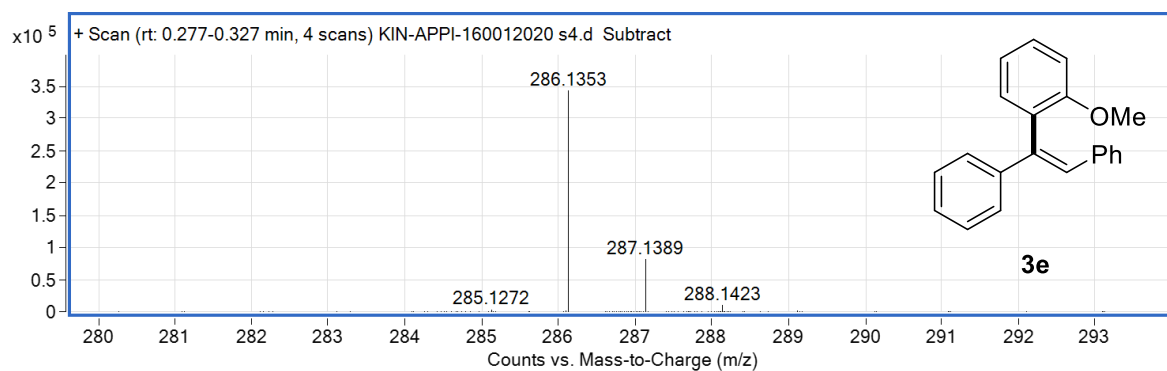

| Mass     | Calc. Mass | mDa  | PPM  | Formula                           |
|----------|------------|------|------|-----------------------------------|
| 286.1353 | 286.1358   | 0.47 | 1.63 | C <sub>21</sub> H <sub>18</sub> O |

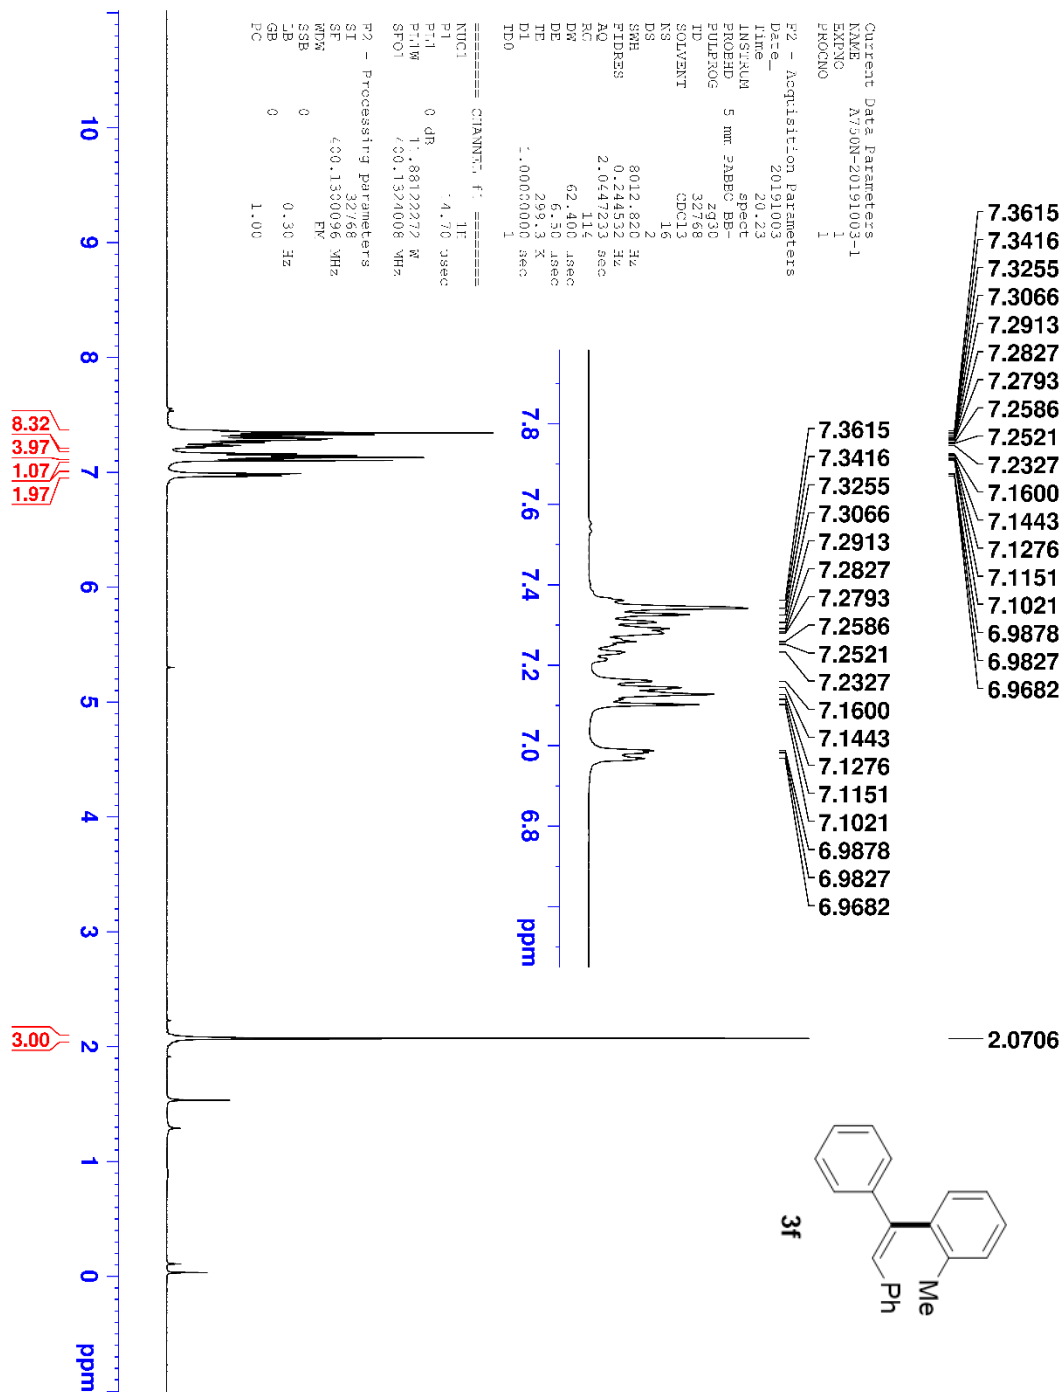

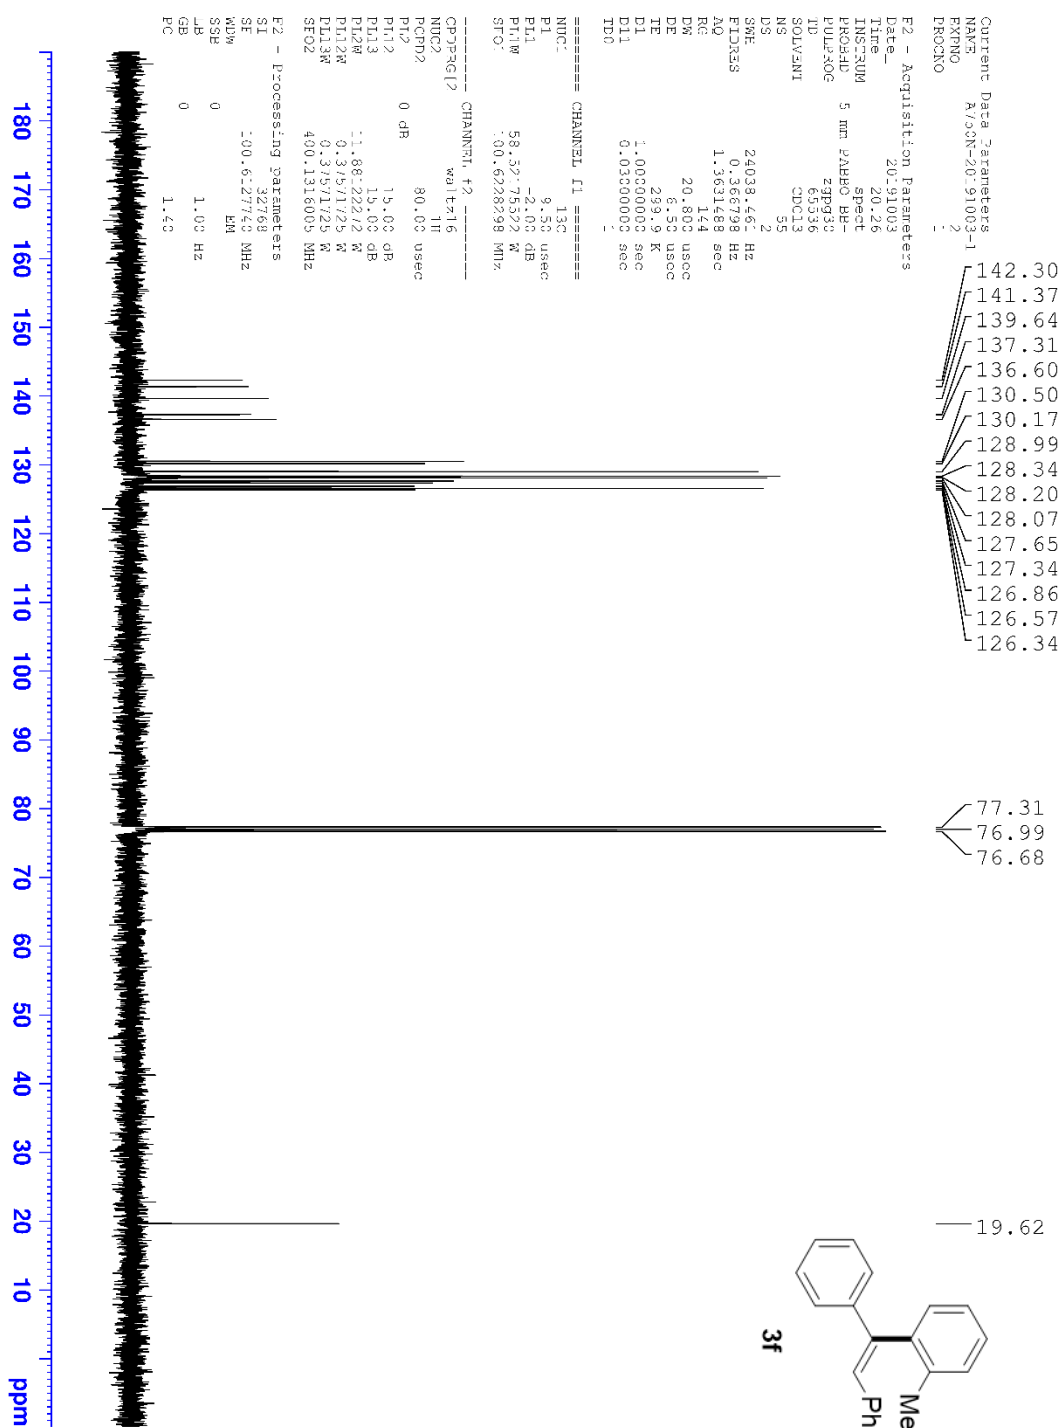

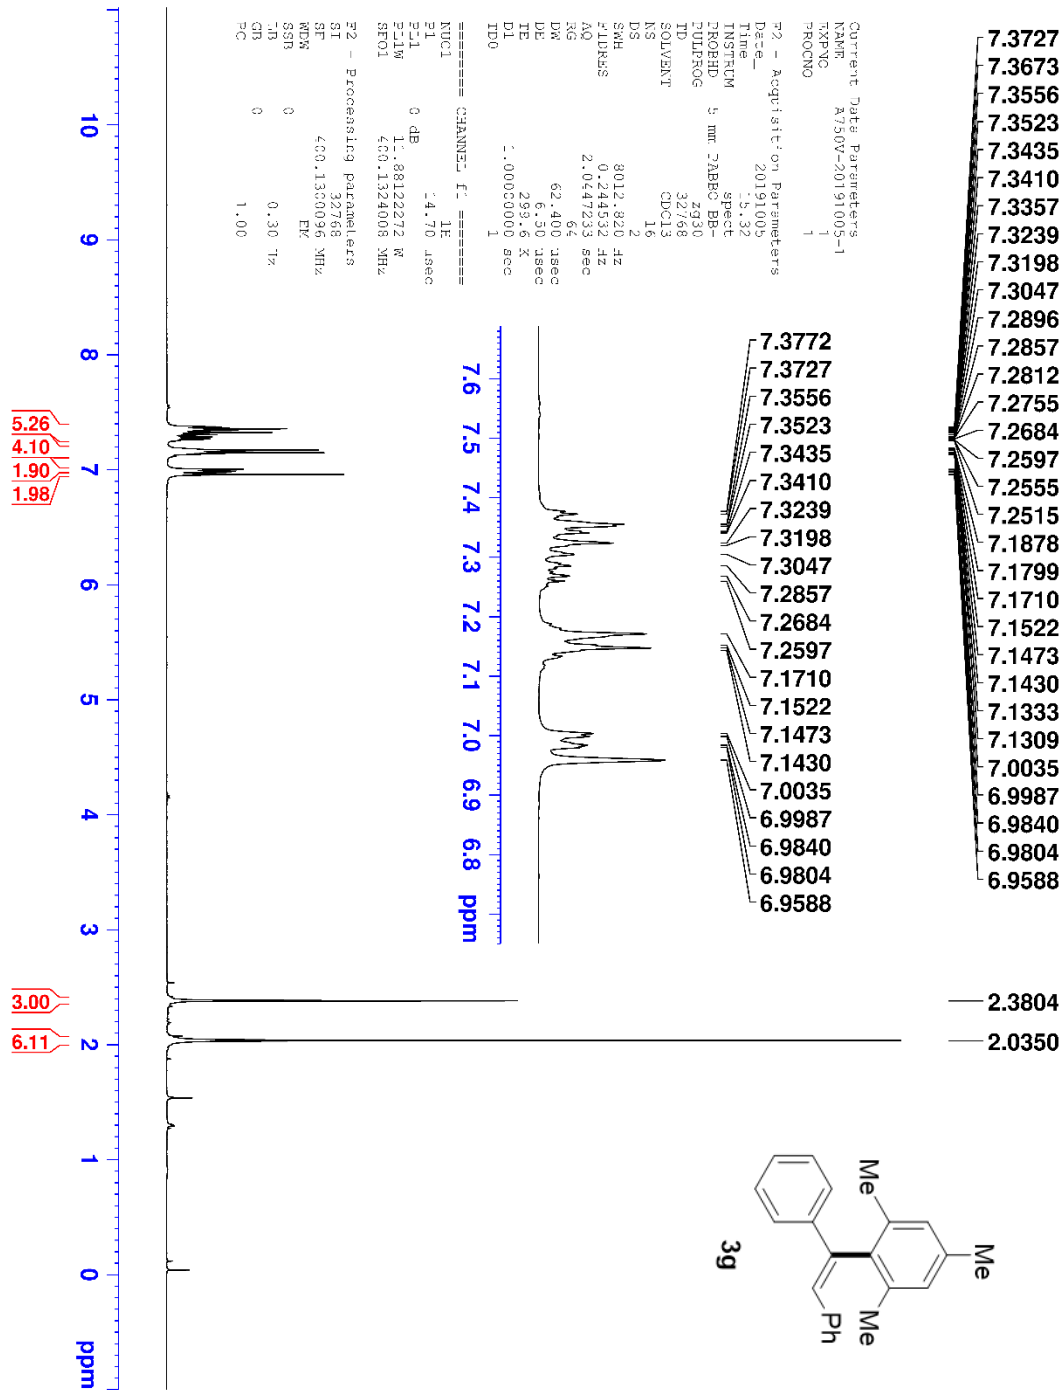

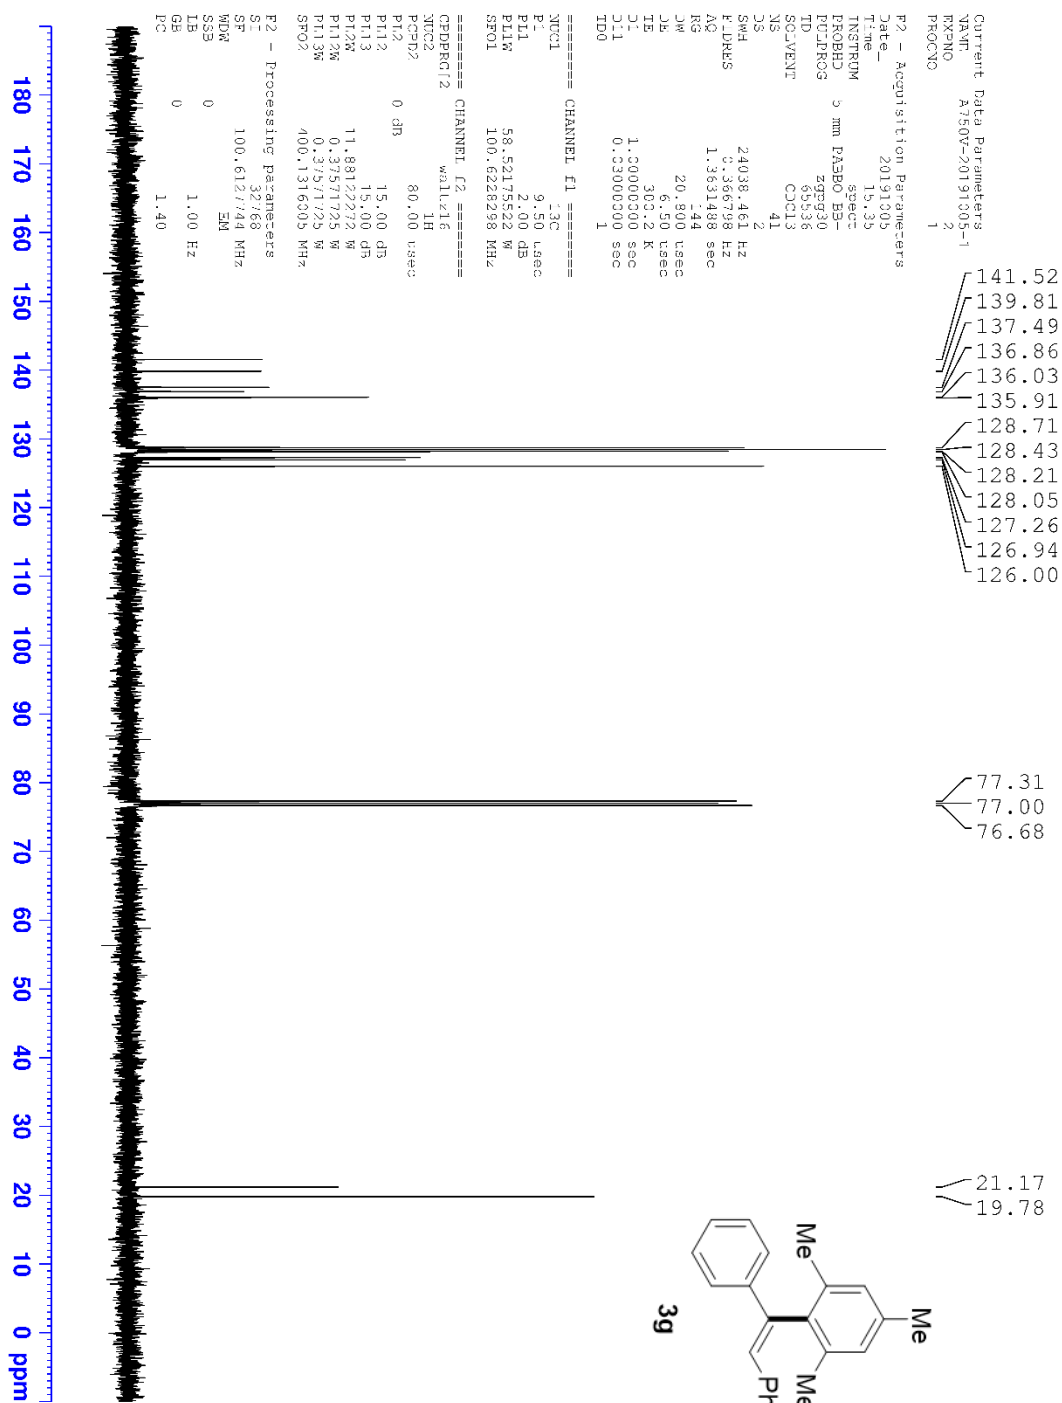

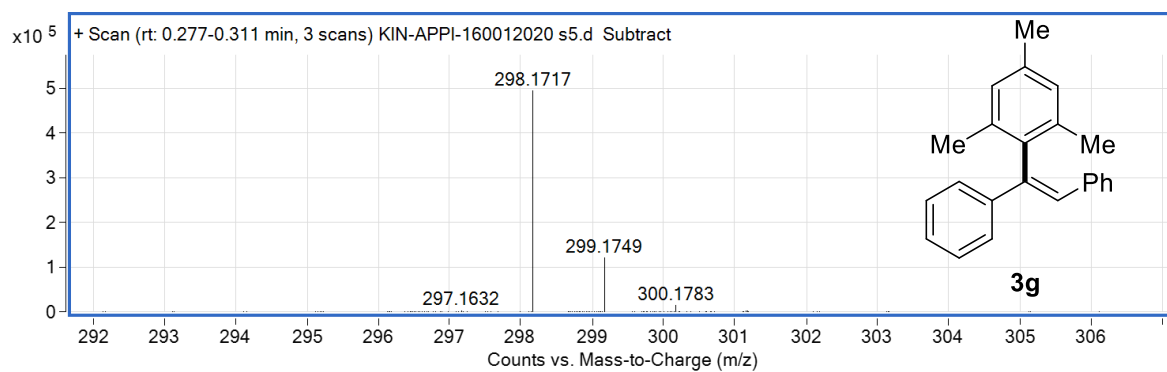

| Mass     | Calc. Mass | mDa  | PPM  | Formula                         |
|----------|------------|------|------|---------------------------------|
| 298.1717 | 298.1722   | 0.45 | 1.51 | C <sub>23</sub> H <sub>22</sub> |

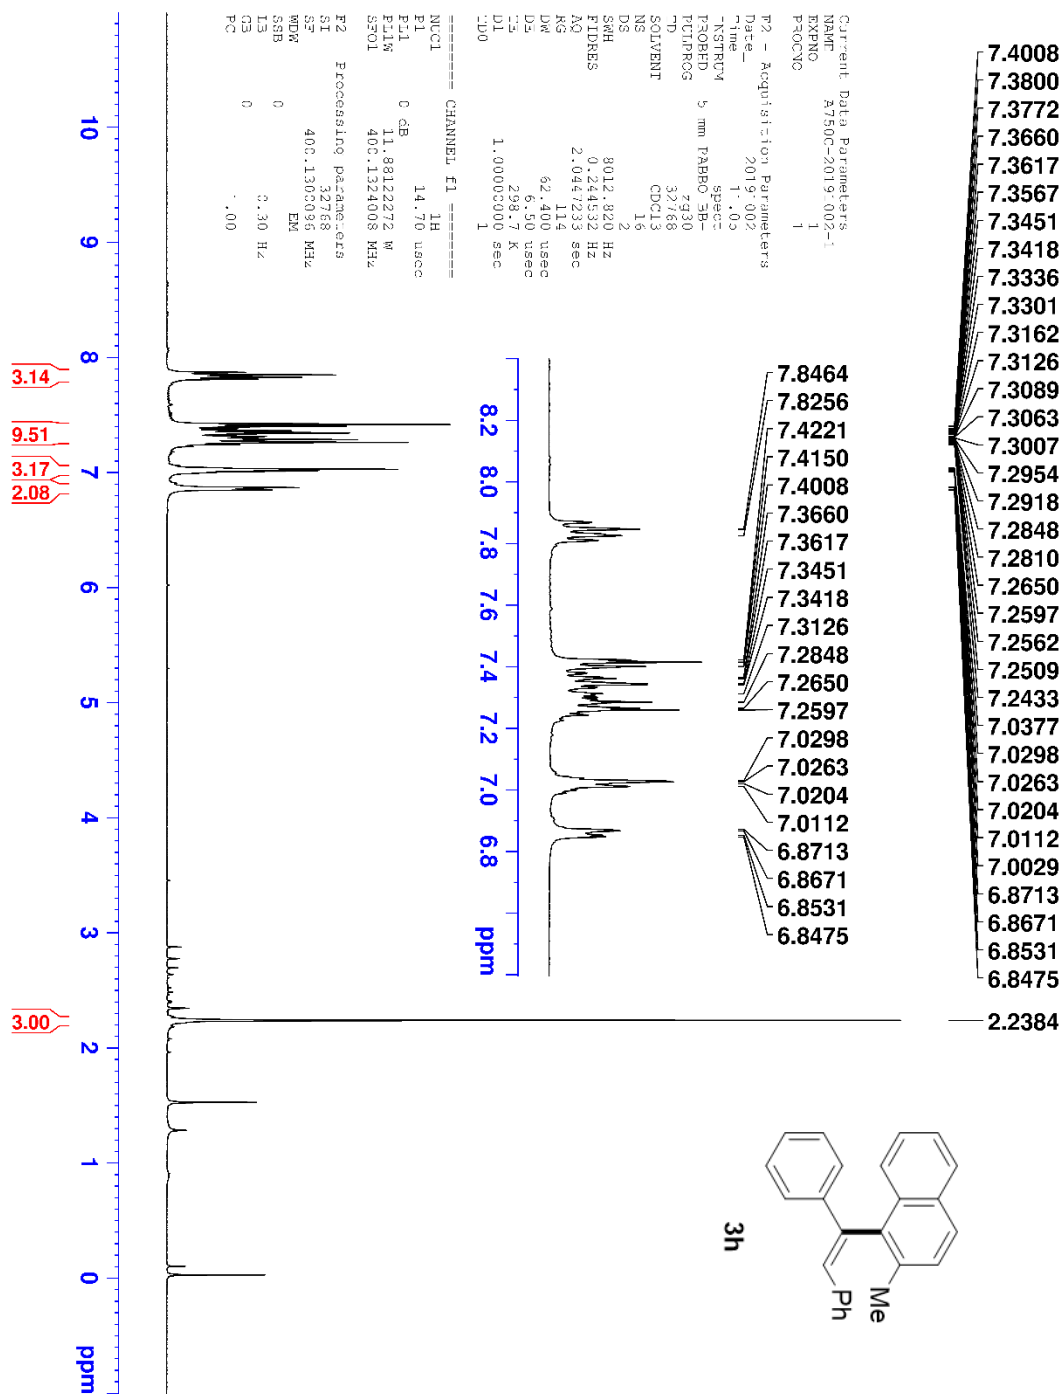



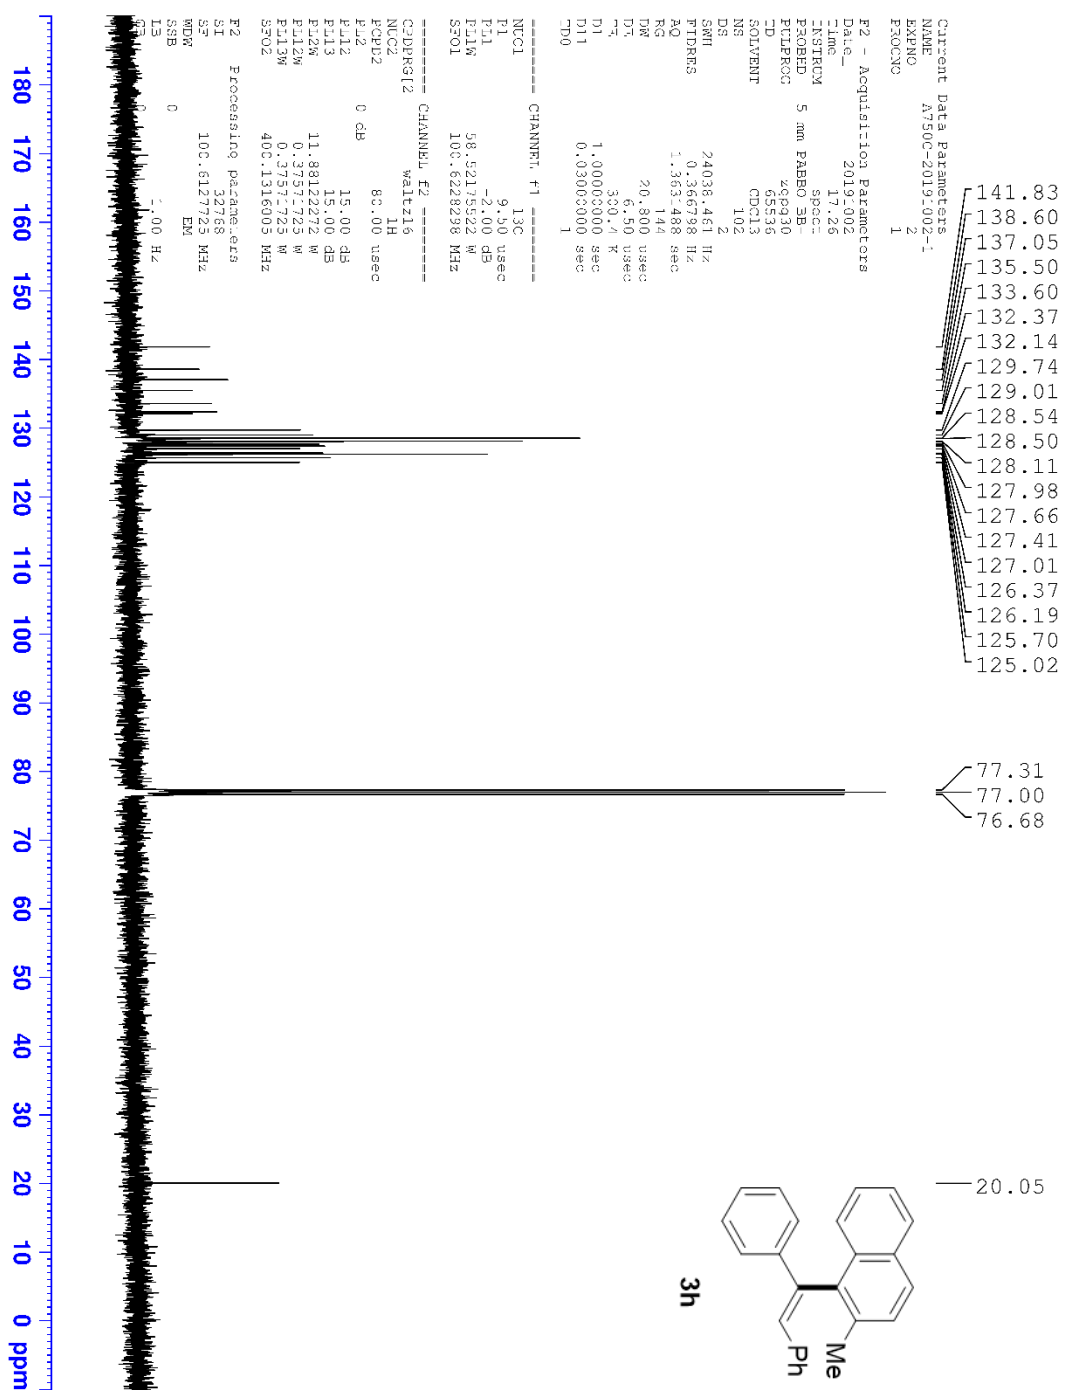

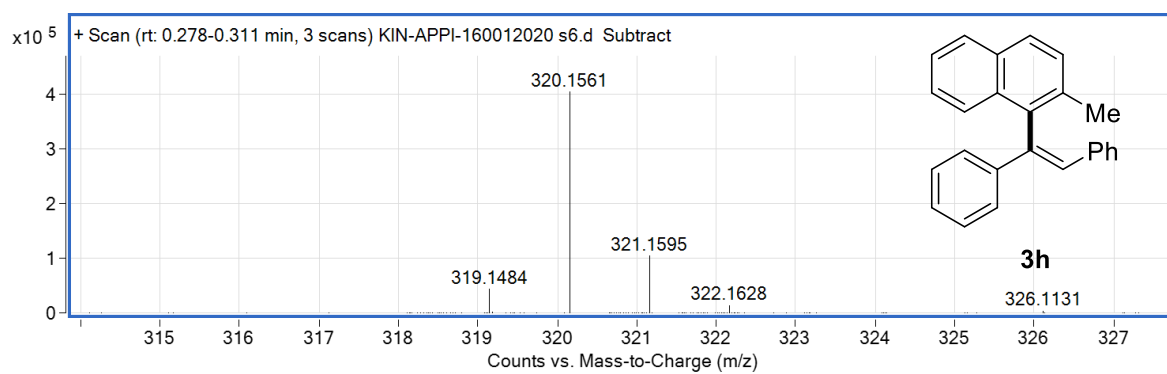

| Mass     | Calc. Mass | mDa | PPM  | Formula                         |
|----------|------------|-----|------|---------------------------------|
| 320.1561 | 320.1565   | 0.4 | 1.25 | C <sub>25</sub> H <sub>20</sub> |

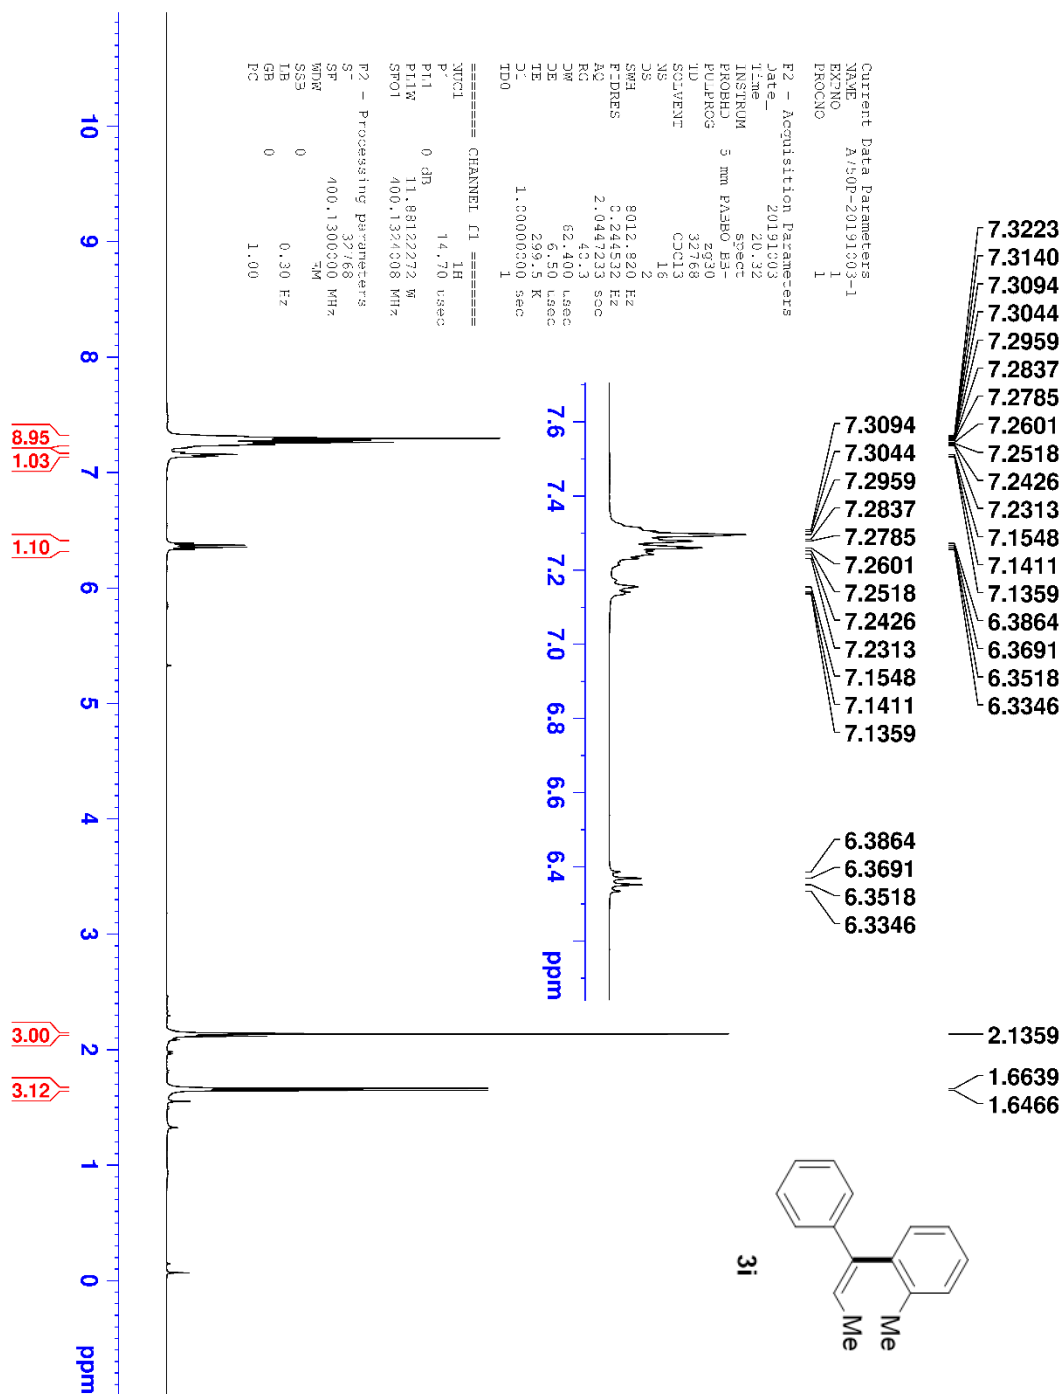

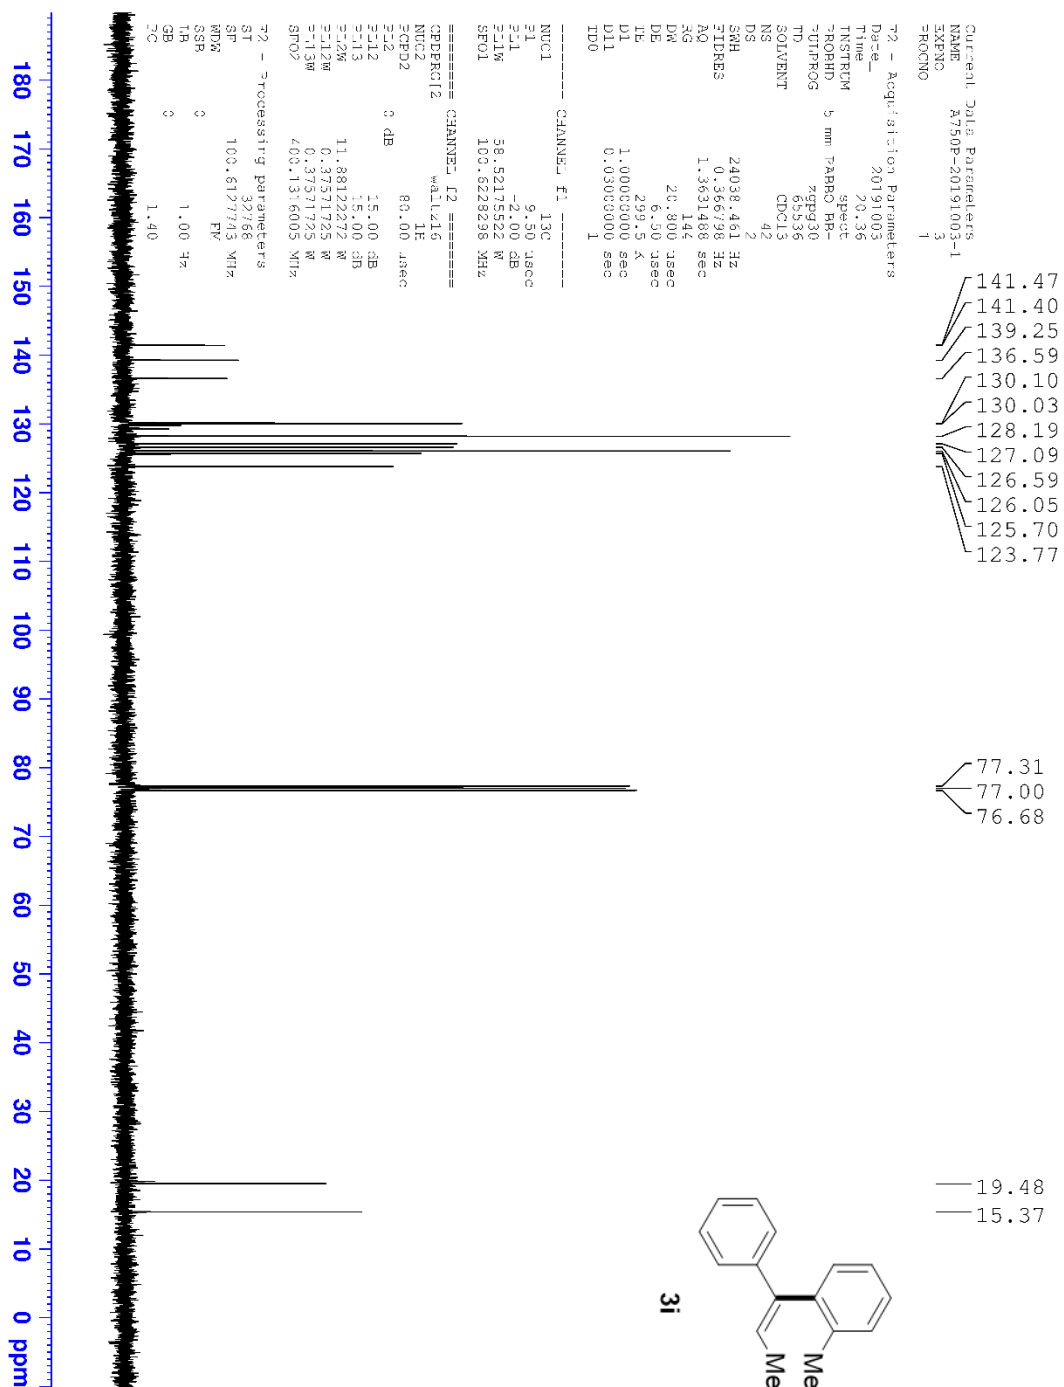

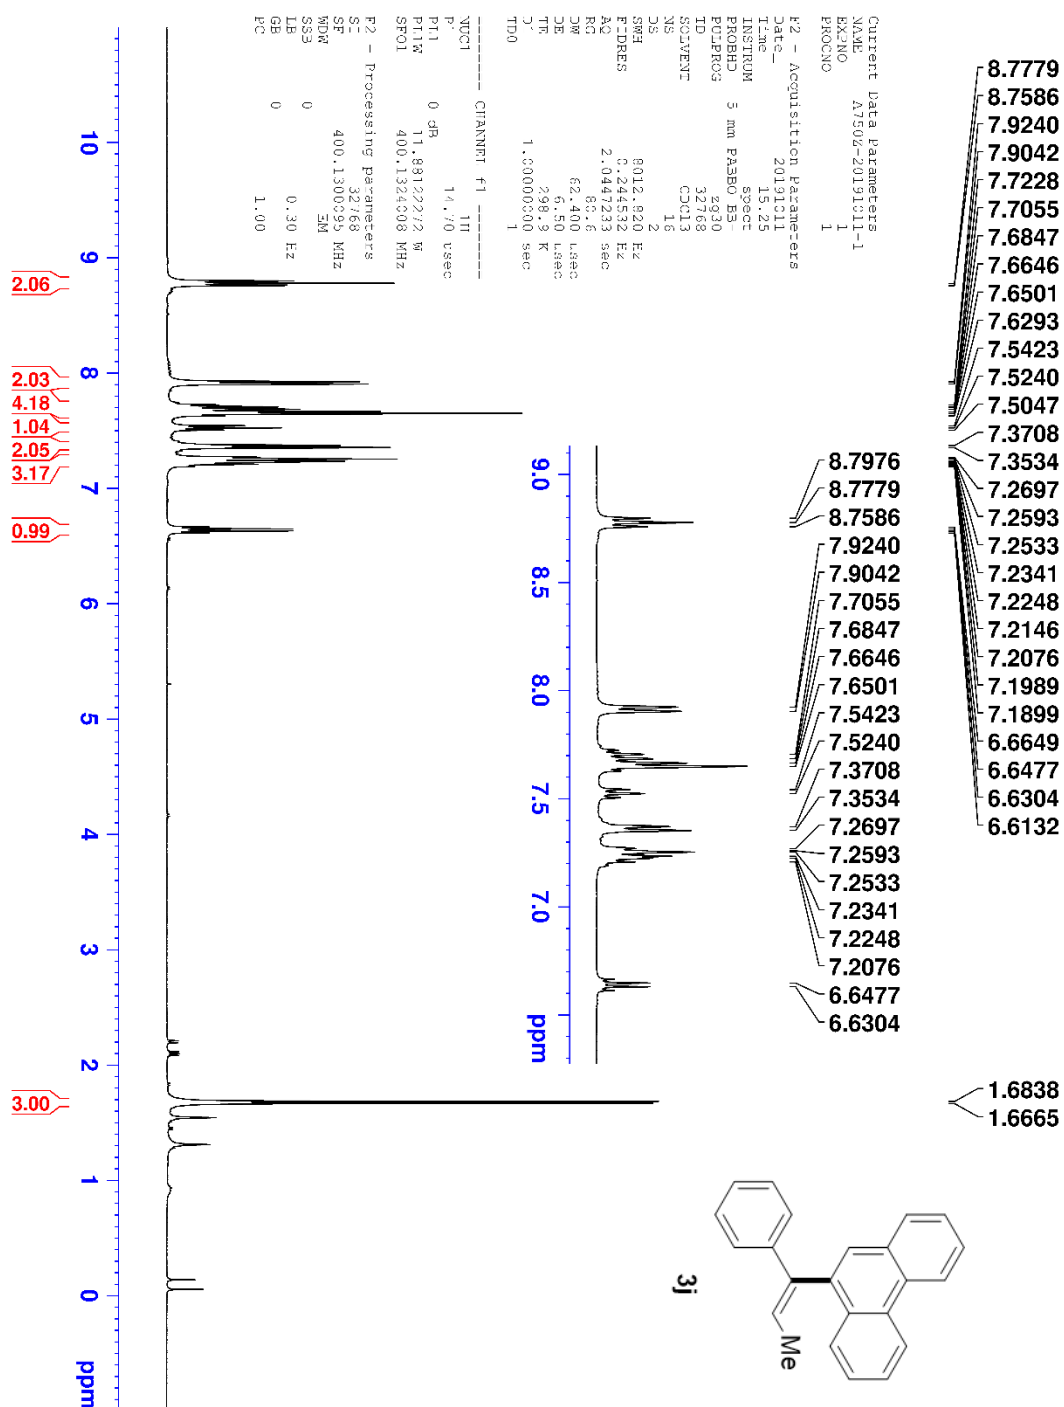

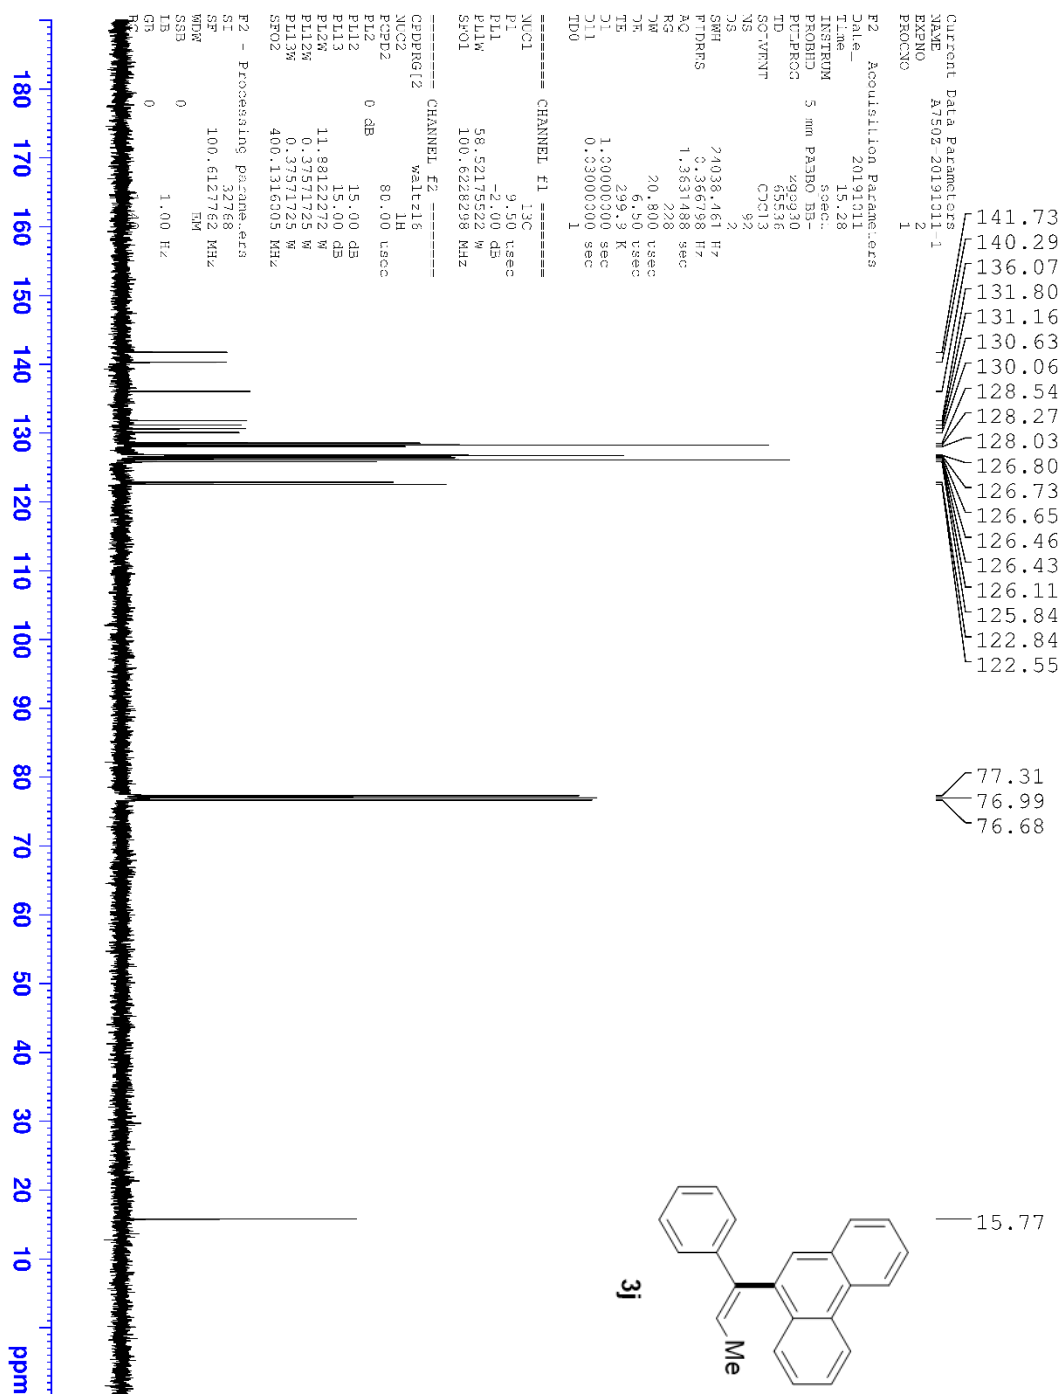

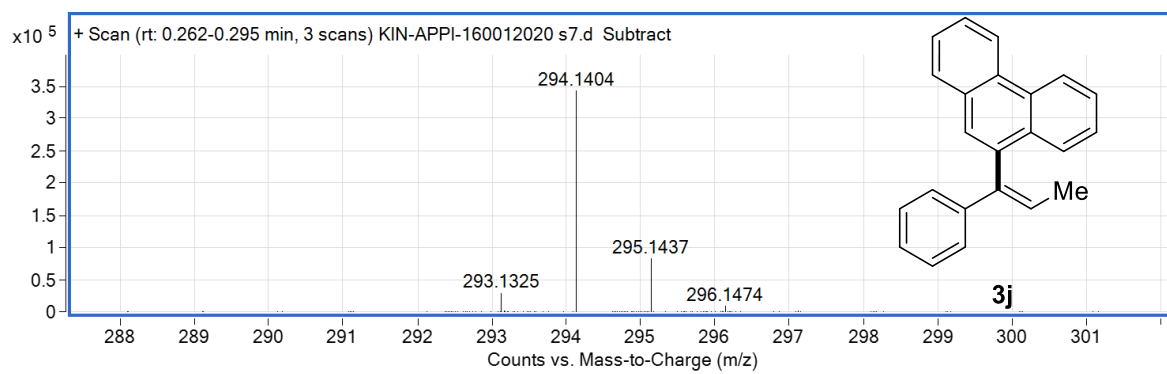

| Mass     | Calc. Mass | mDa  | PPM  | Formula                         |
|----------|------------|------|------|---------------------------------|
| 294.1404 | 294.1409   | 0.45 | 1.53 | C <sub>23</sub> H <sub>18</sub> |

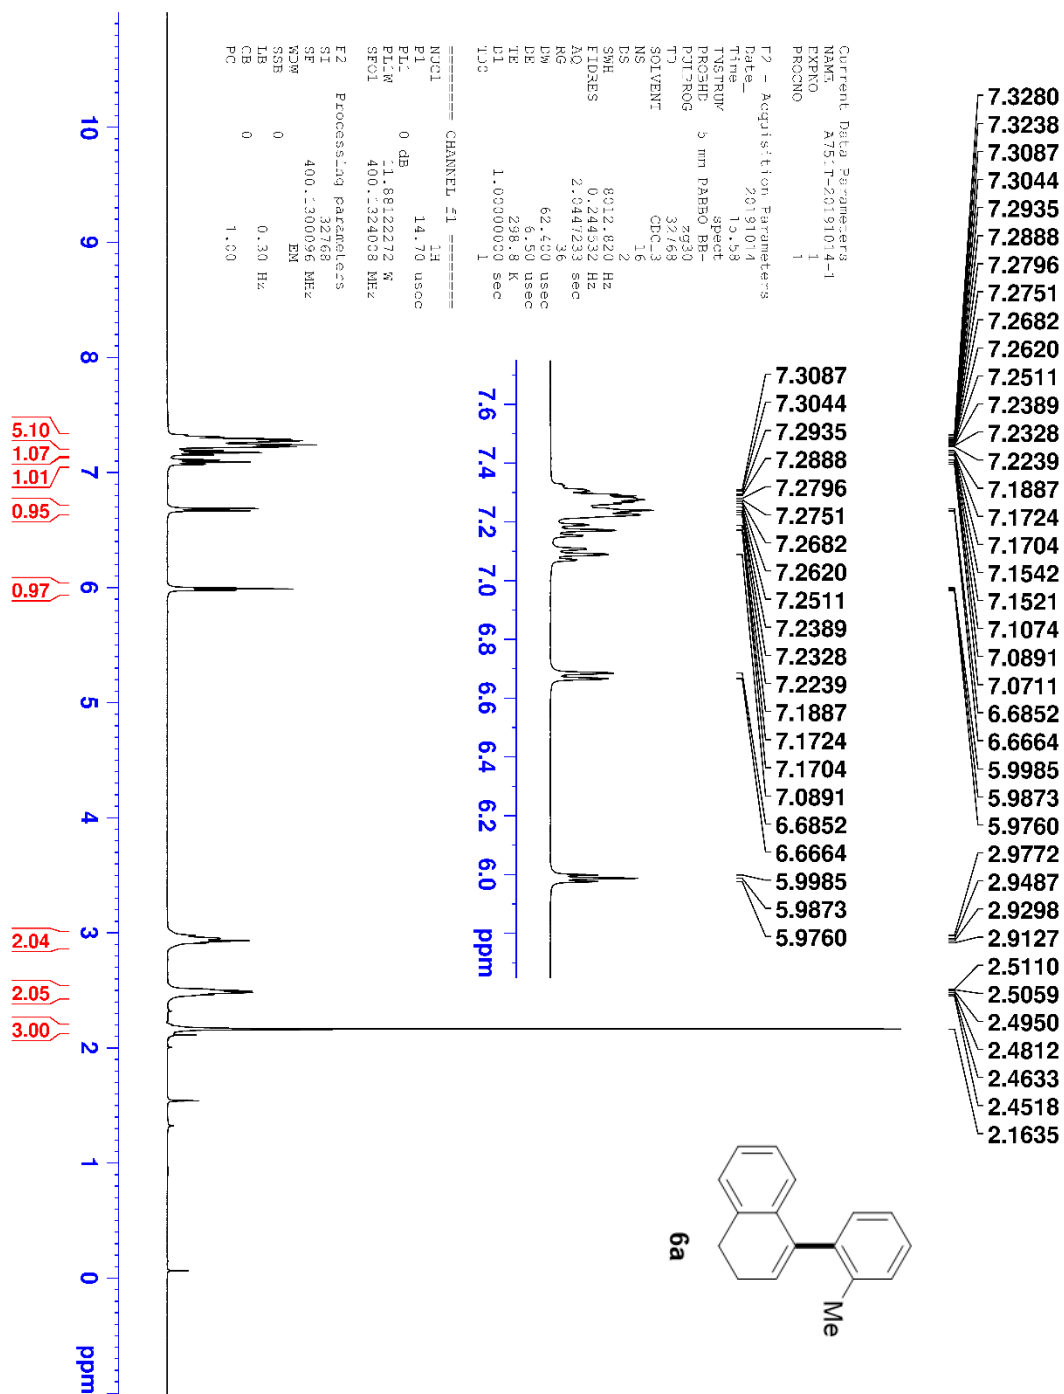



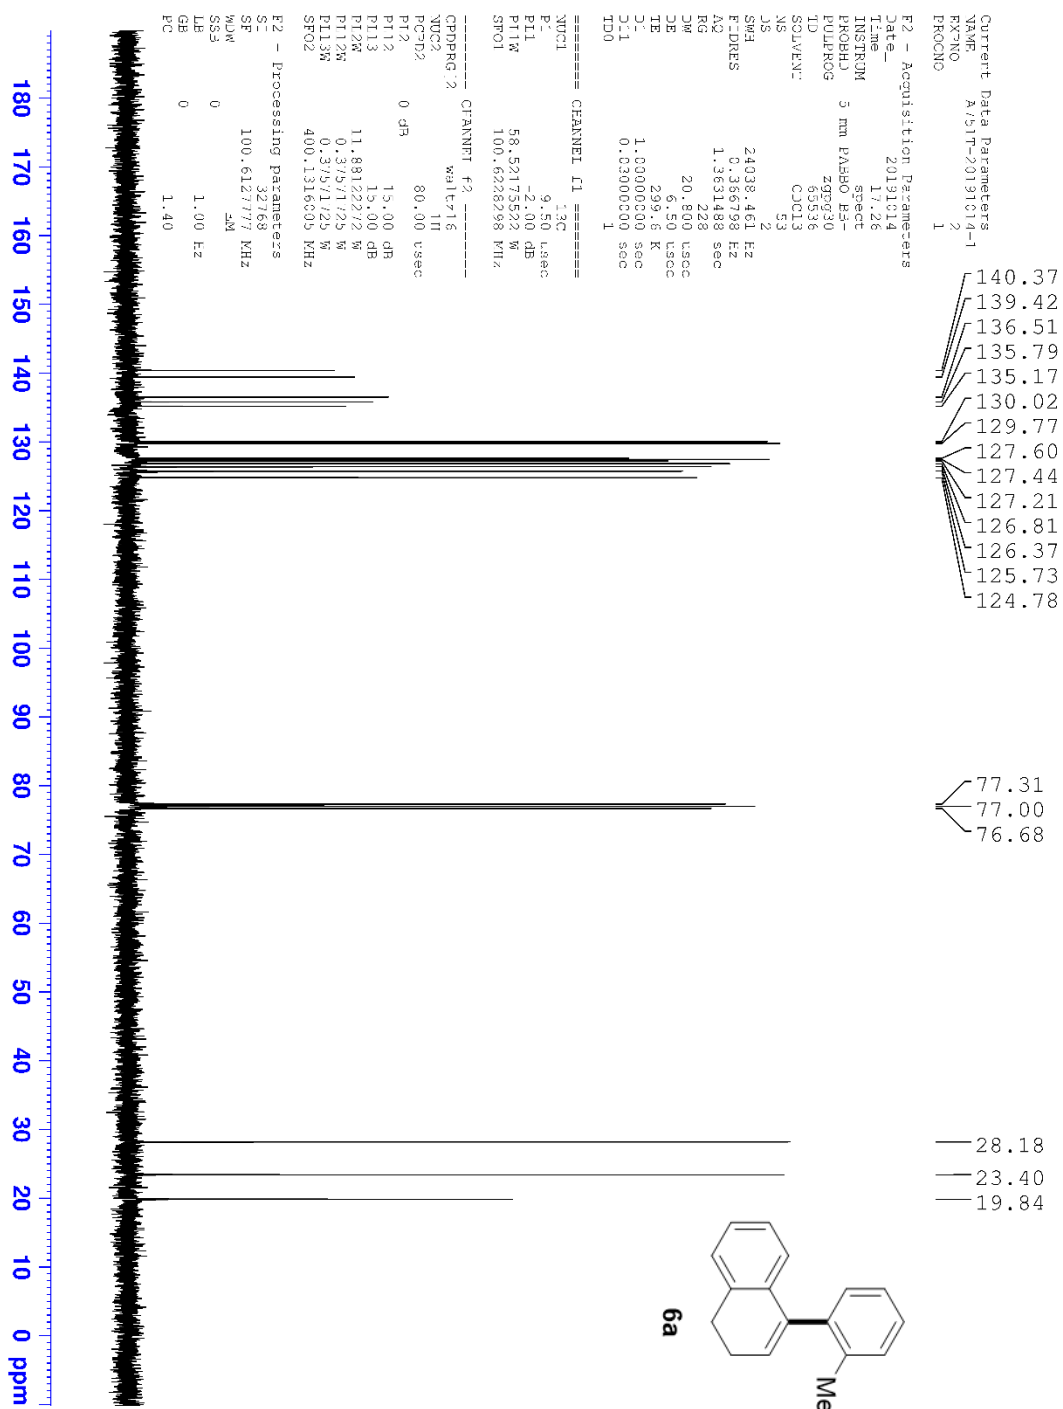

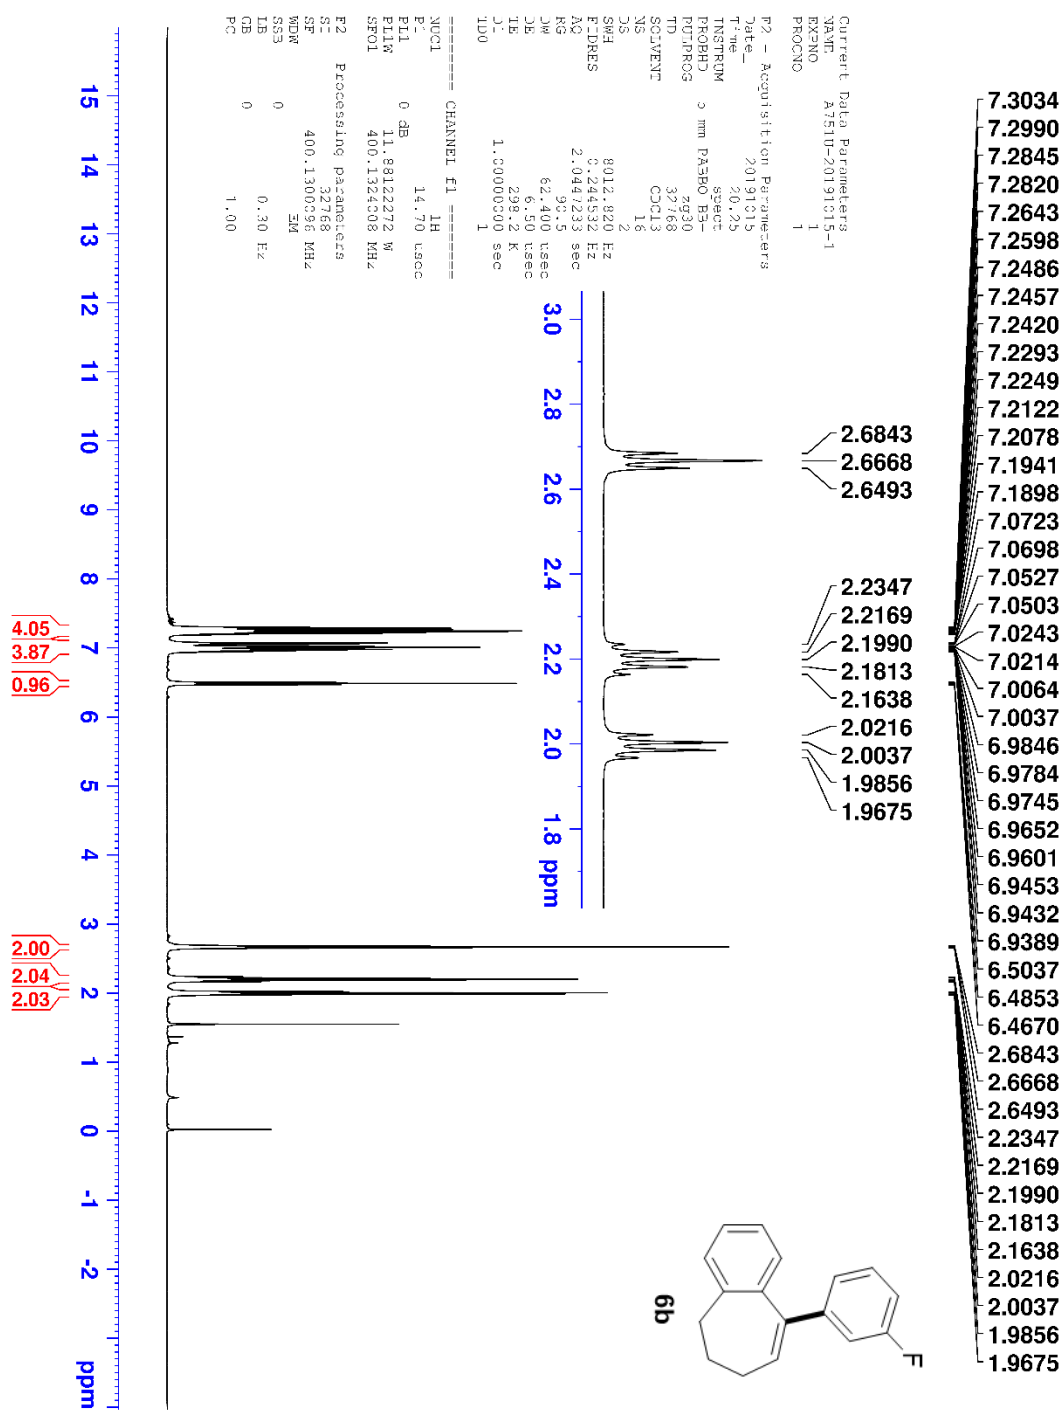

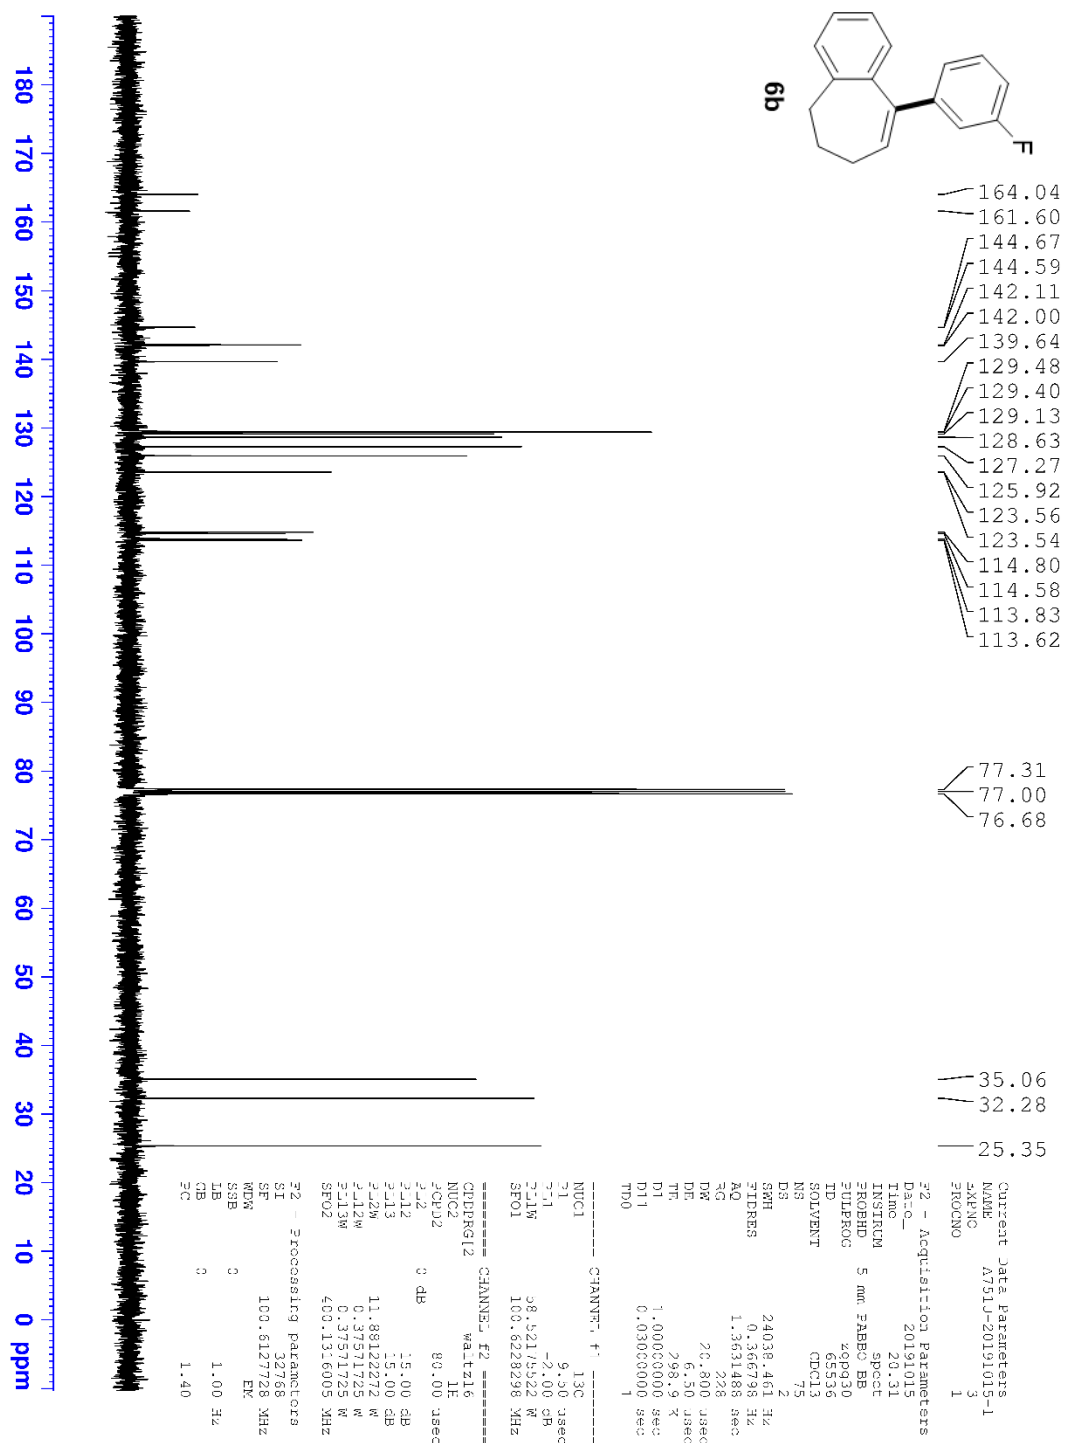

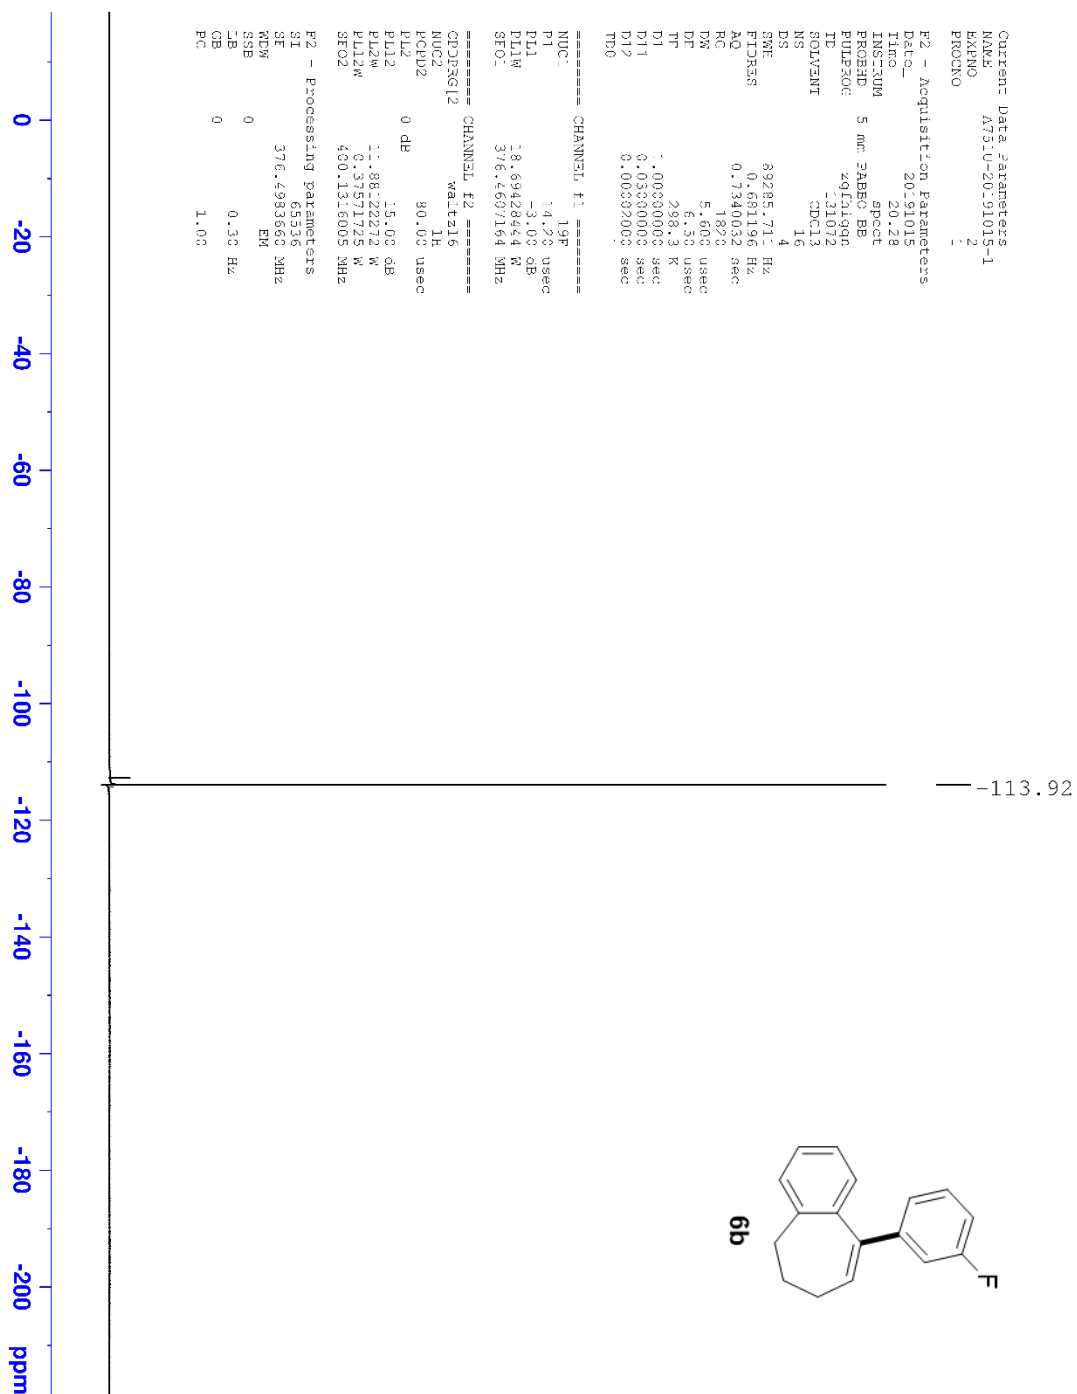

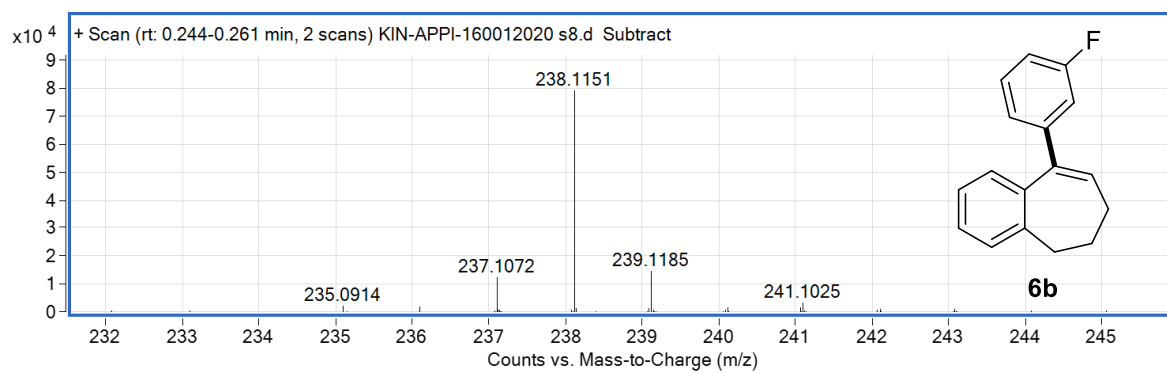

| Mass     | Calc. Mass | mDa  | PPM  | Formula                           |
|----------|------------|------|------|-----------------------------------|
| 238.1151 | 238.1158   | 0.68 | 2.85 | C <sub>17</sub> H <sub>15</sub> F |

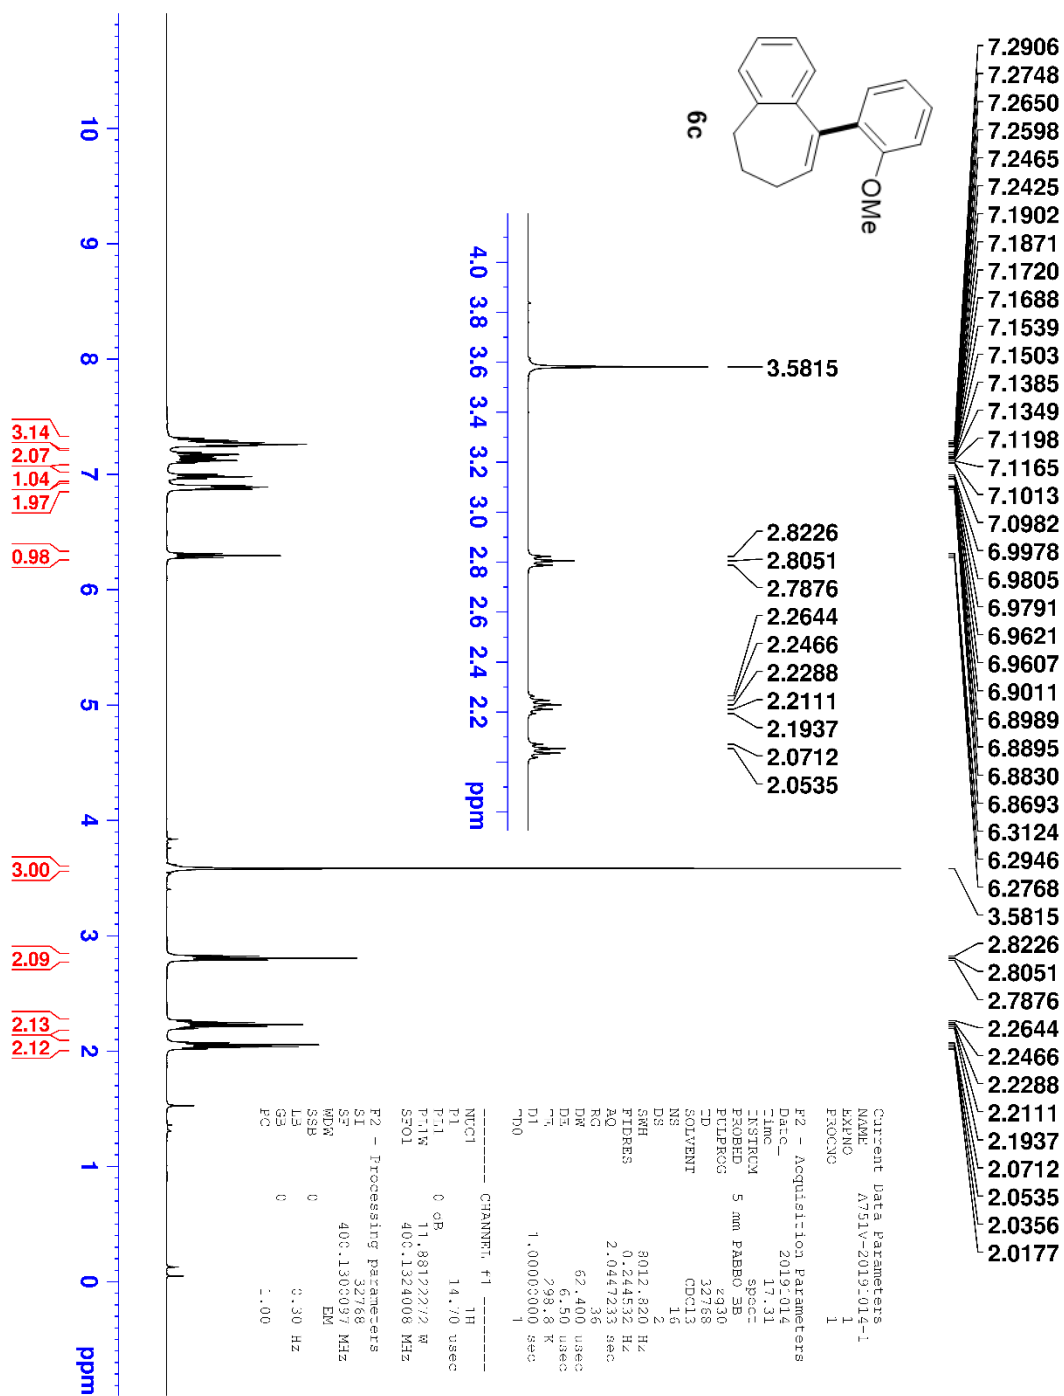

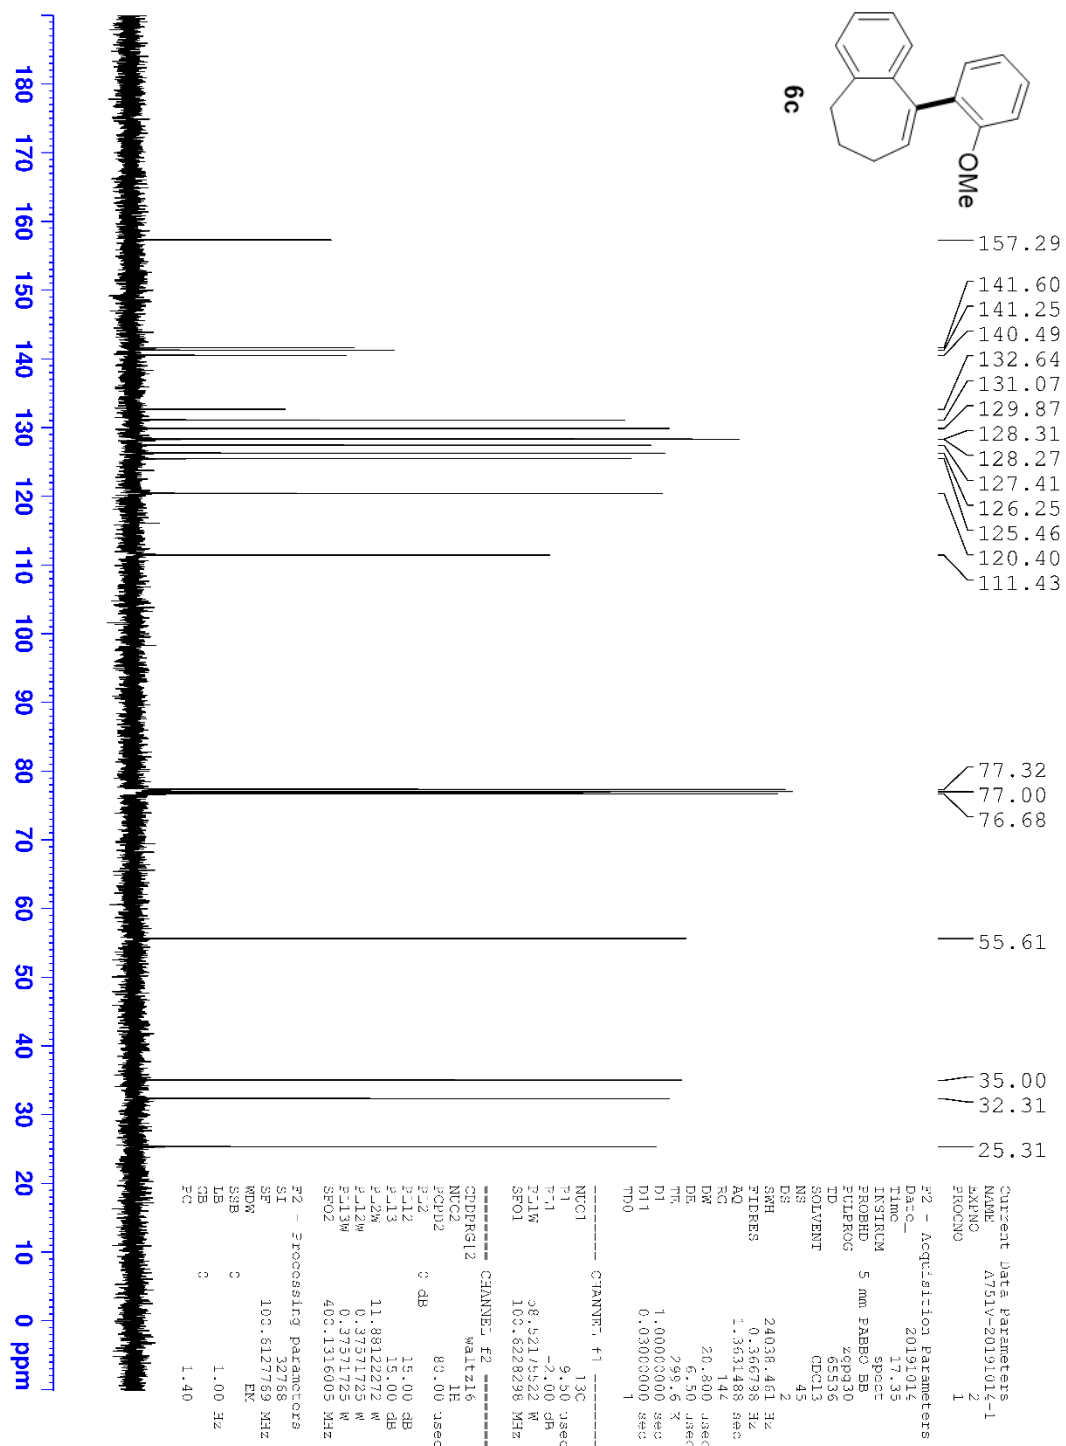

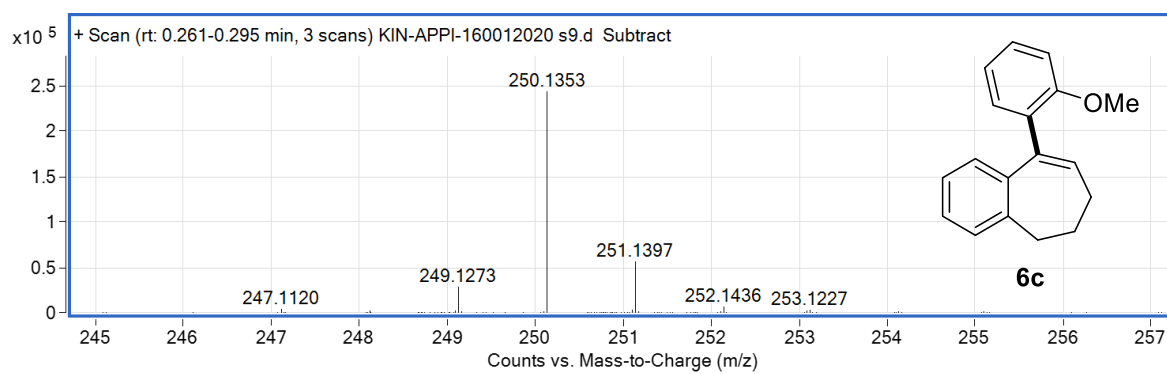

| Mass     | Calc. Mass | mDa  | PPM  | Formula                           |
|----------|------------|------|------|-----------------------------------|
| 250.1353 | 250.1358   | 0.47 | 1.86 | C <sub>18</sub> H <sub>18</sub> O |



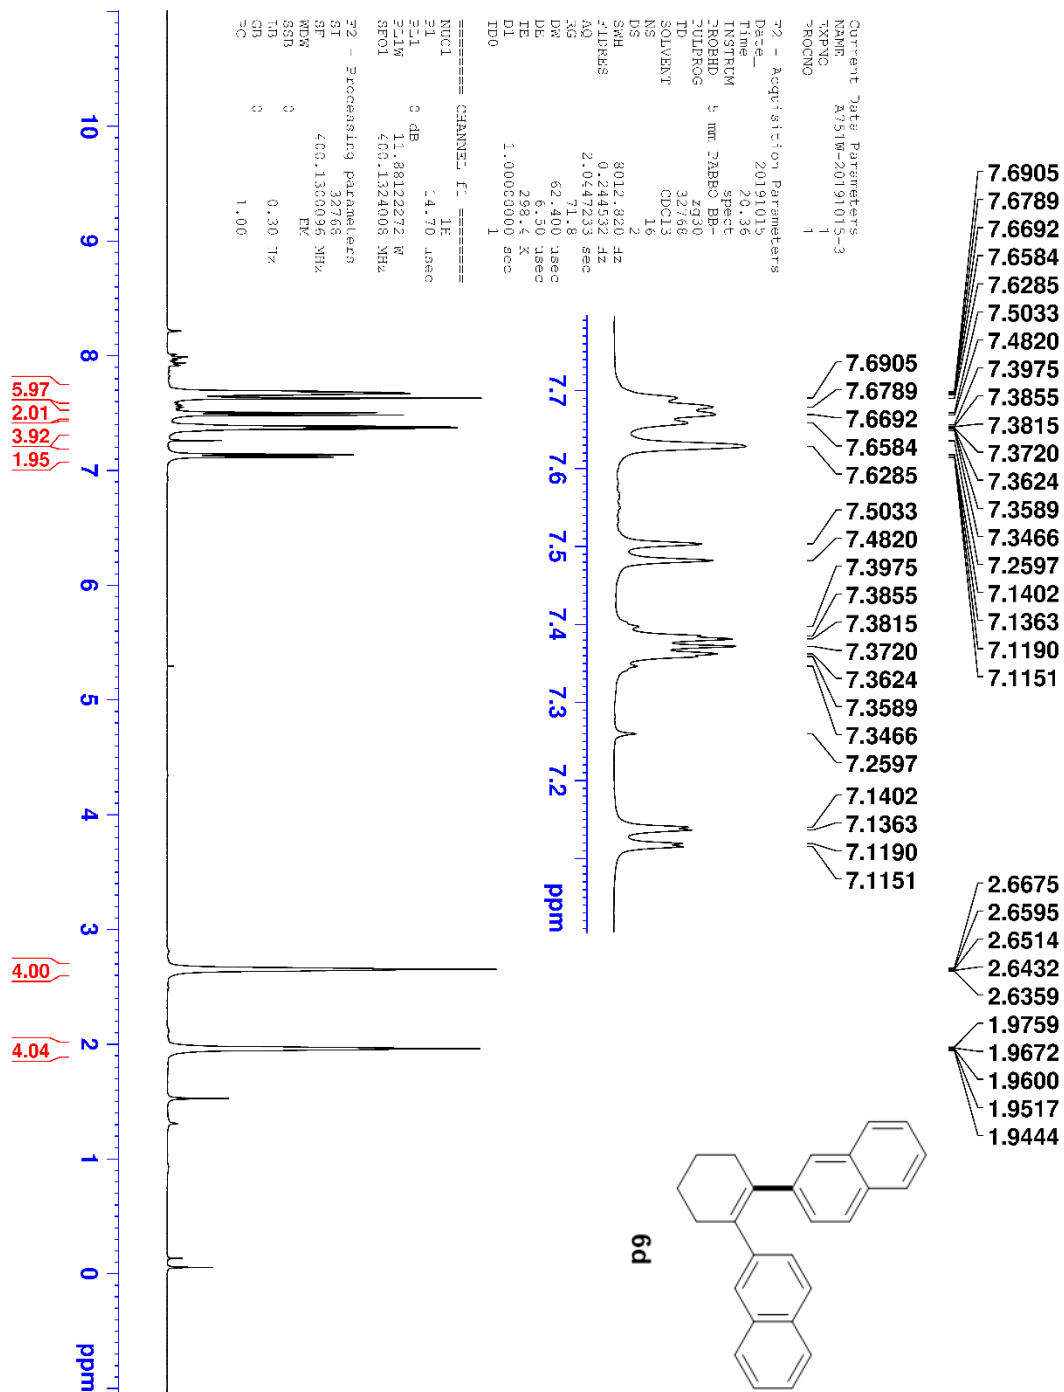

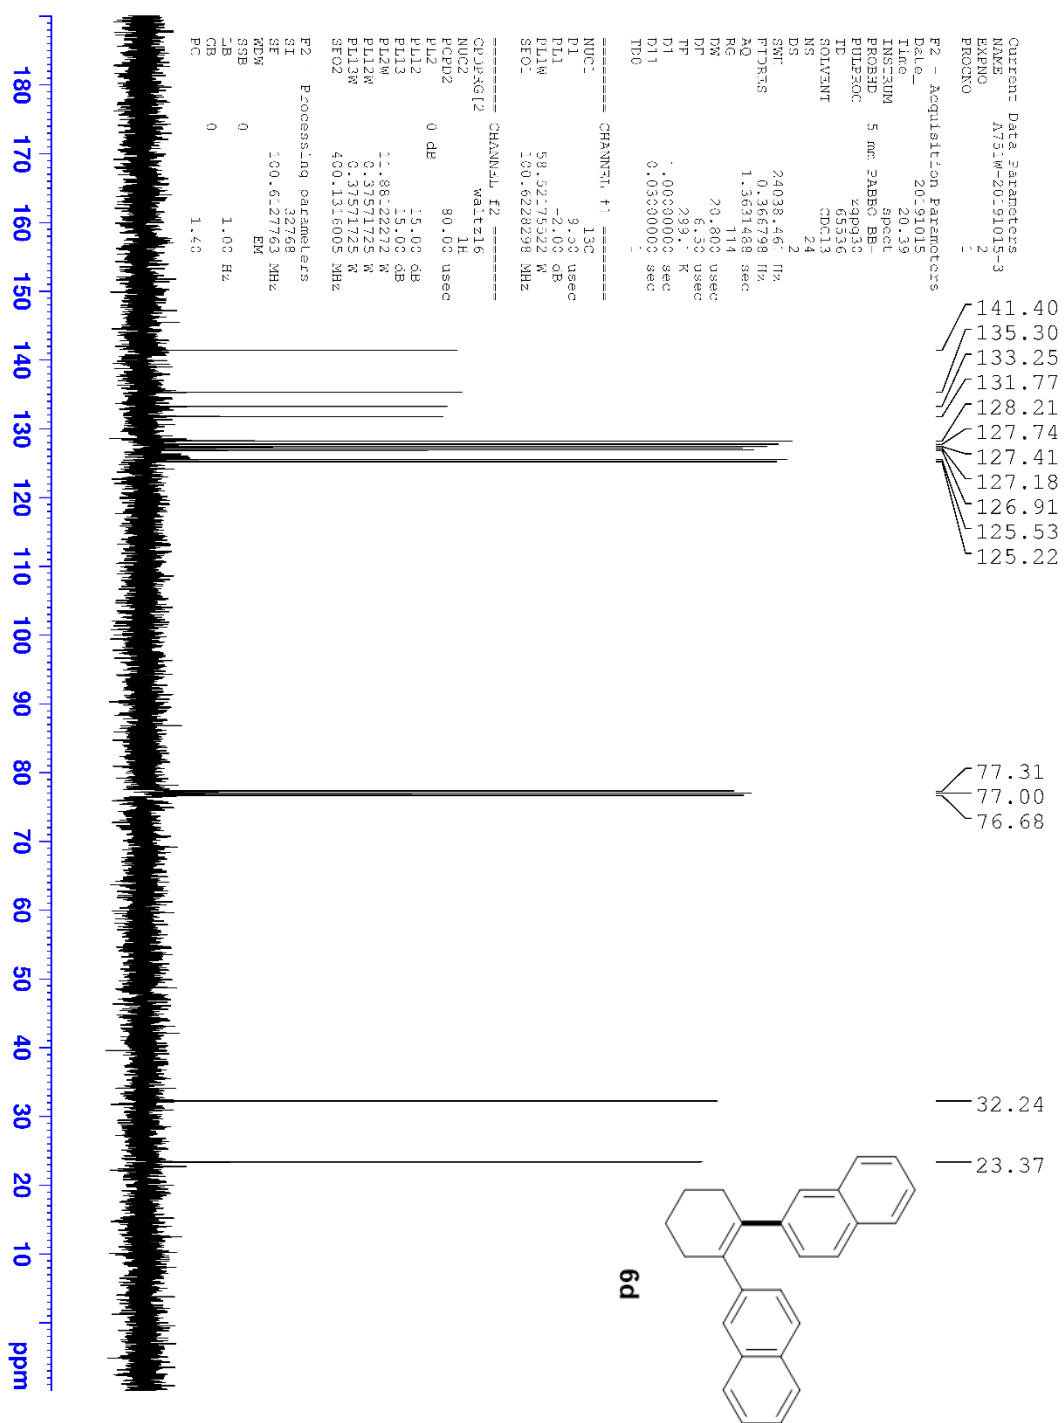

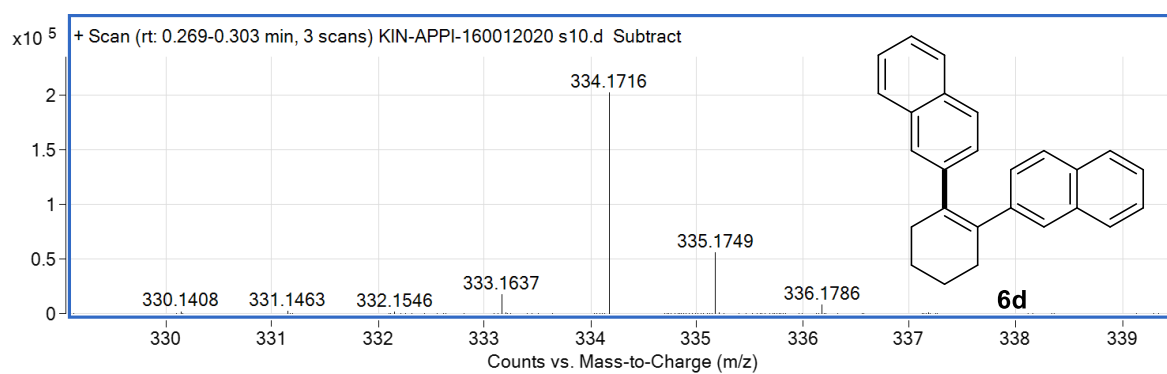

| Mass     | Calc. Mass | mDa  | PPM  | Formula                         |
|----------|------------|------|------|---------------------------------|
| 334.1716 | 334.1722   | 0.55 | 1.65 | C <sub>26</sub> H <sub>22</sub> |

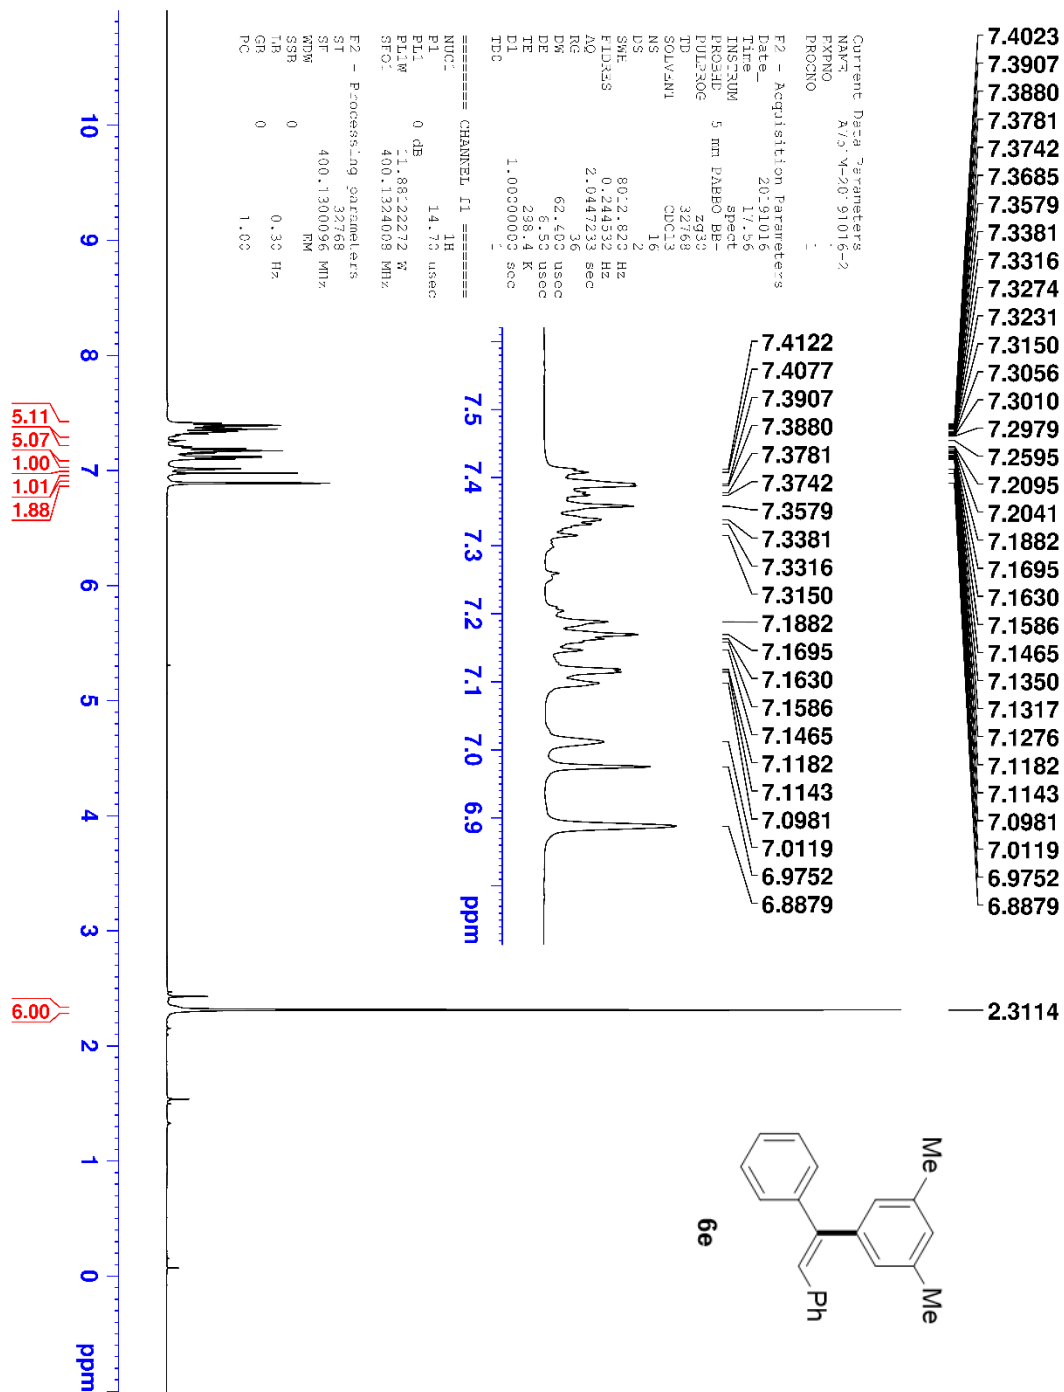

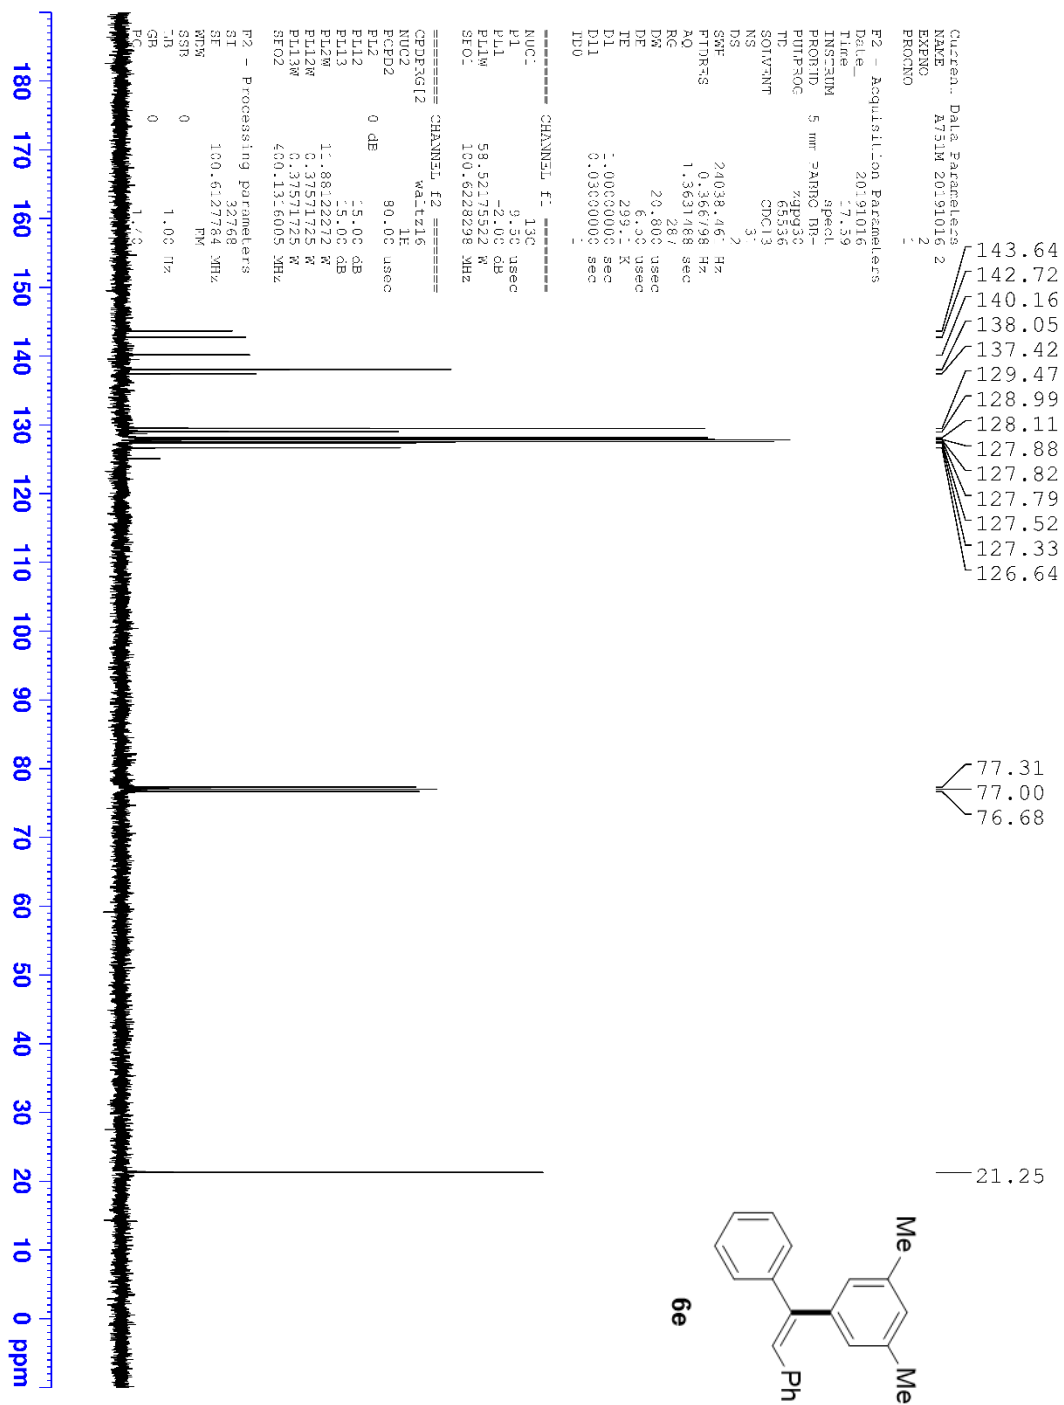

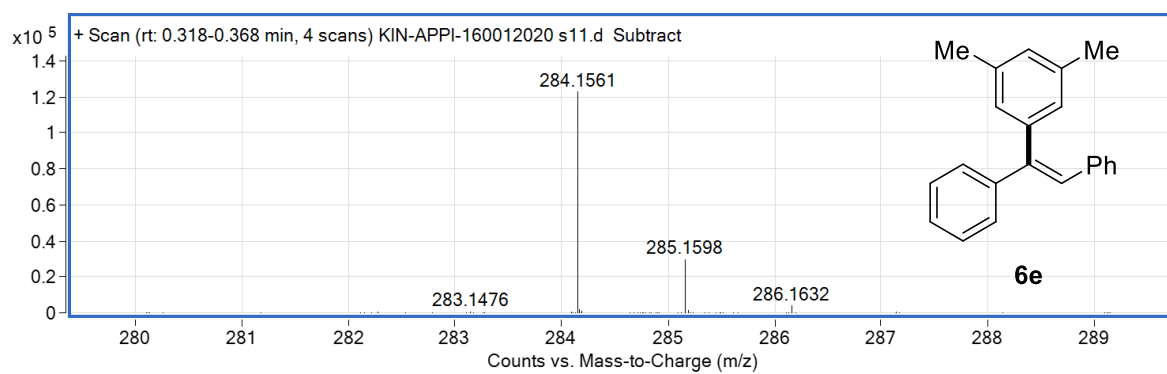

| Mass     | Calc. Mass | mDa | PPM  | Formula                         |
|----------|------------|-----|------|---------------------------------|
| 284.1561 | 284.1565   | 0.4 | 1.41 | C <sub>22</sub> H <sub>20</sub> |

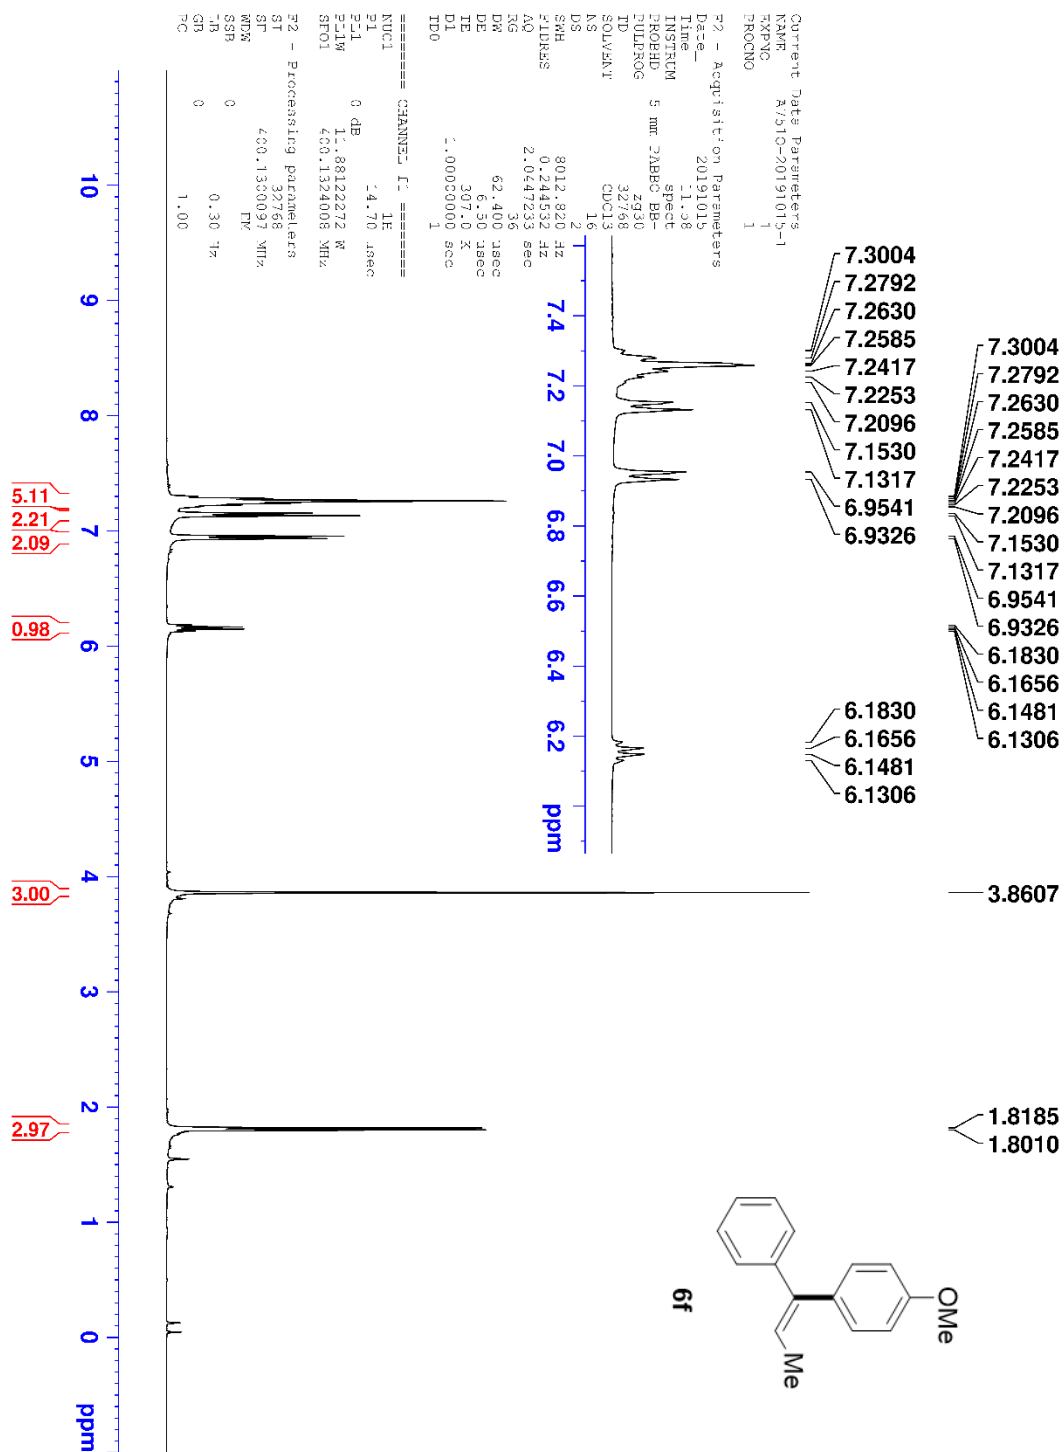

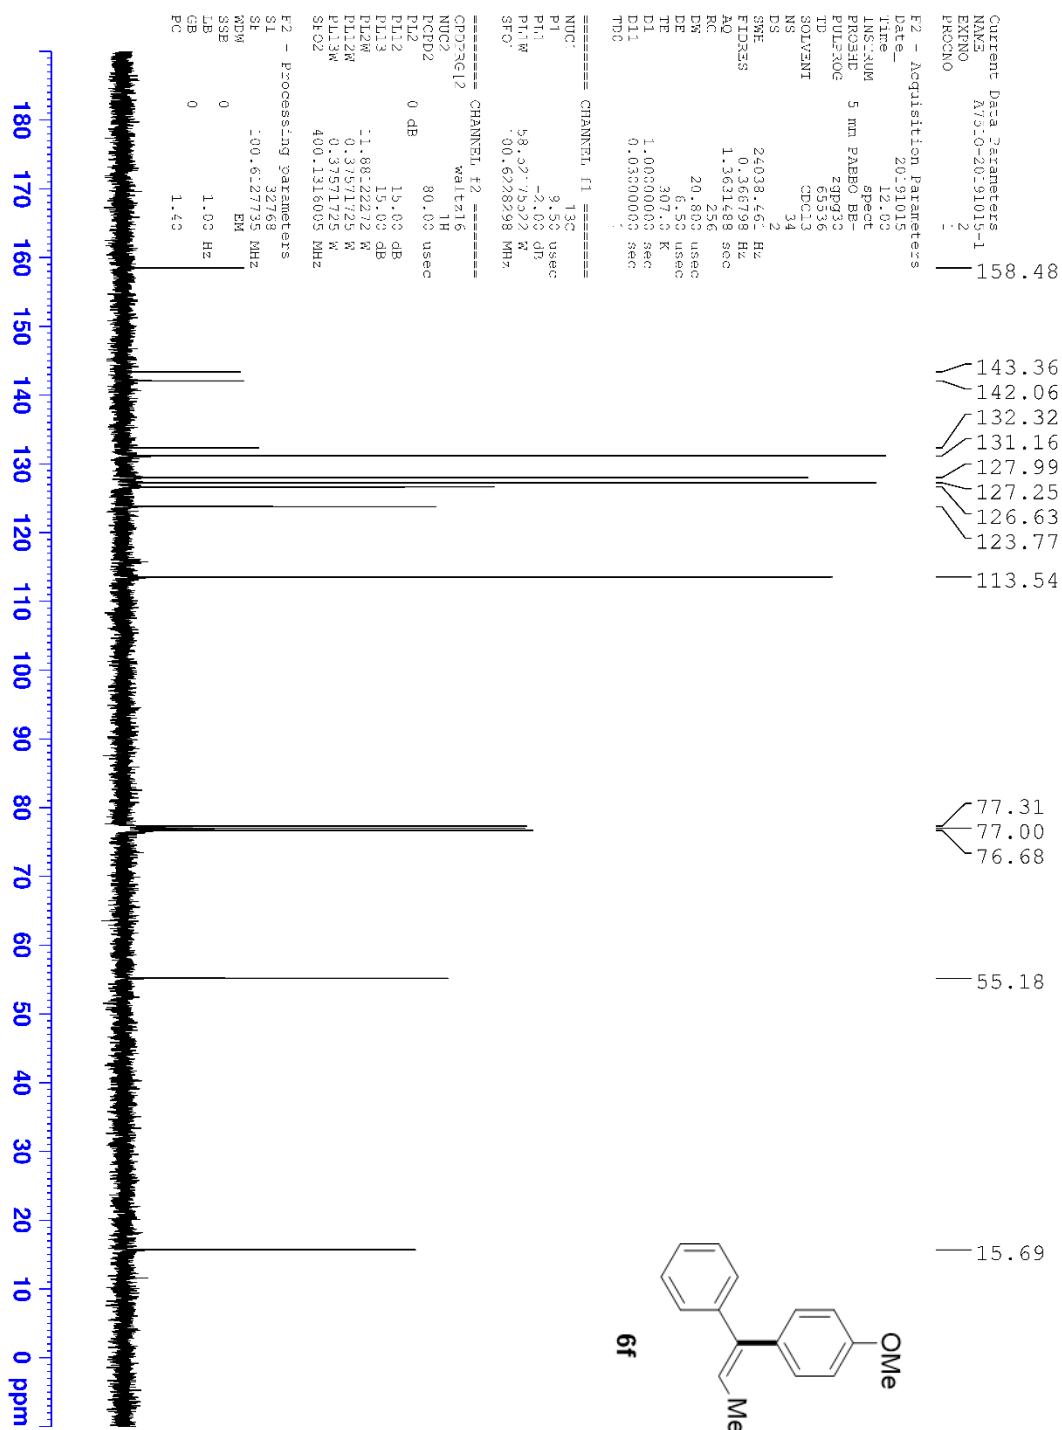



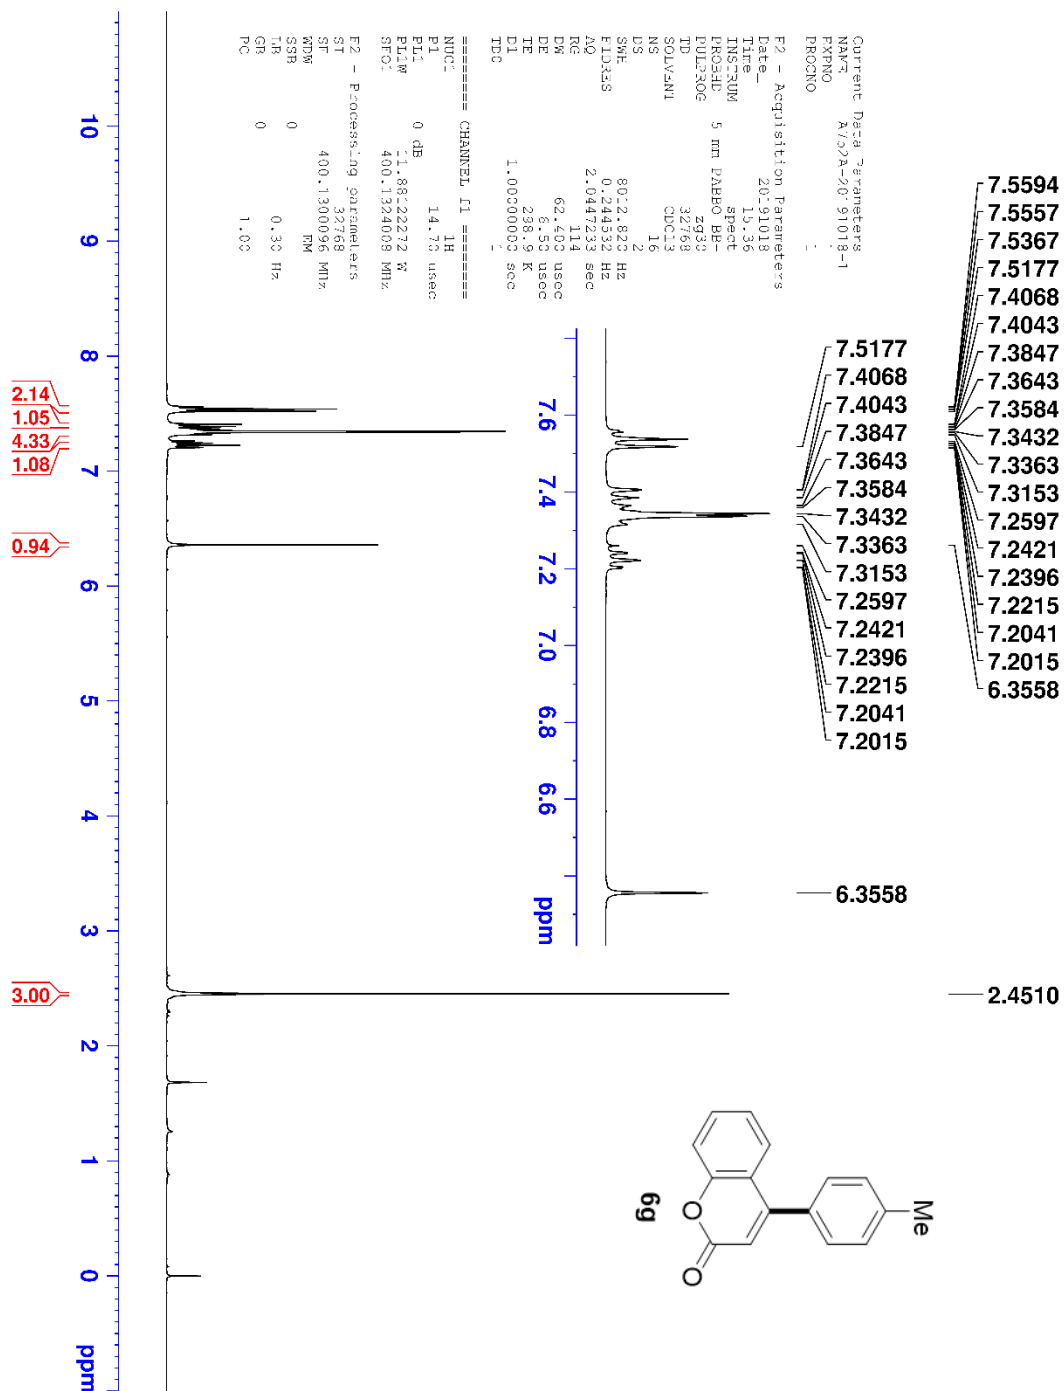

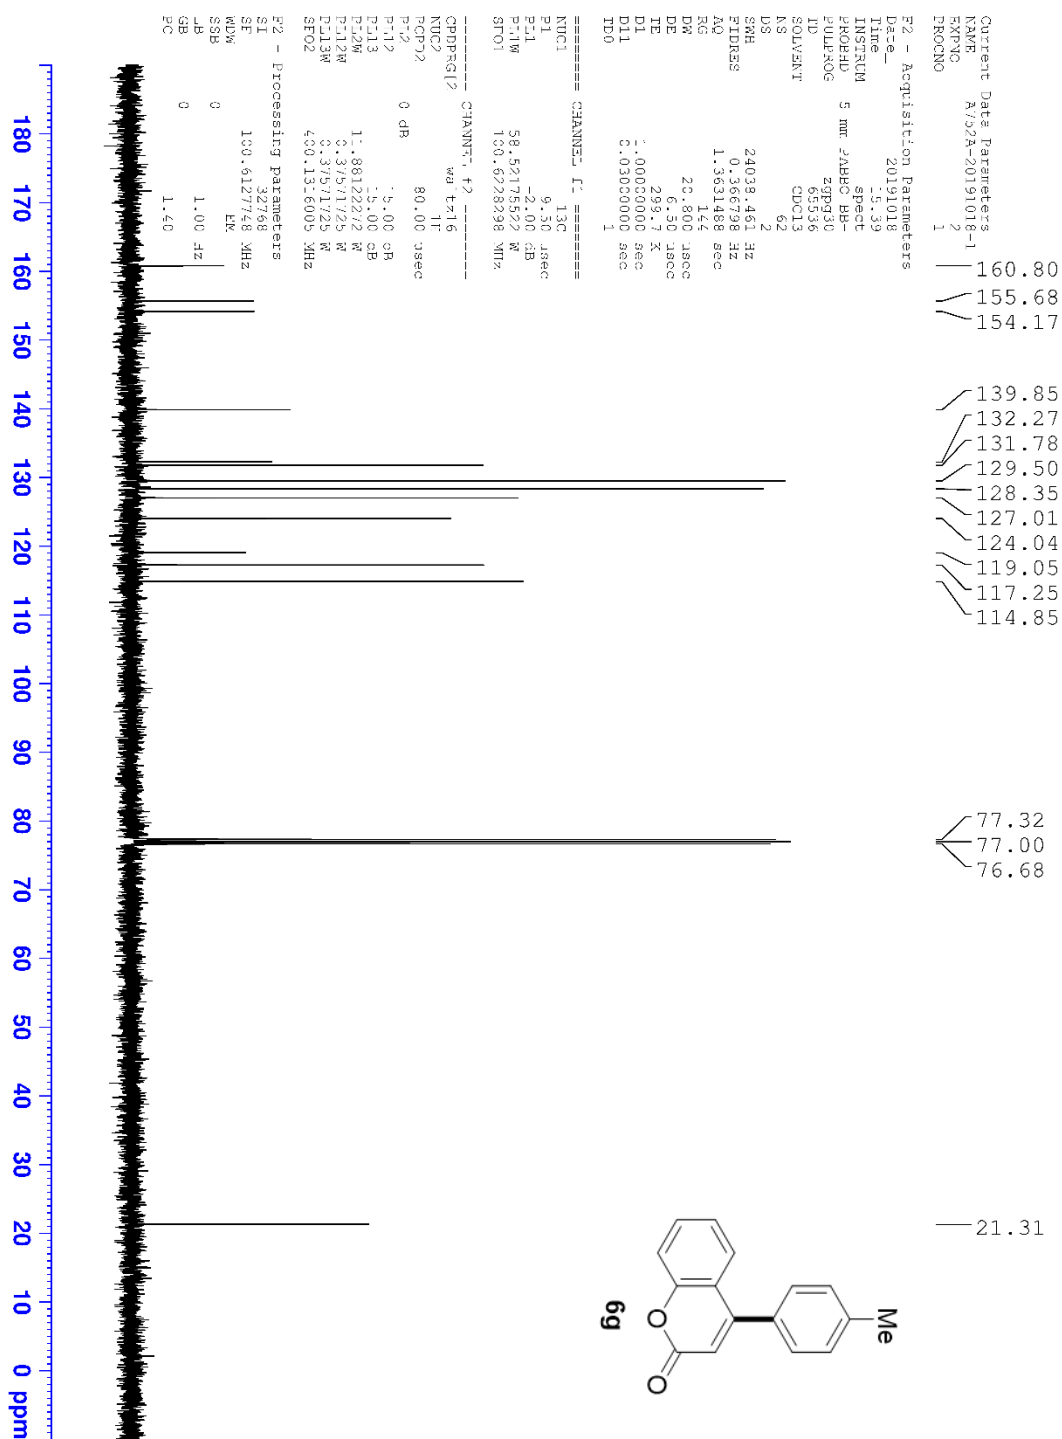

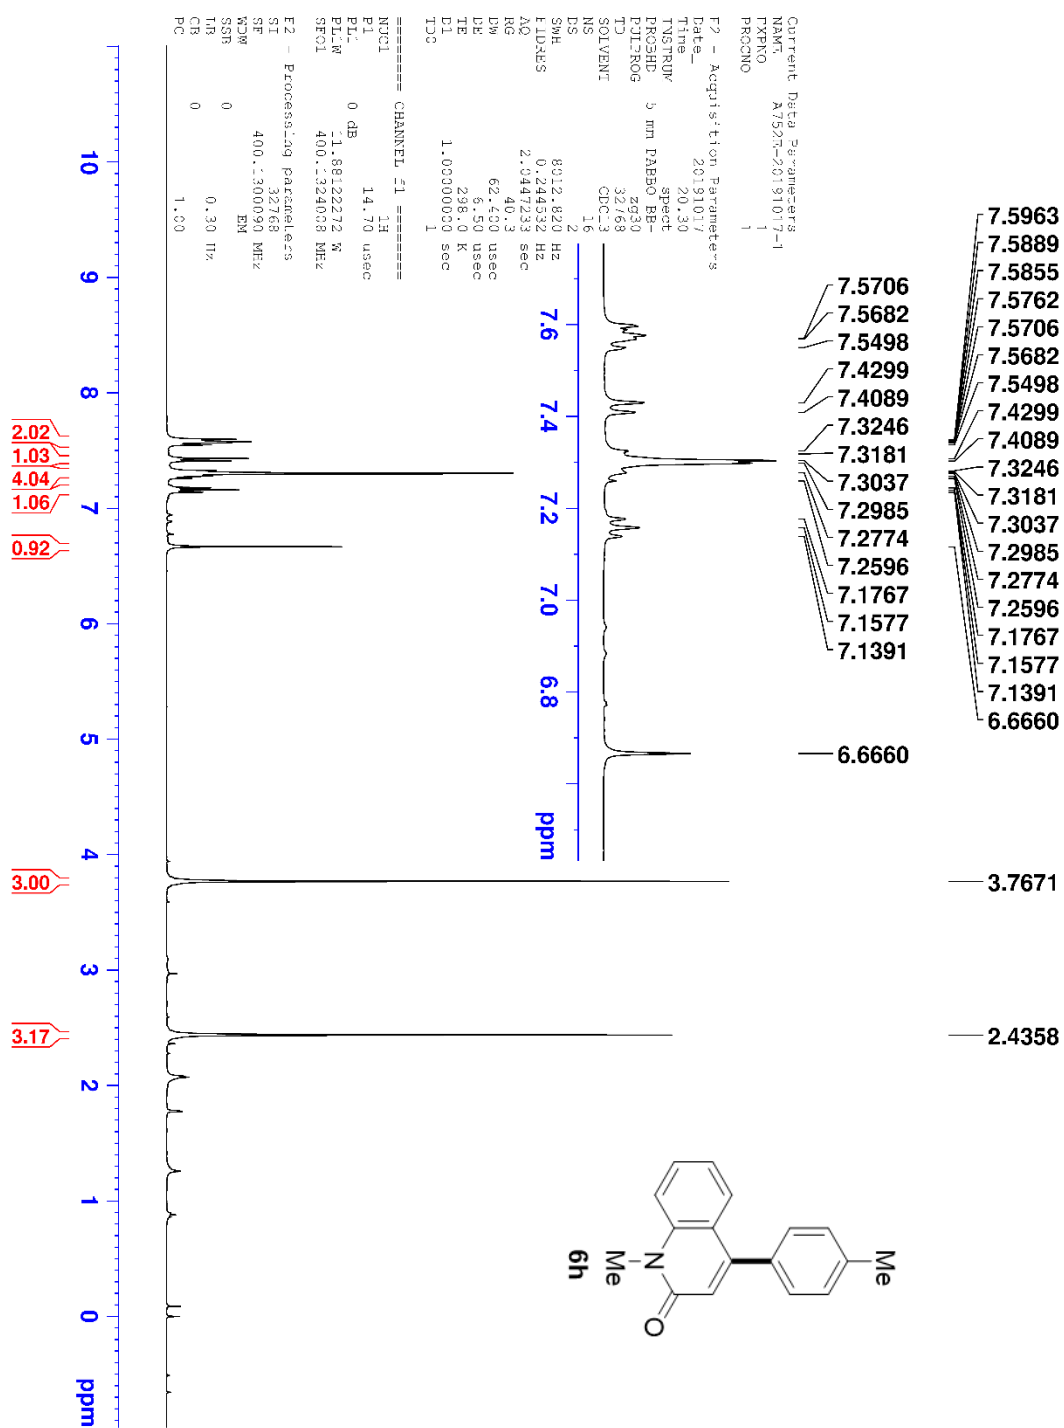

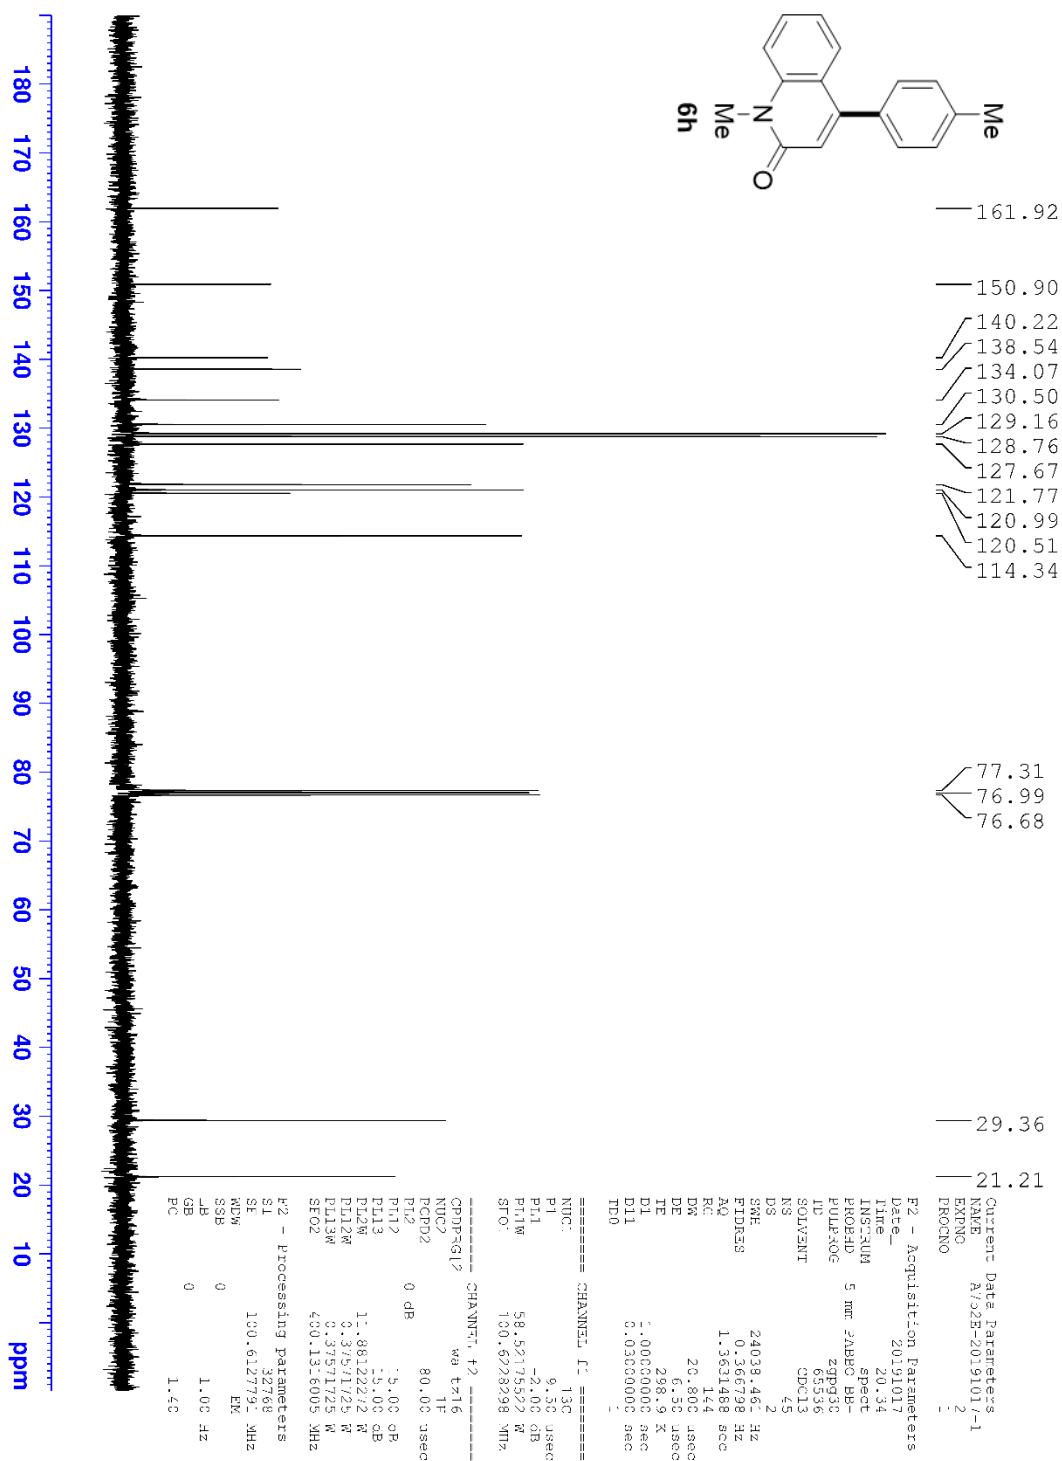

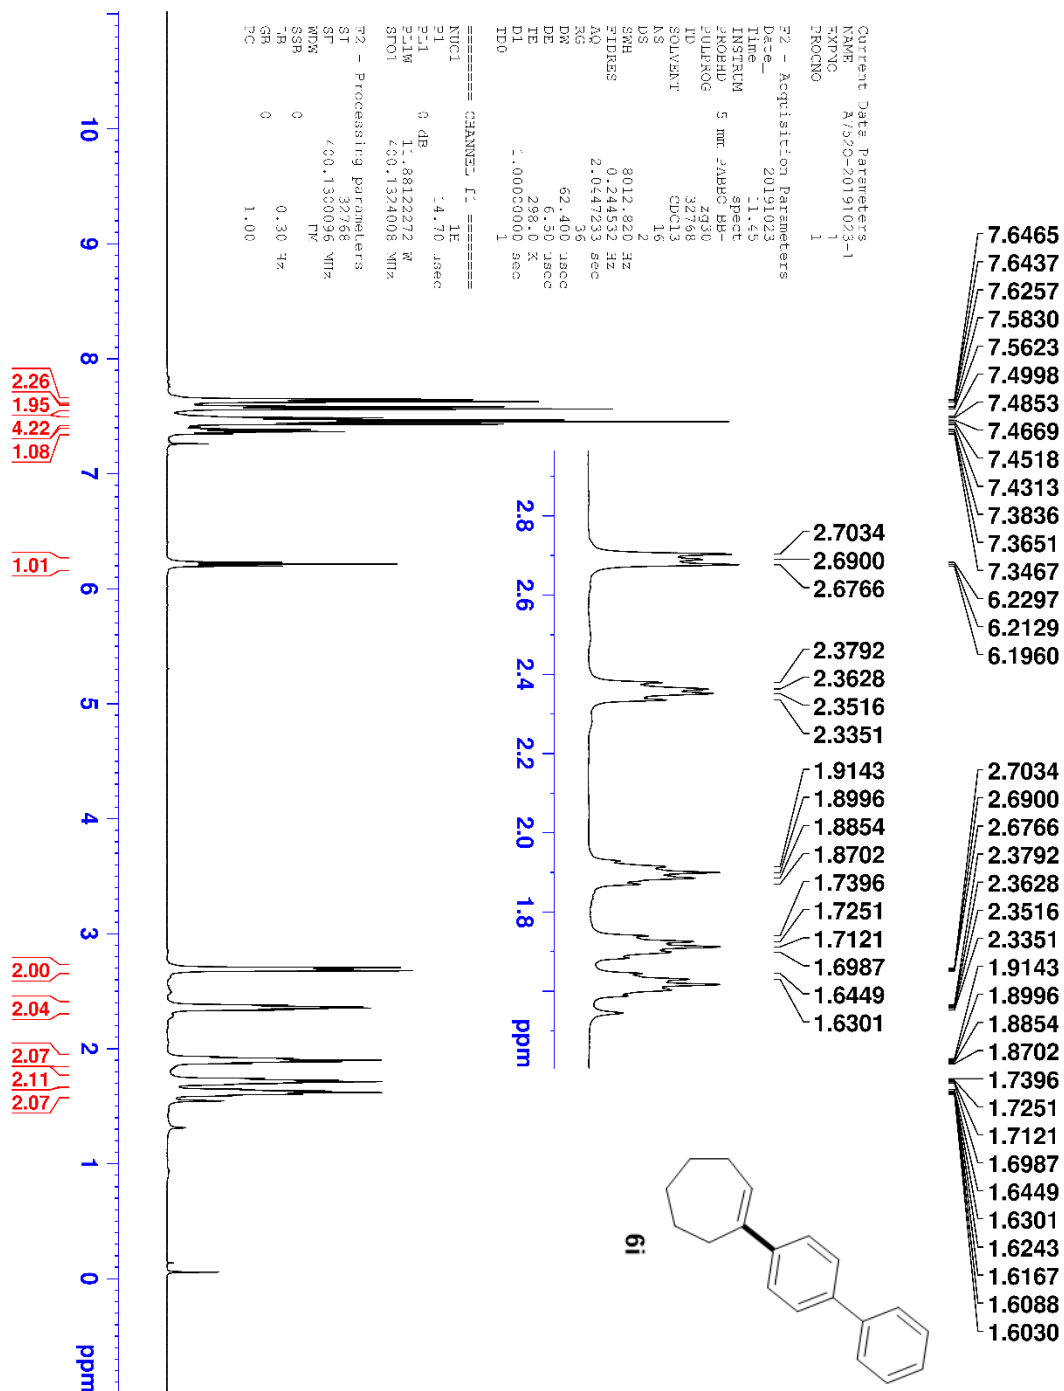

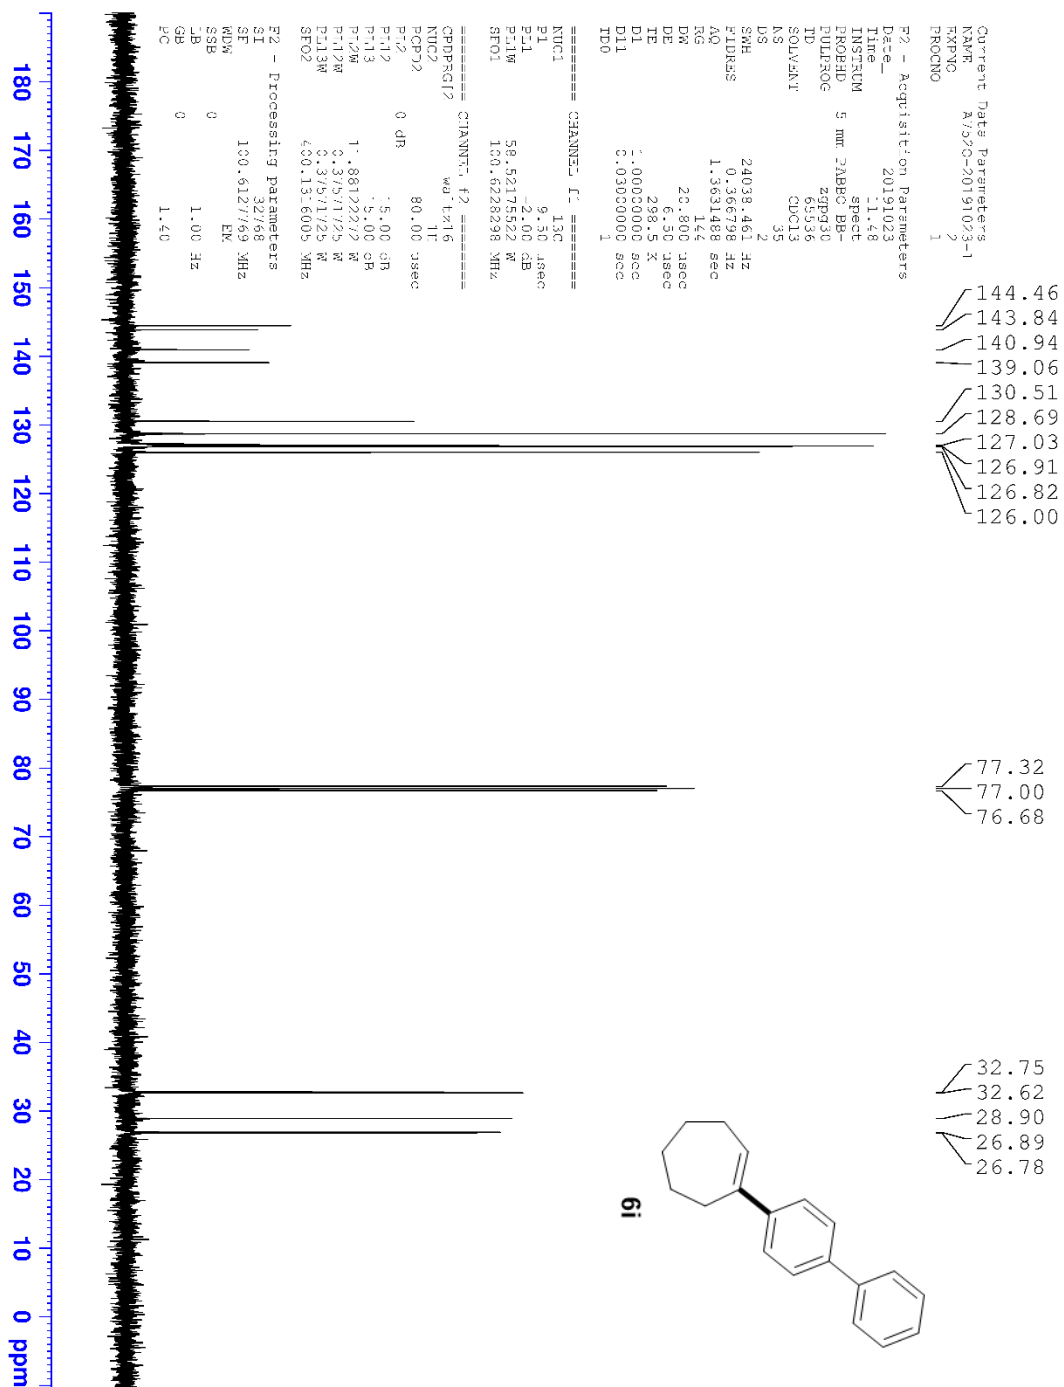

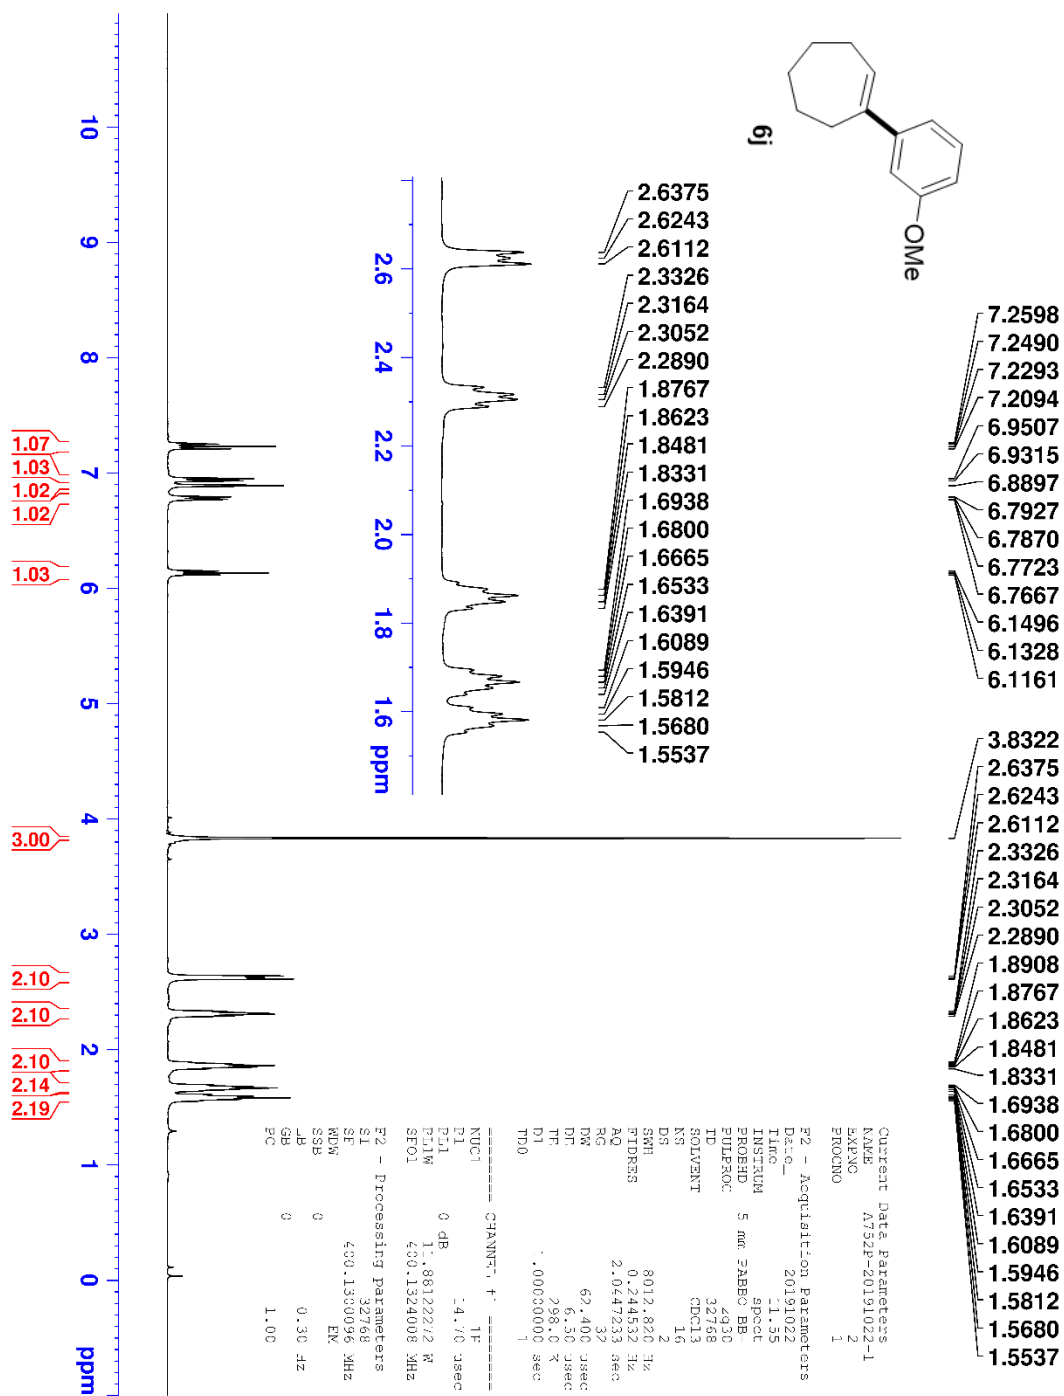

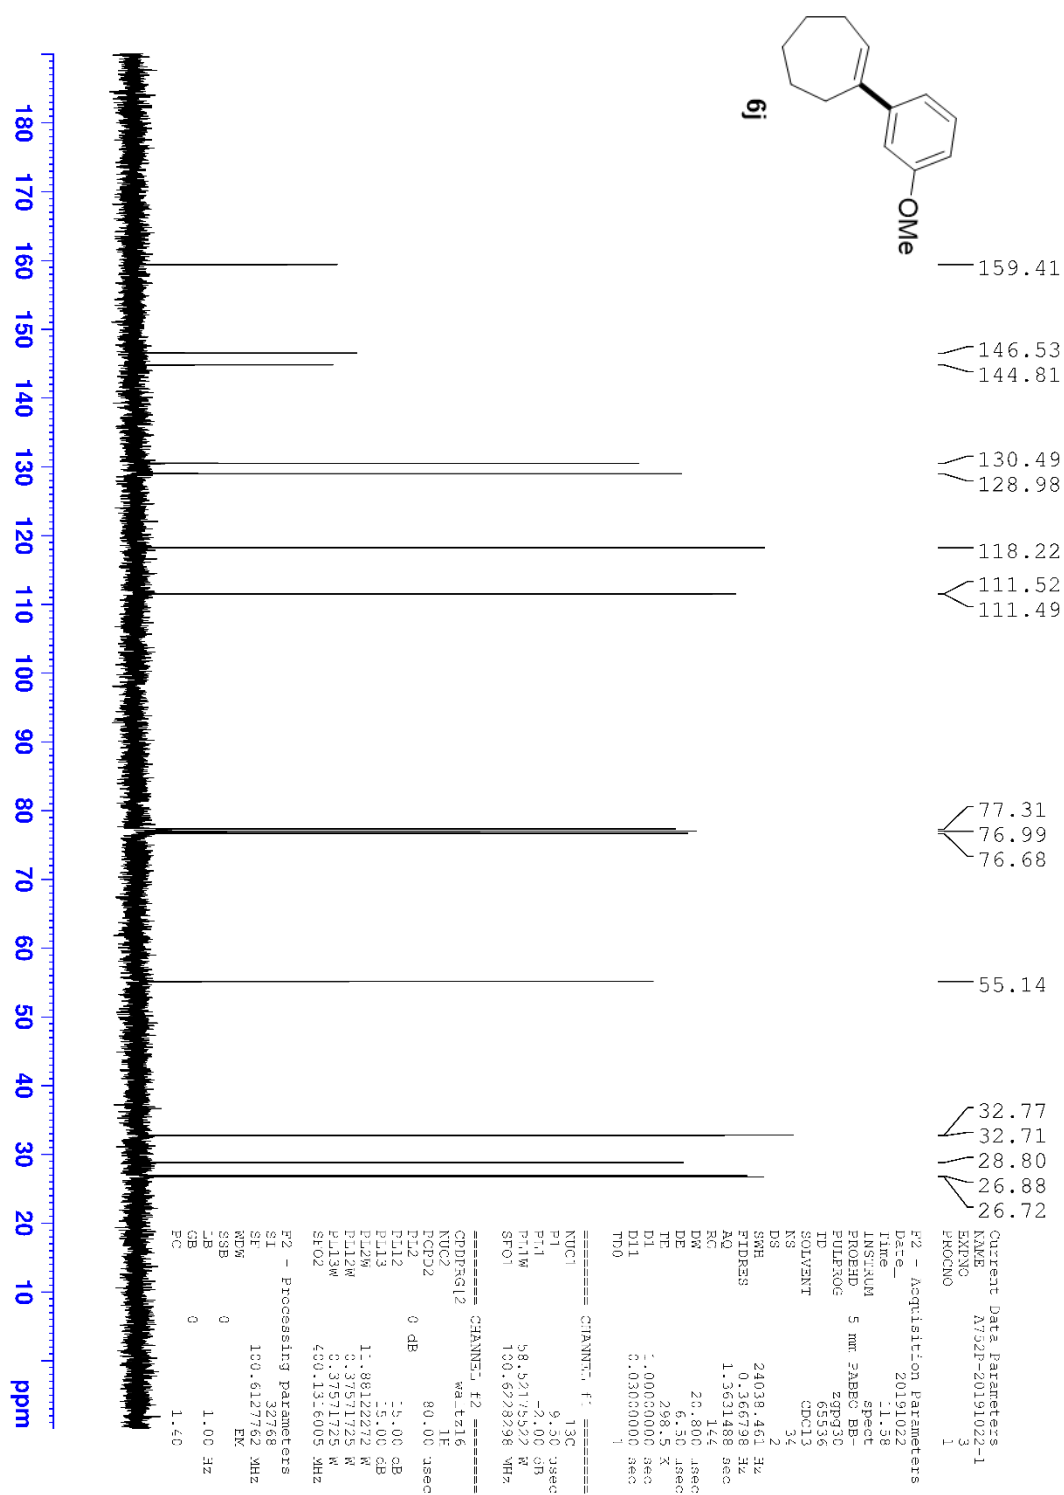



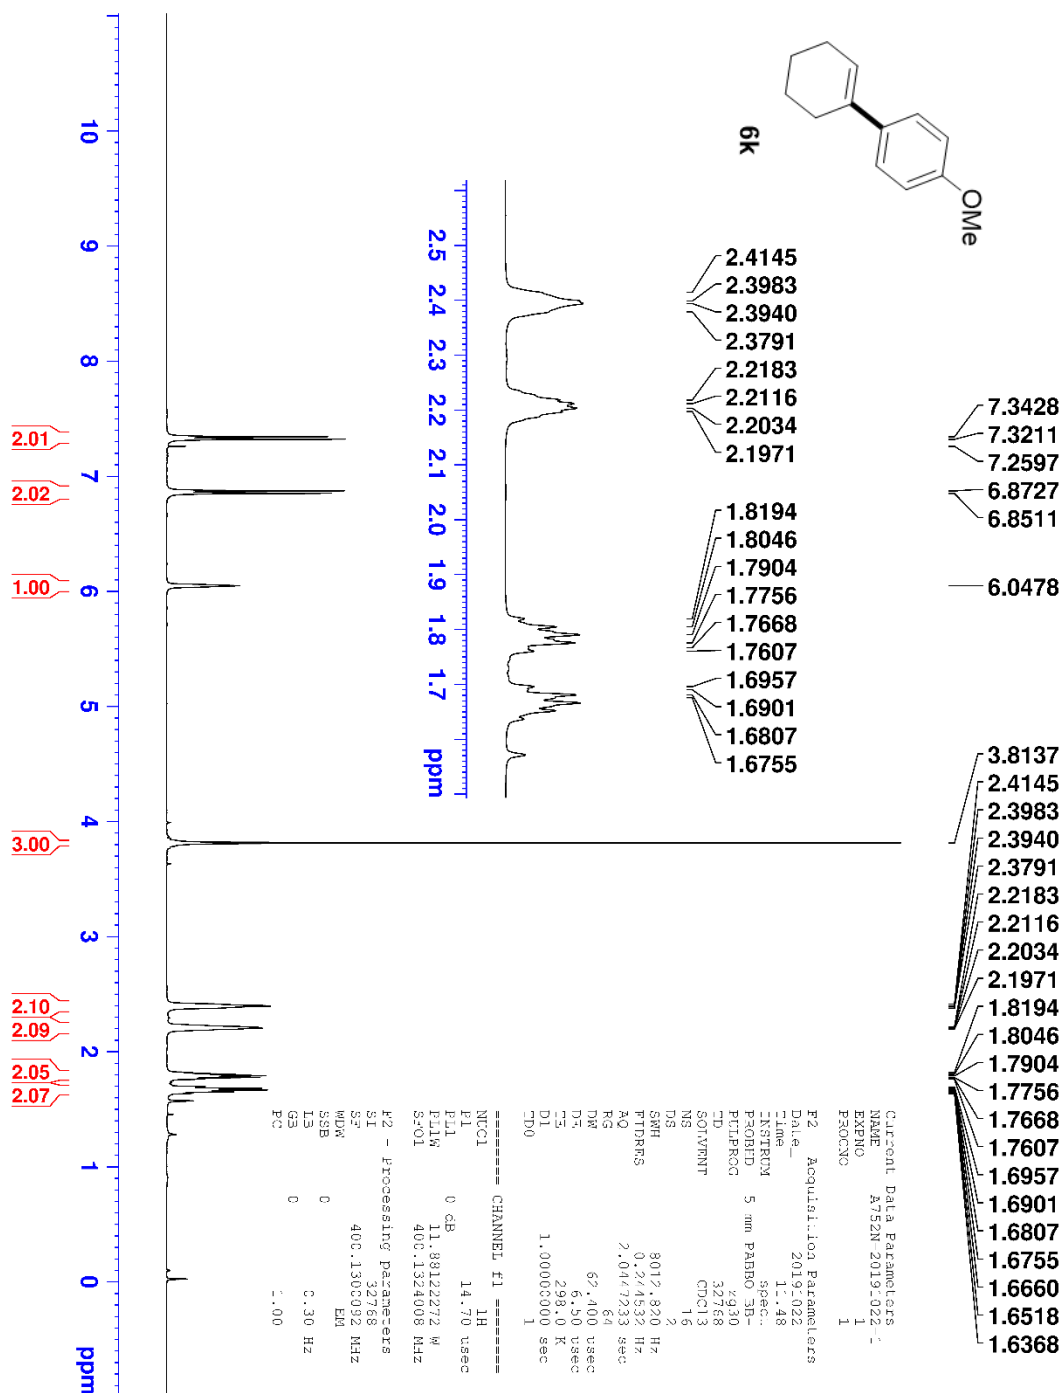

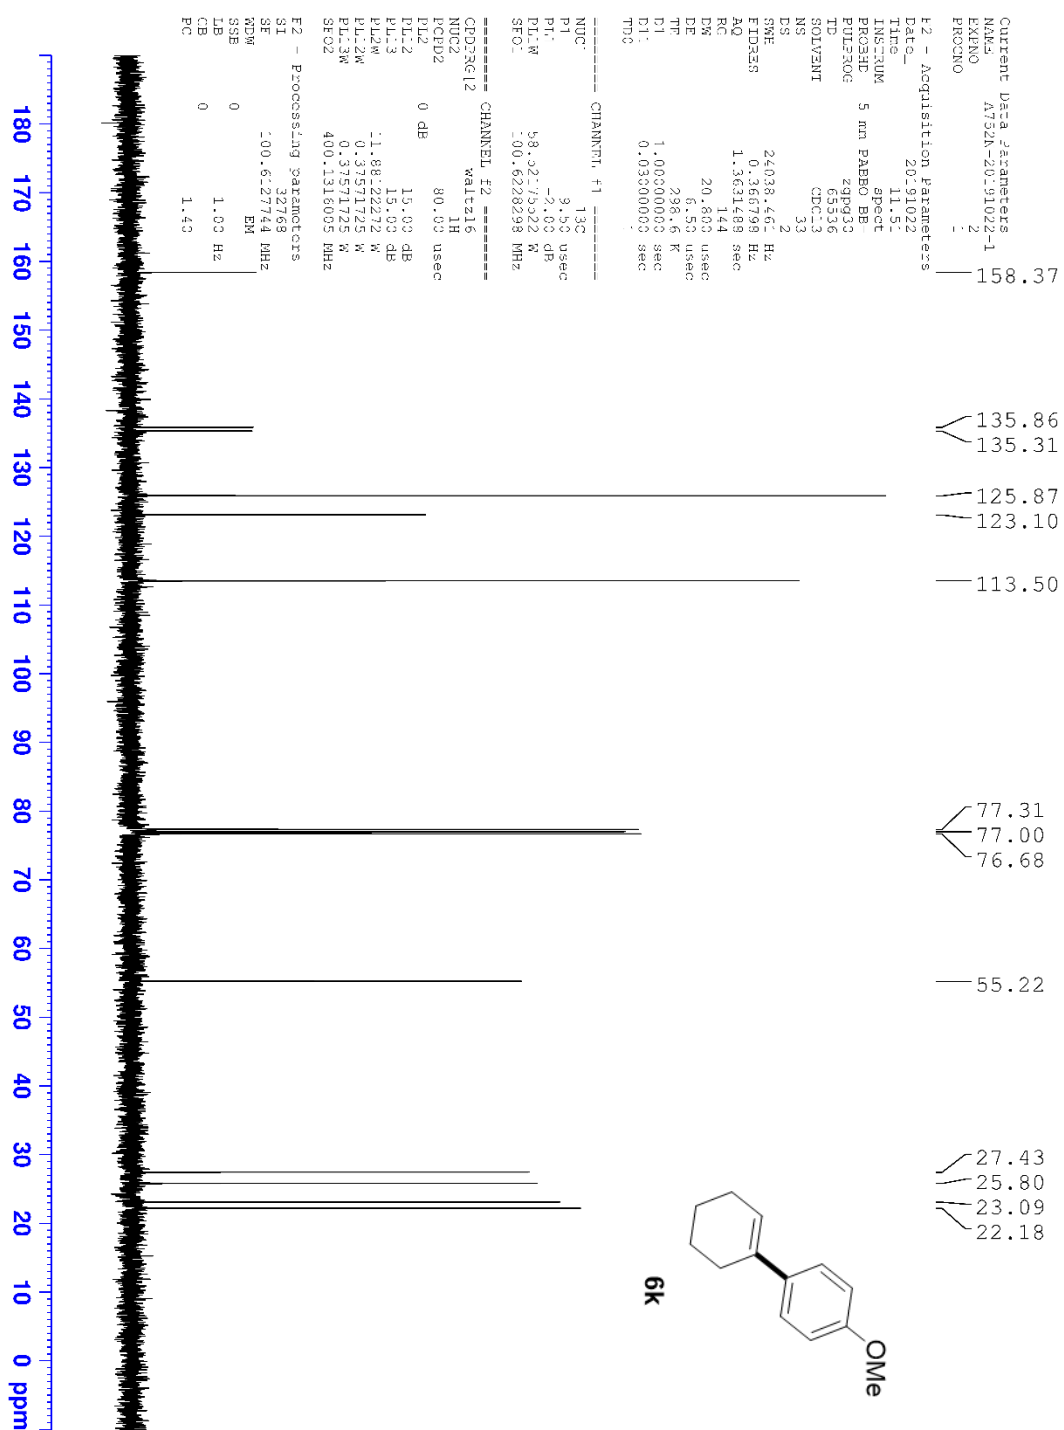

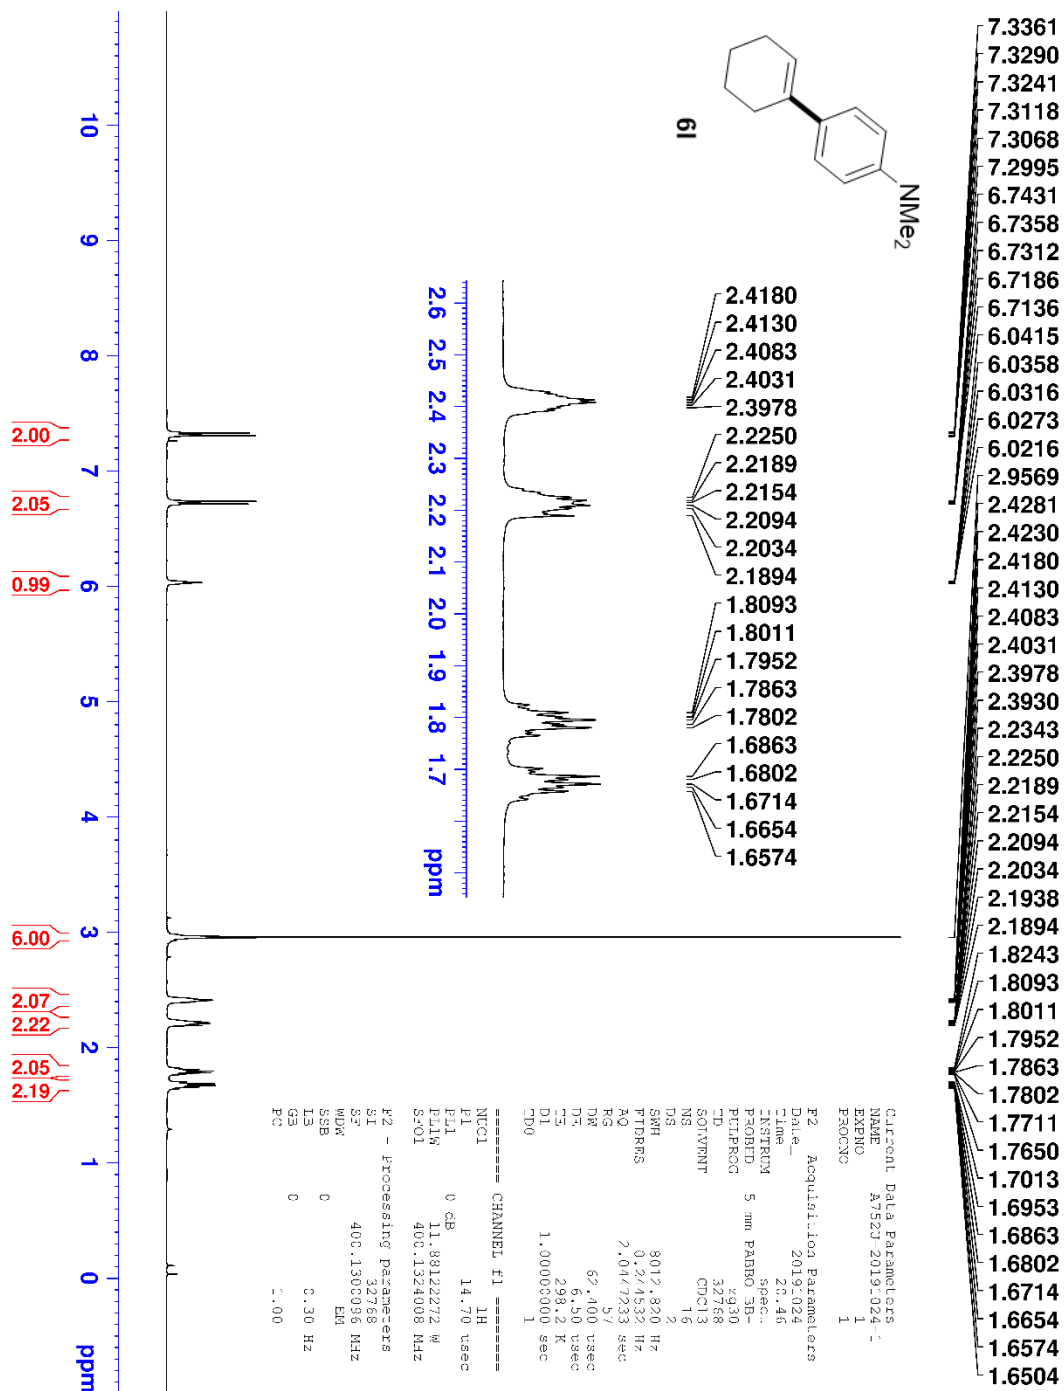

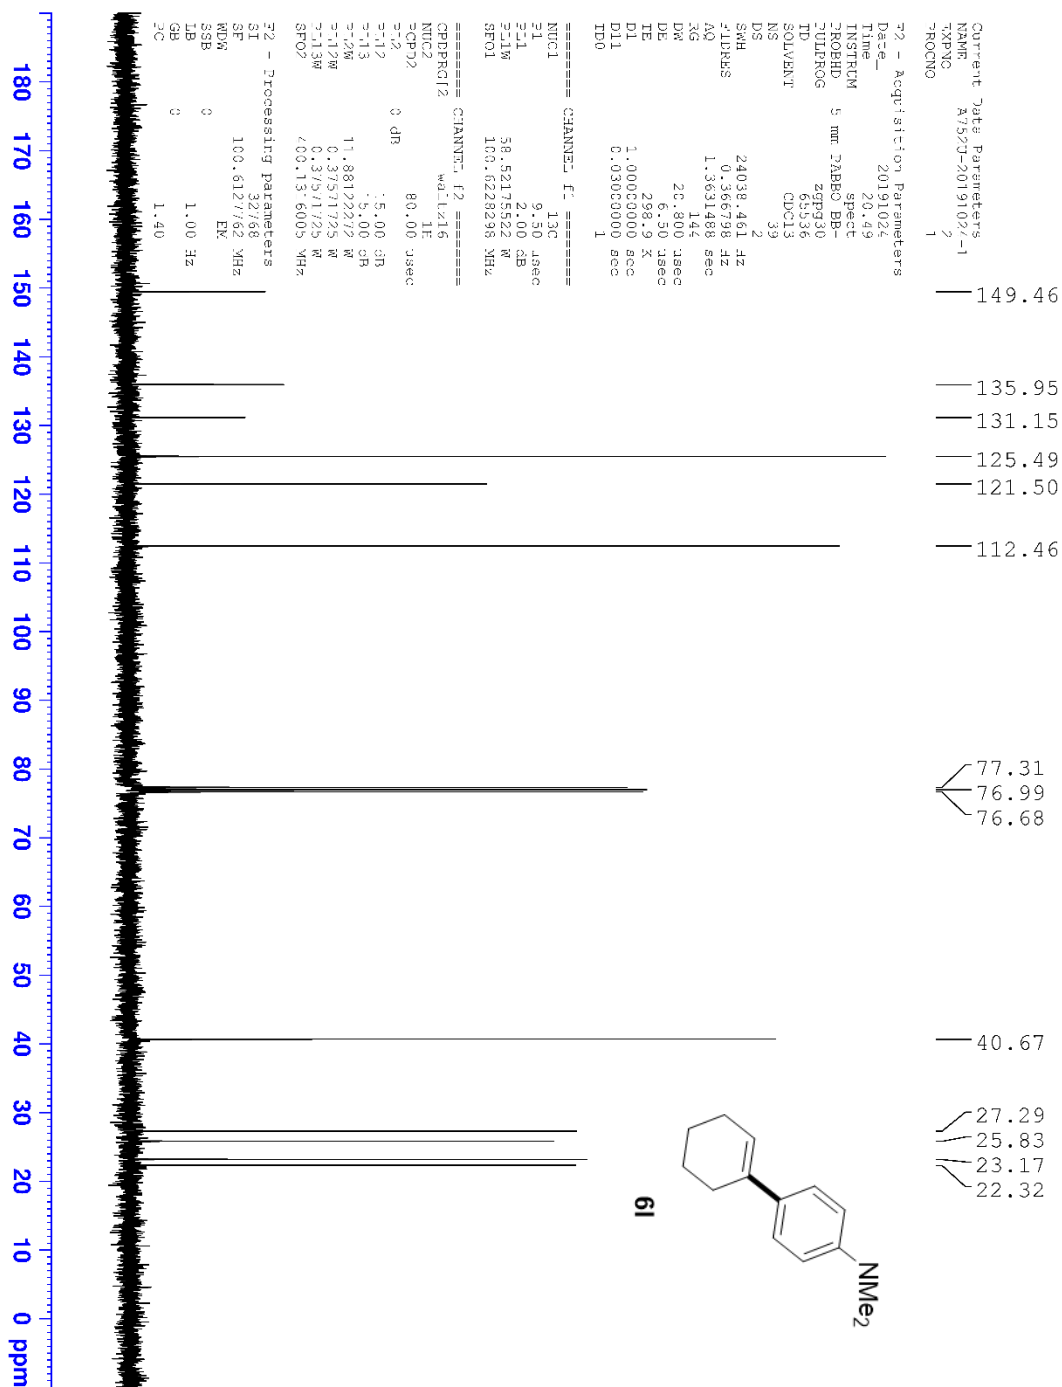

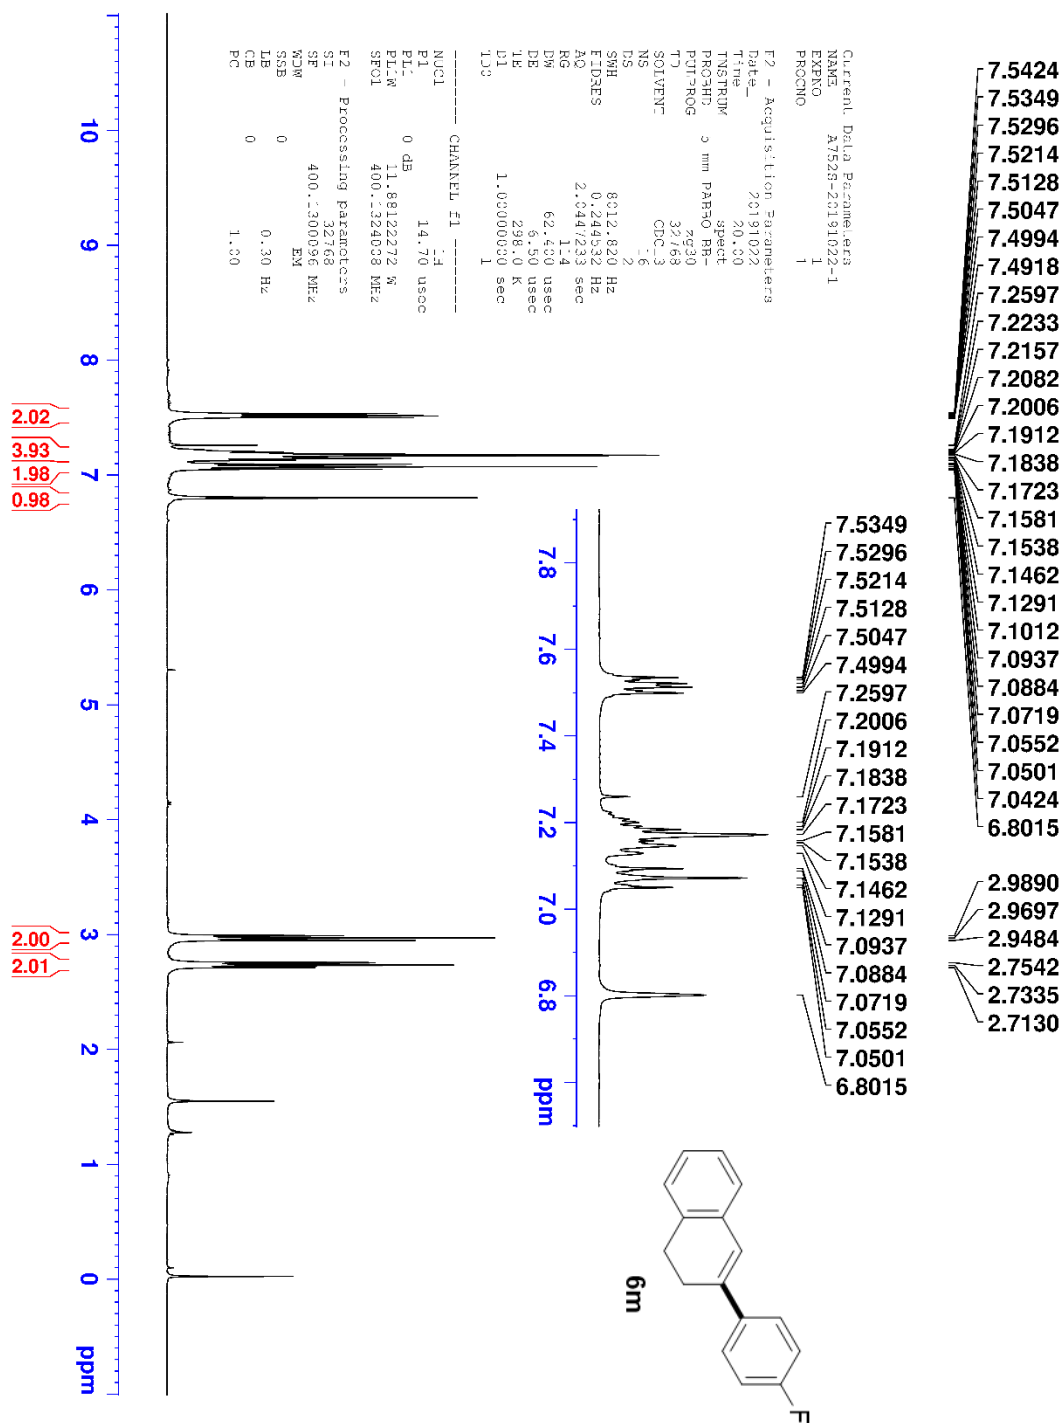

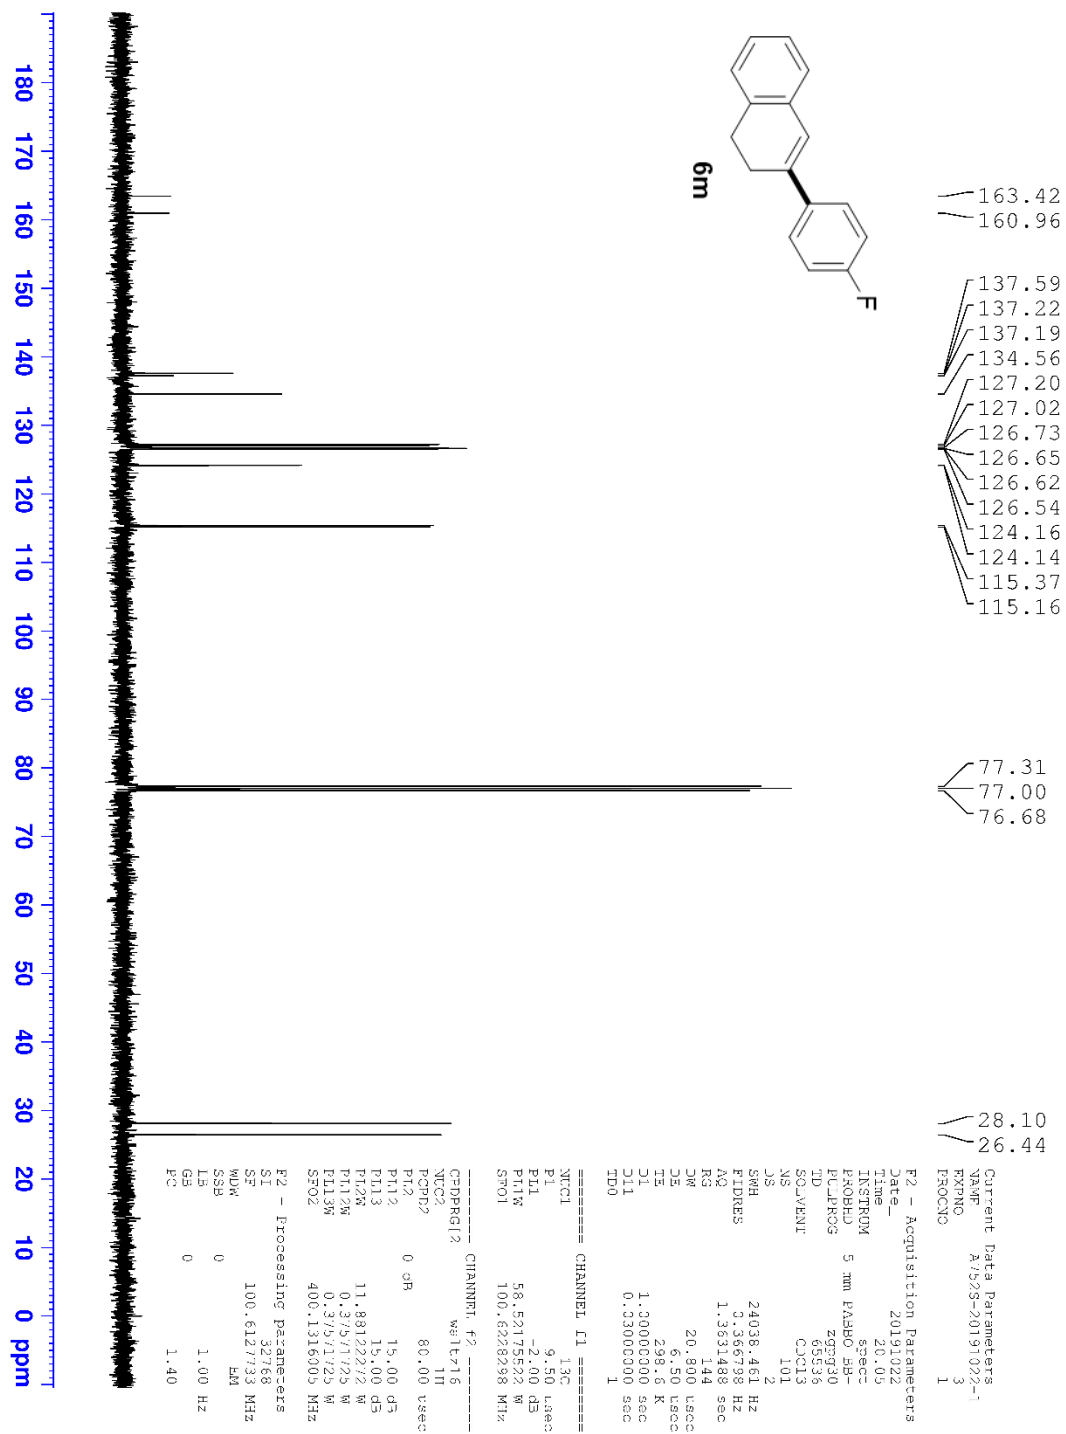

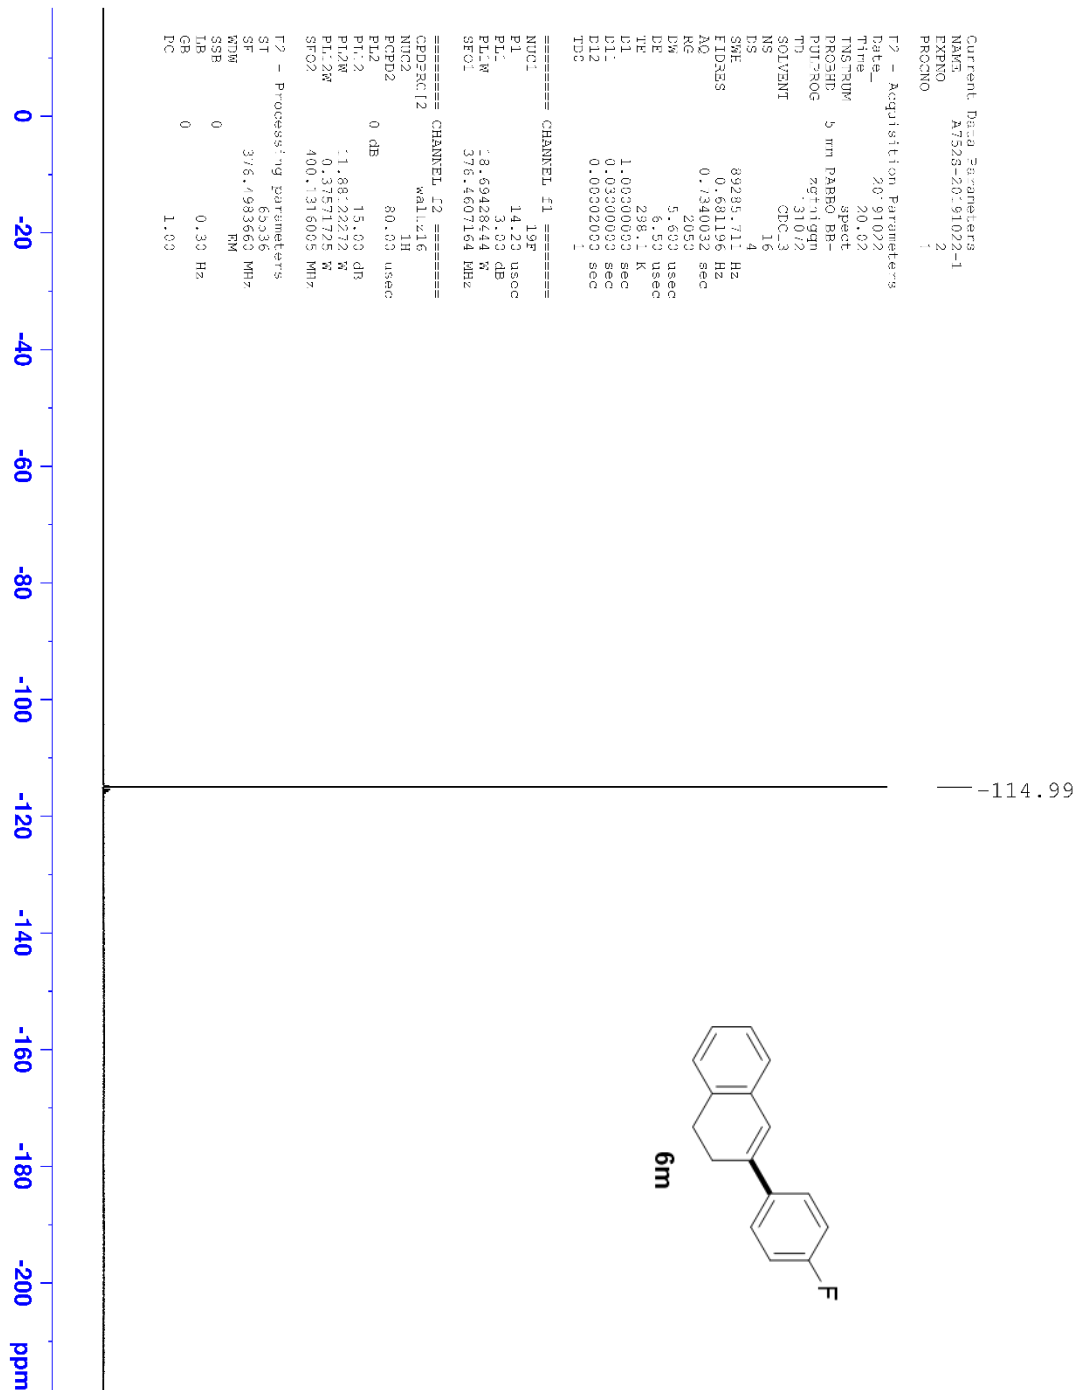

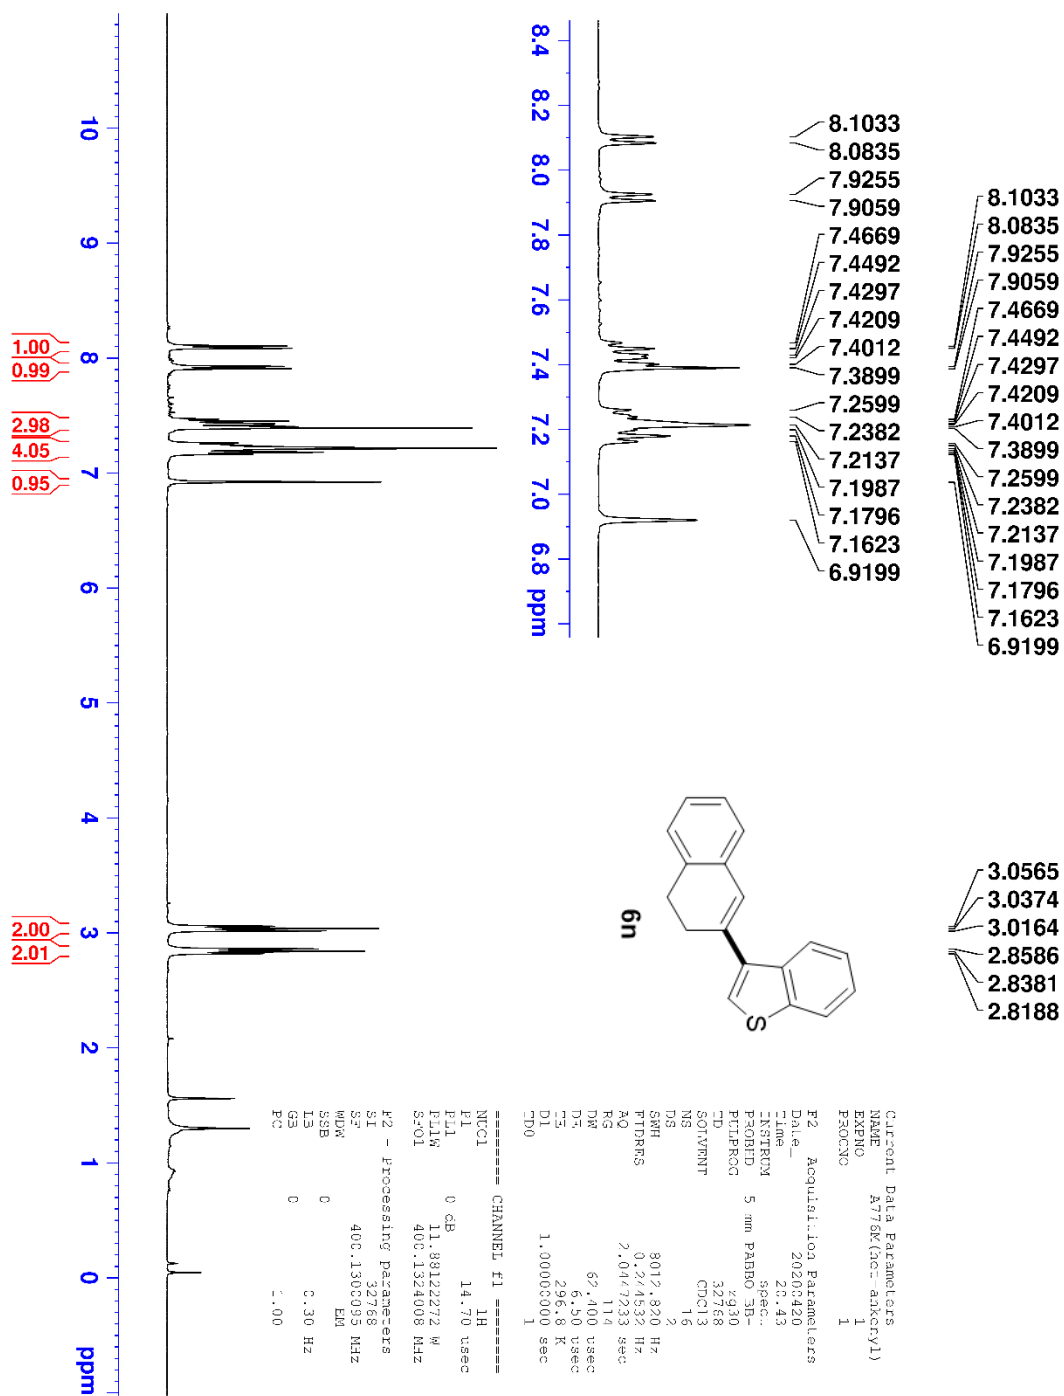



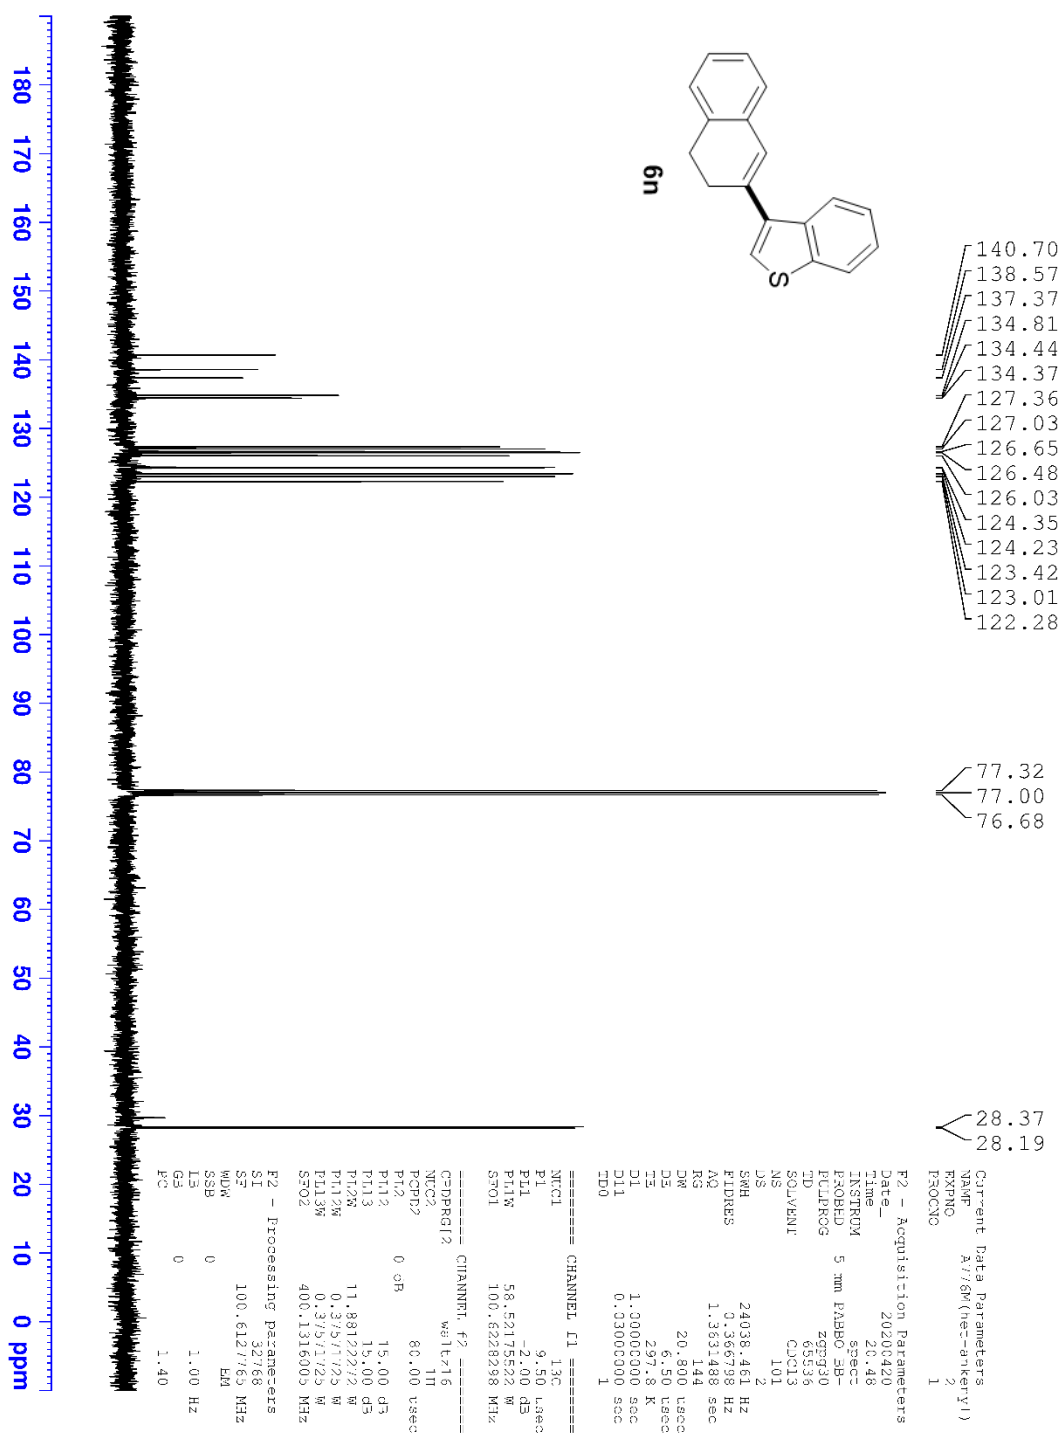

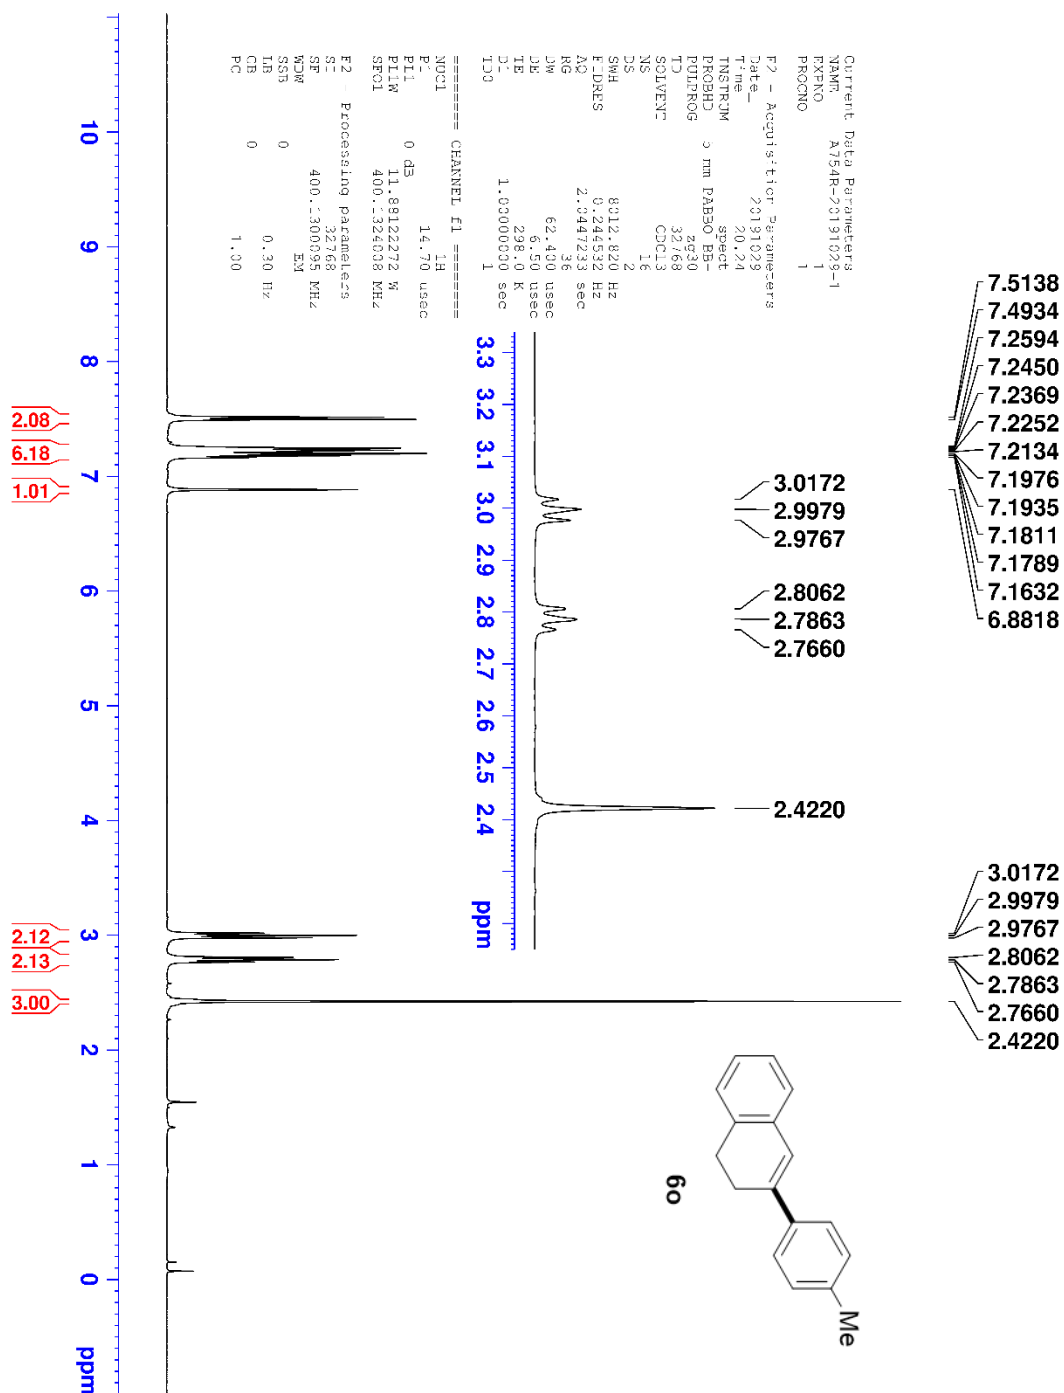

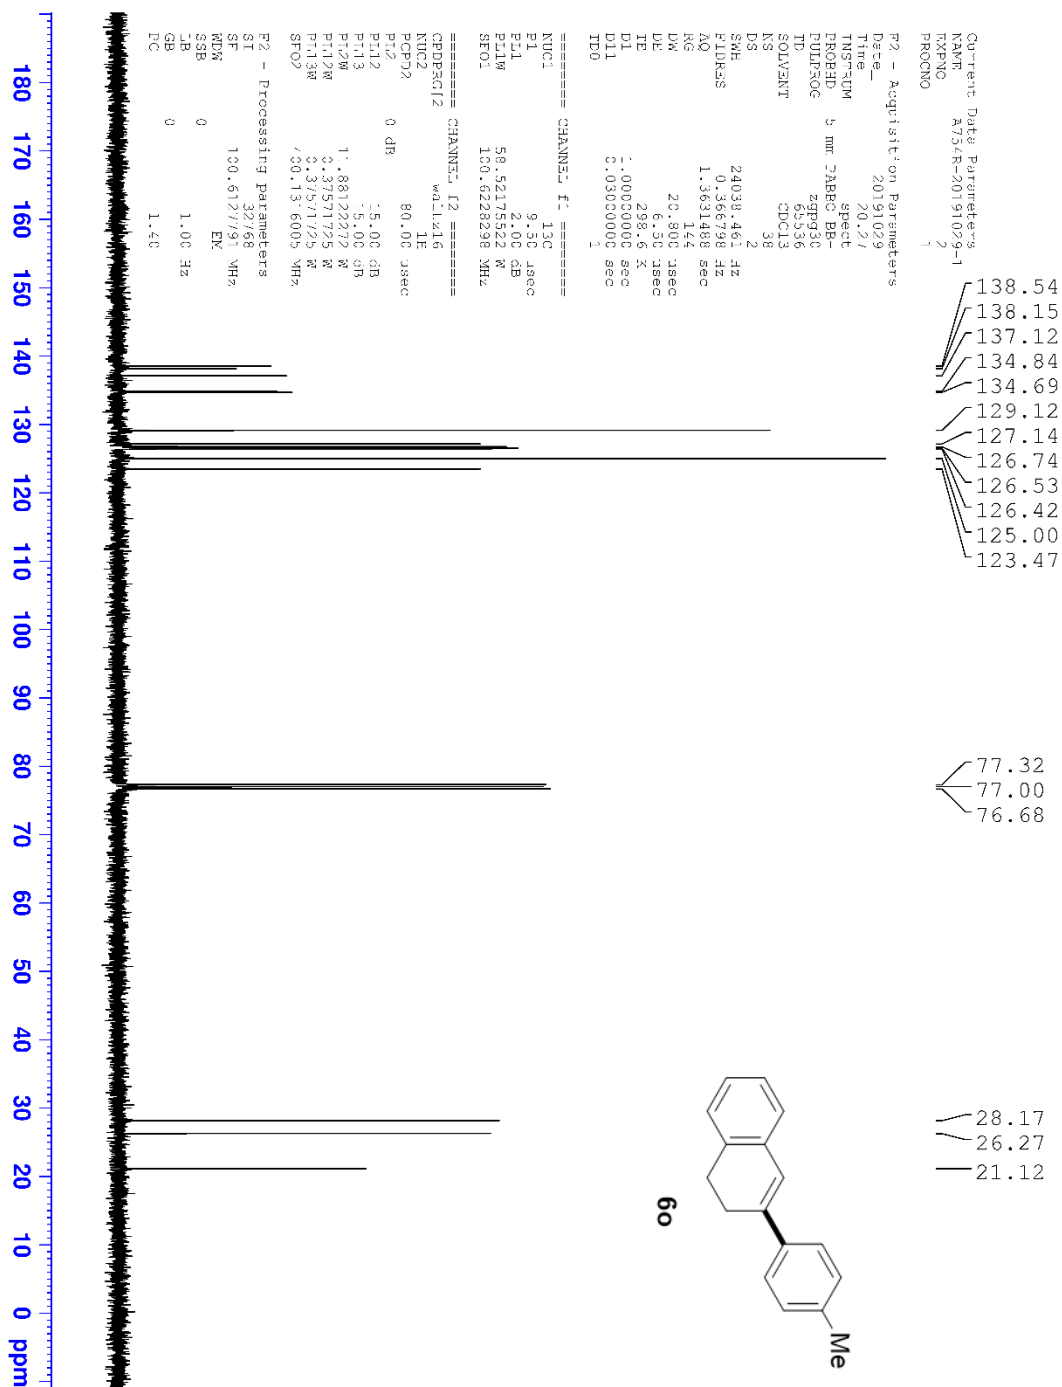

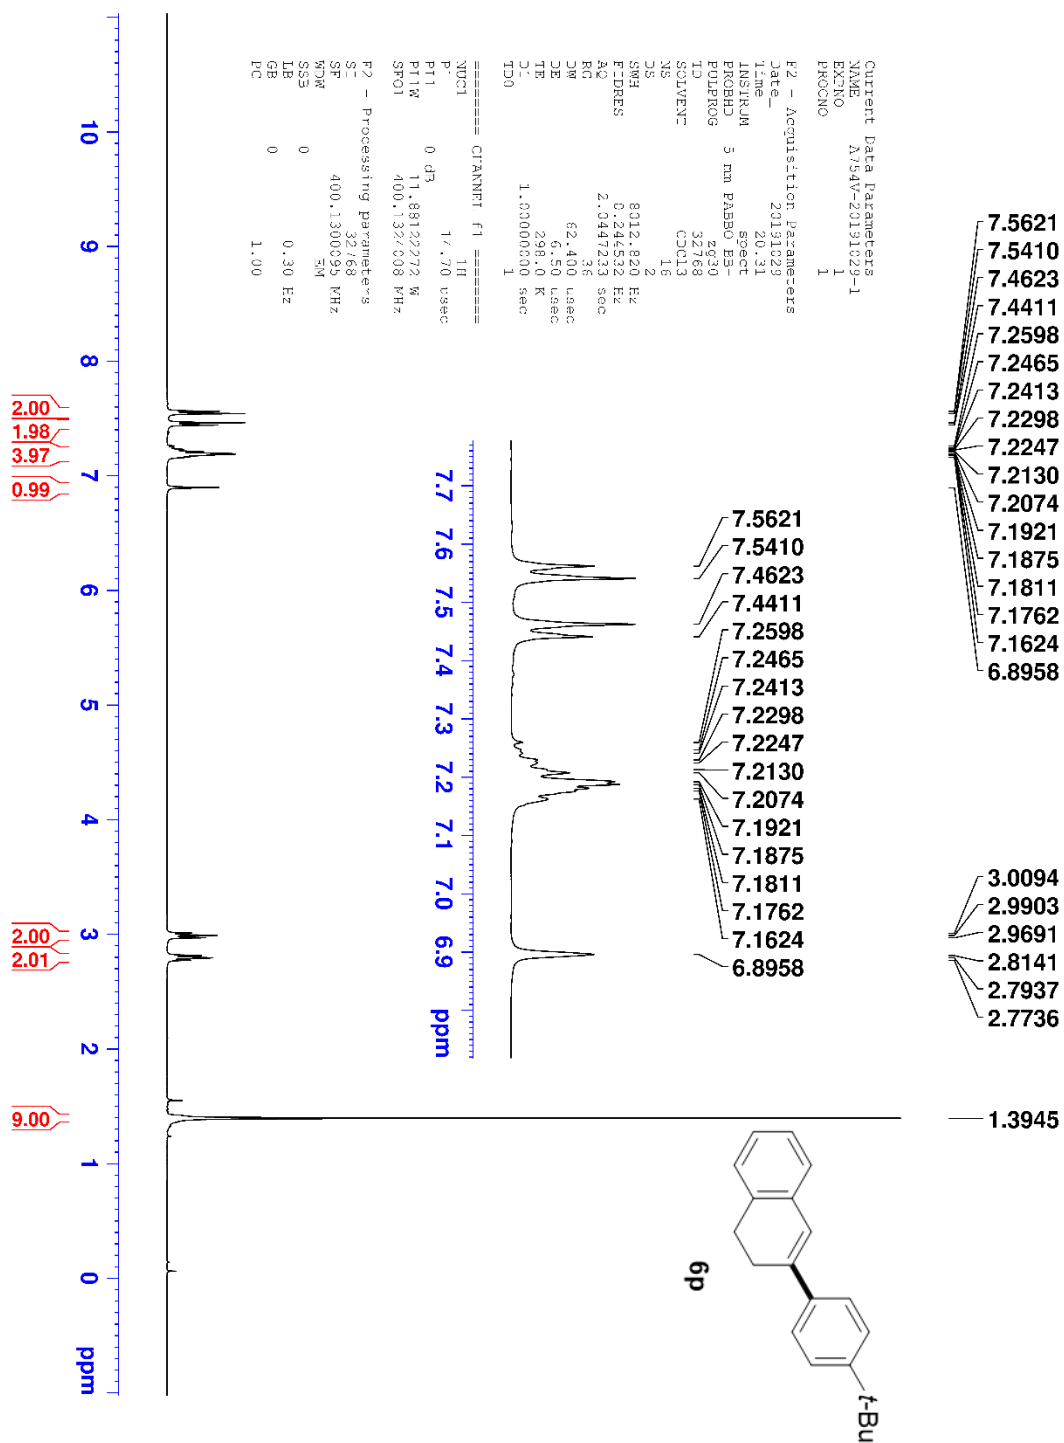

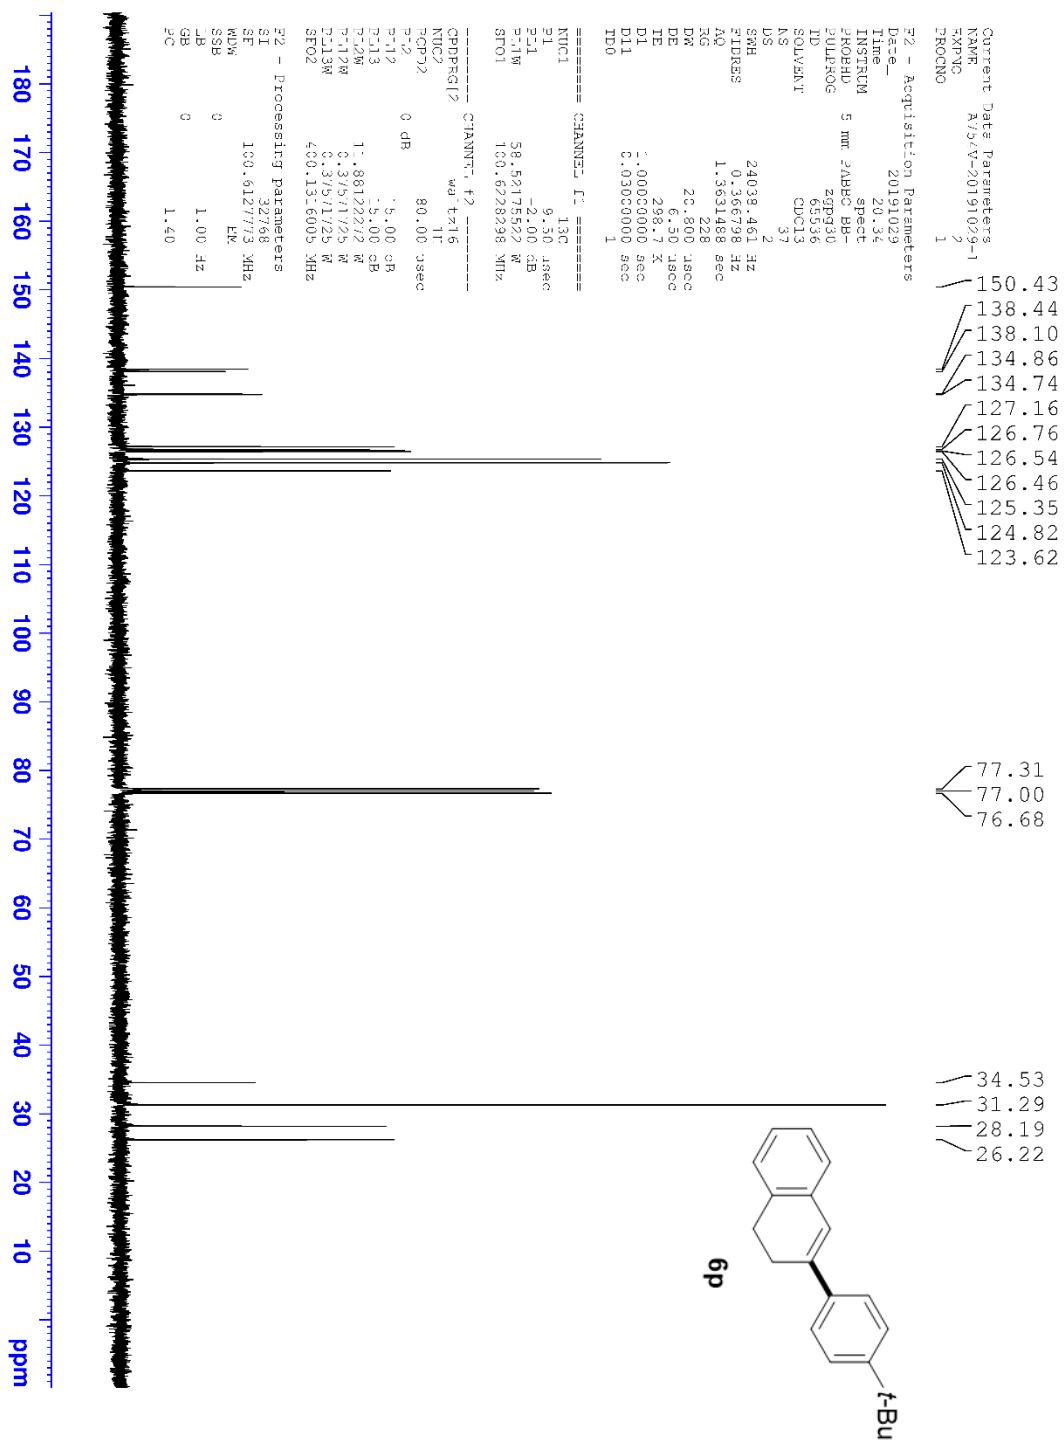

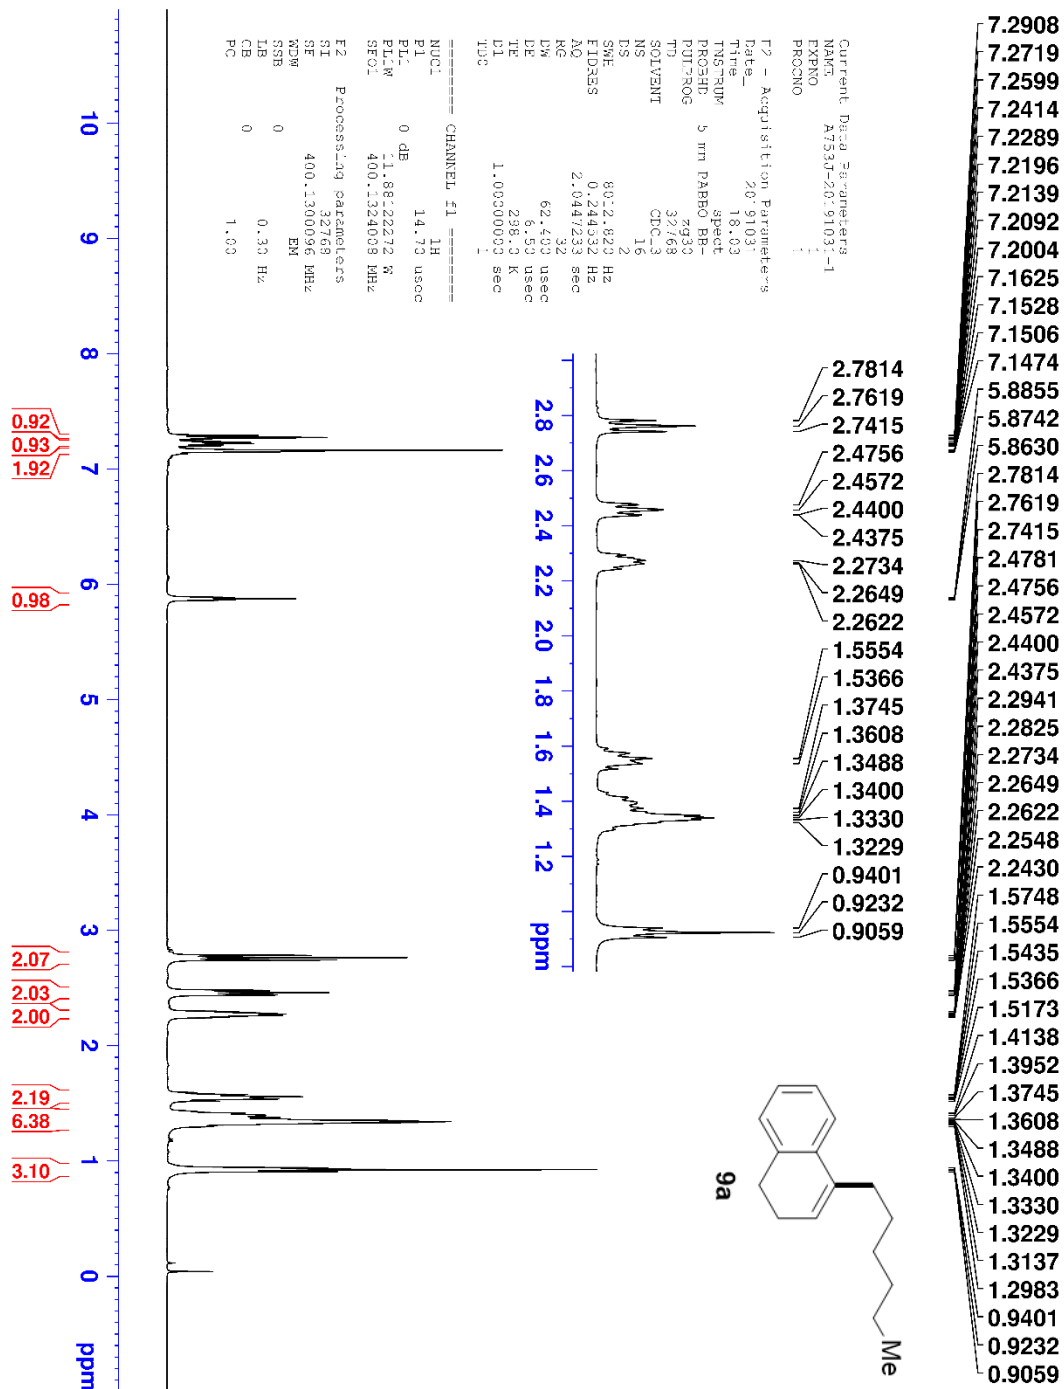

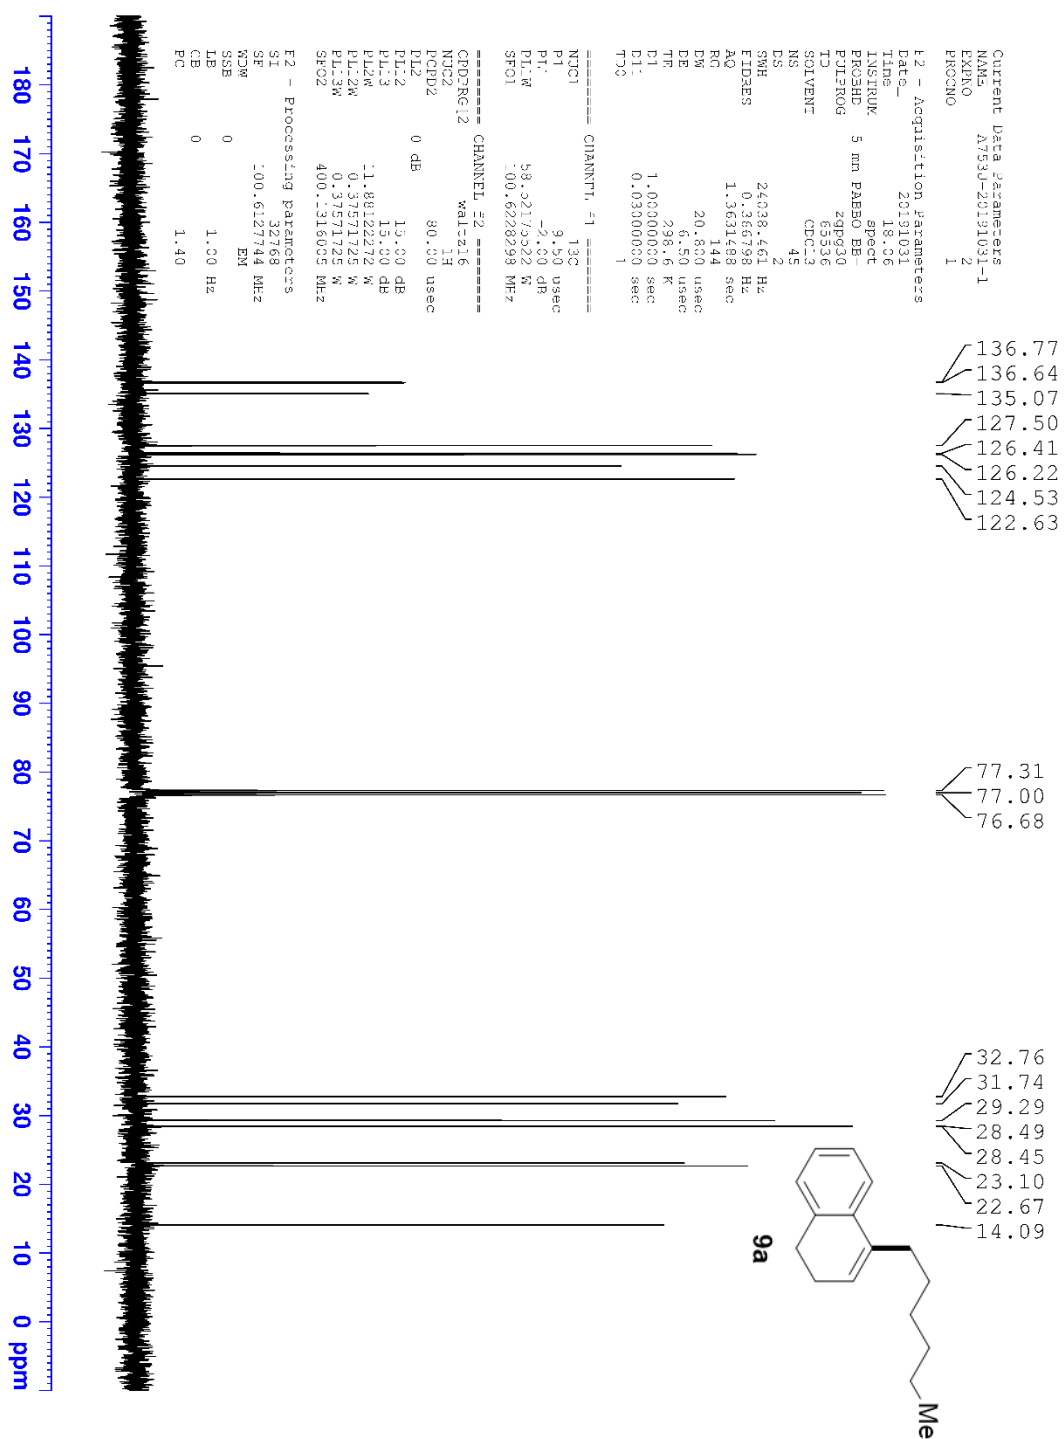

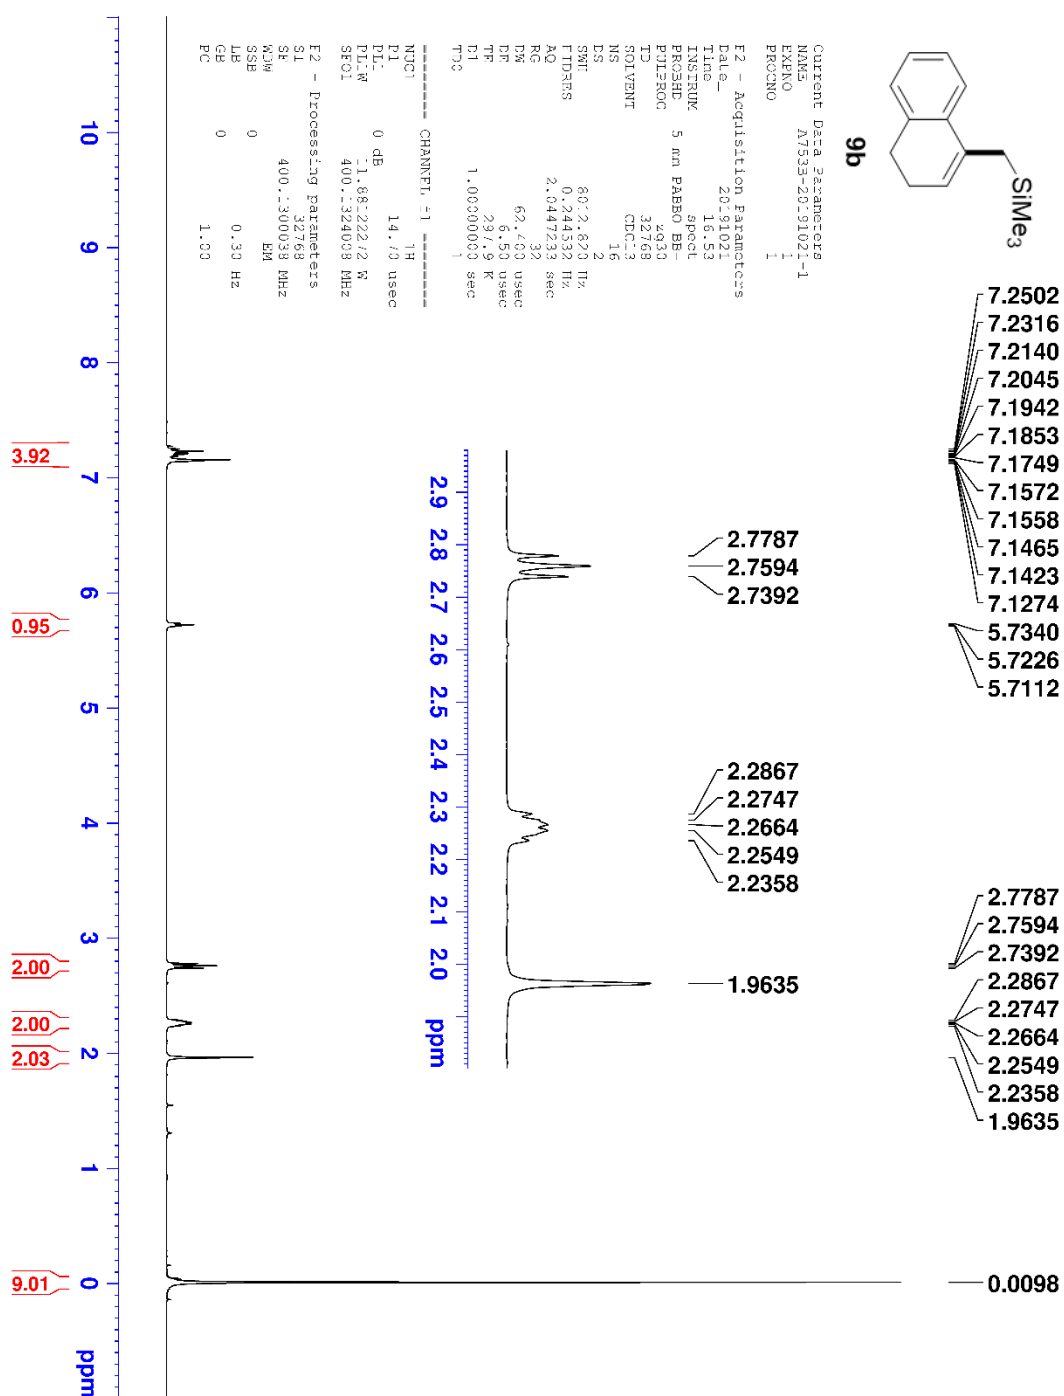



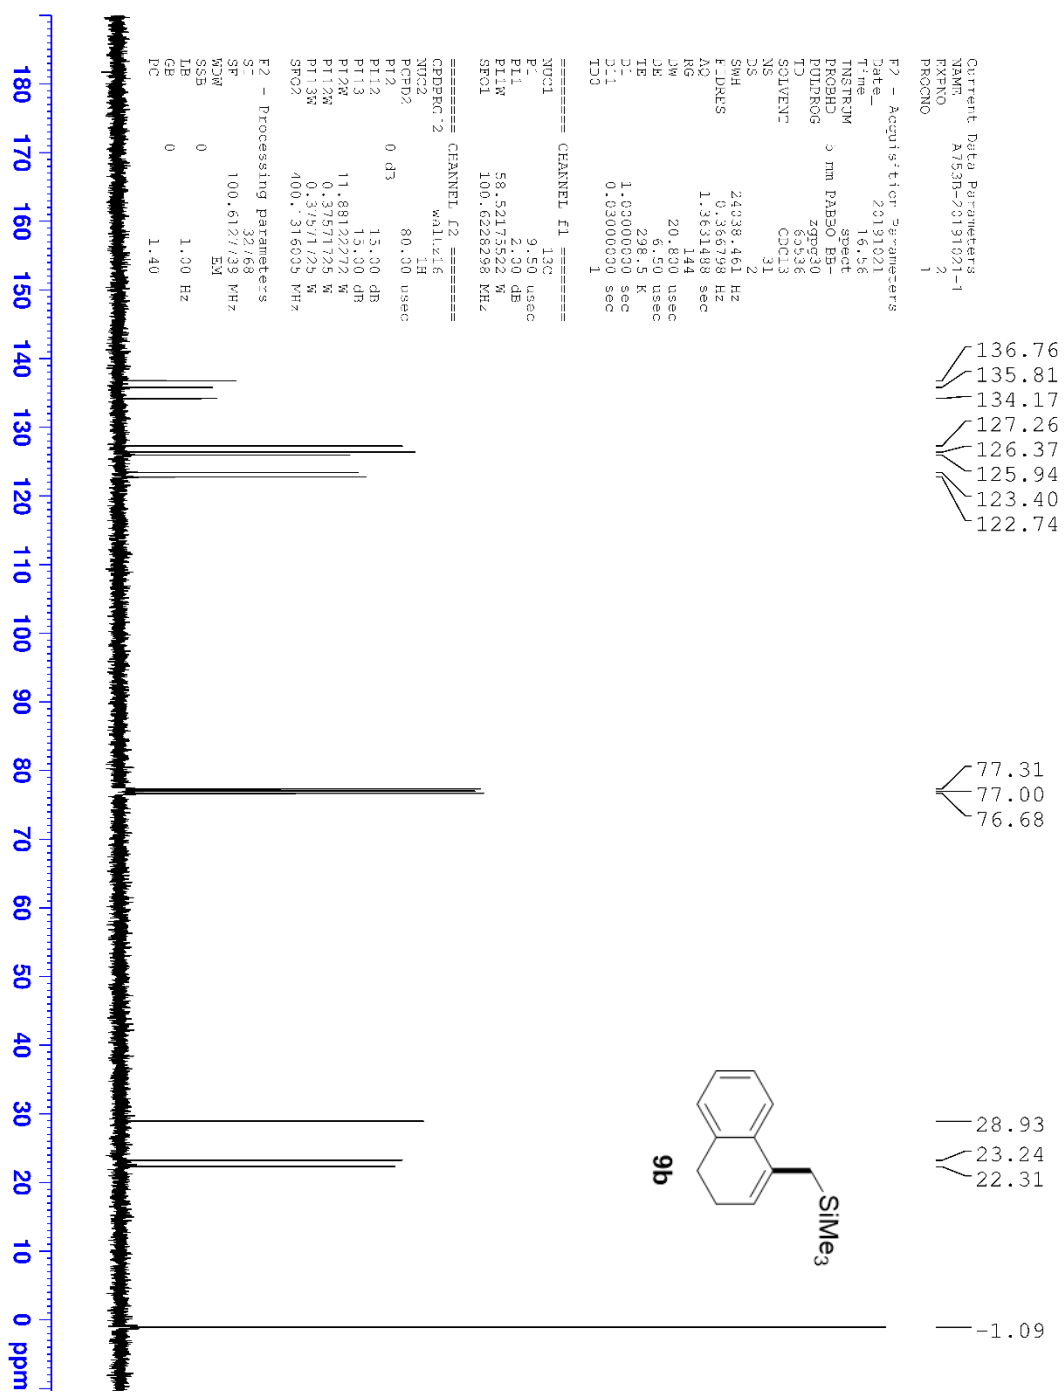

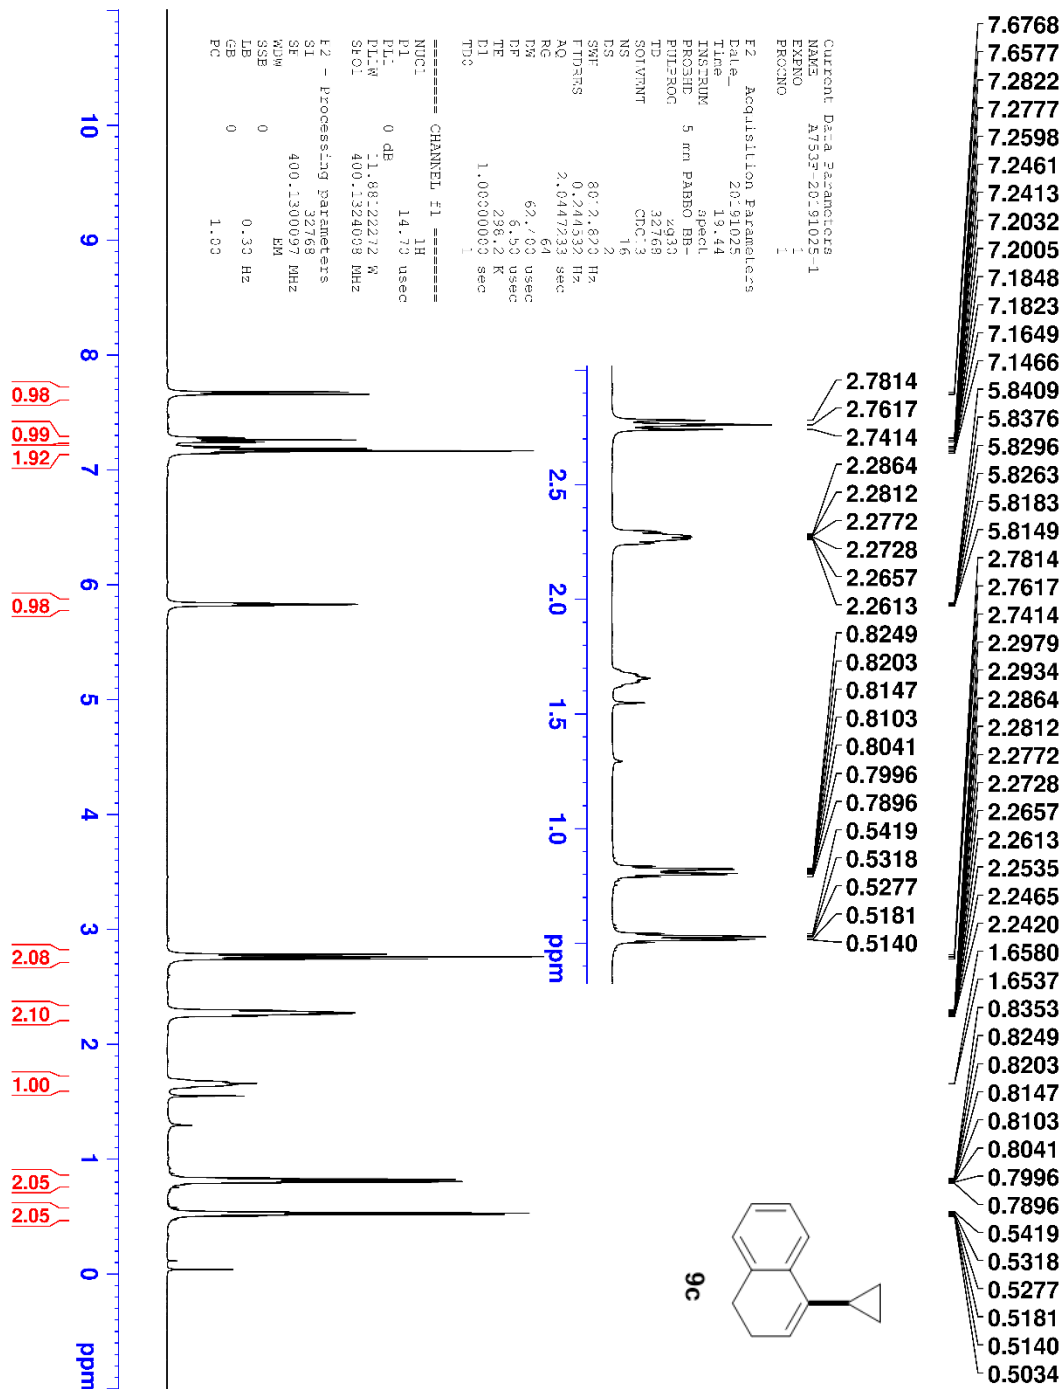

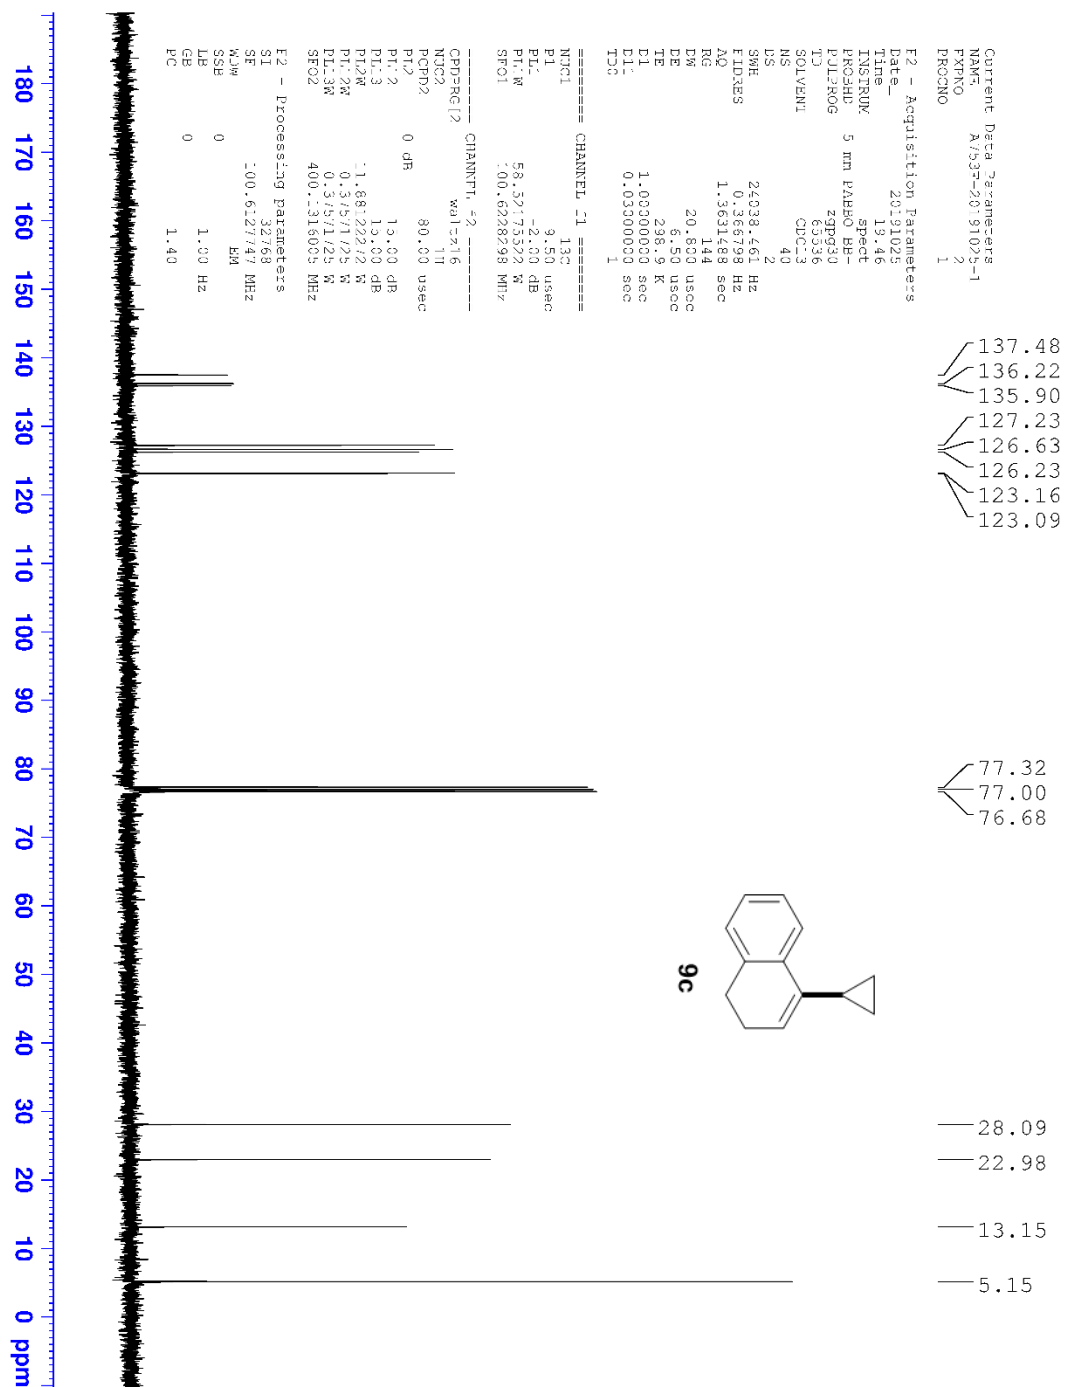

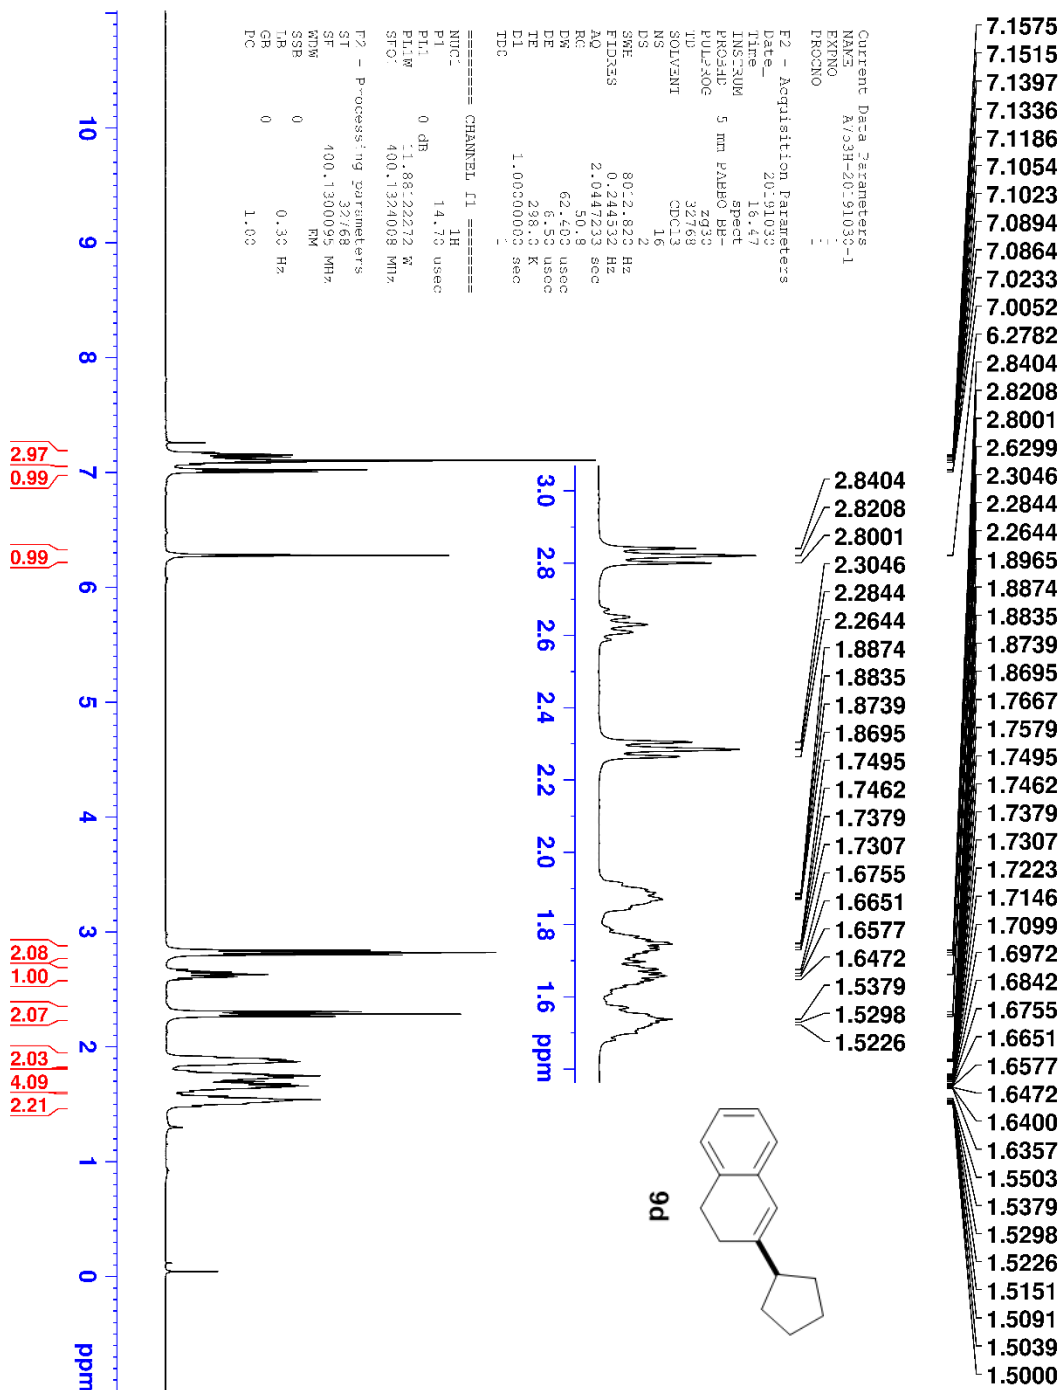

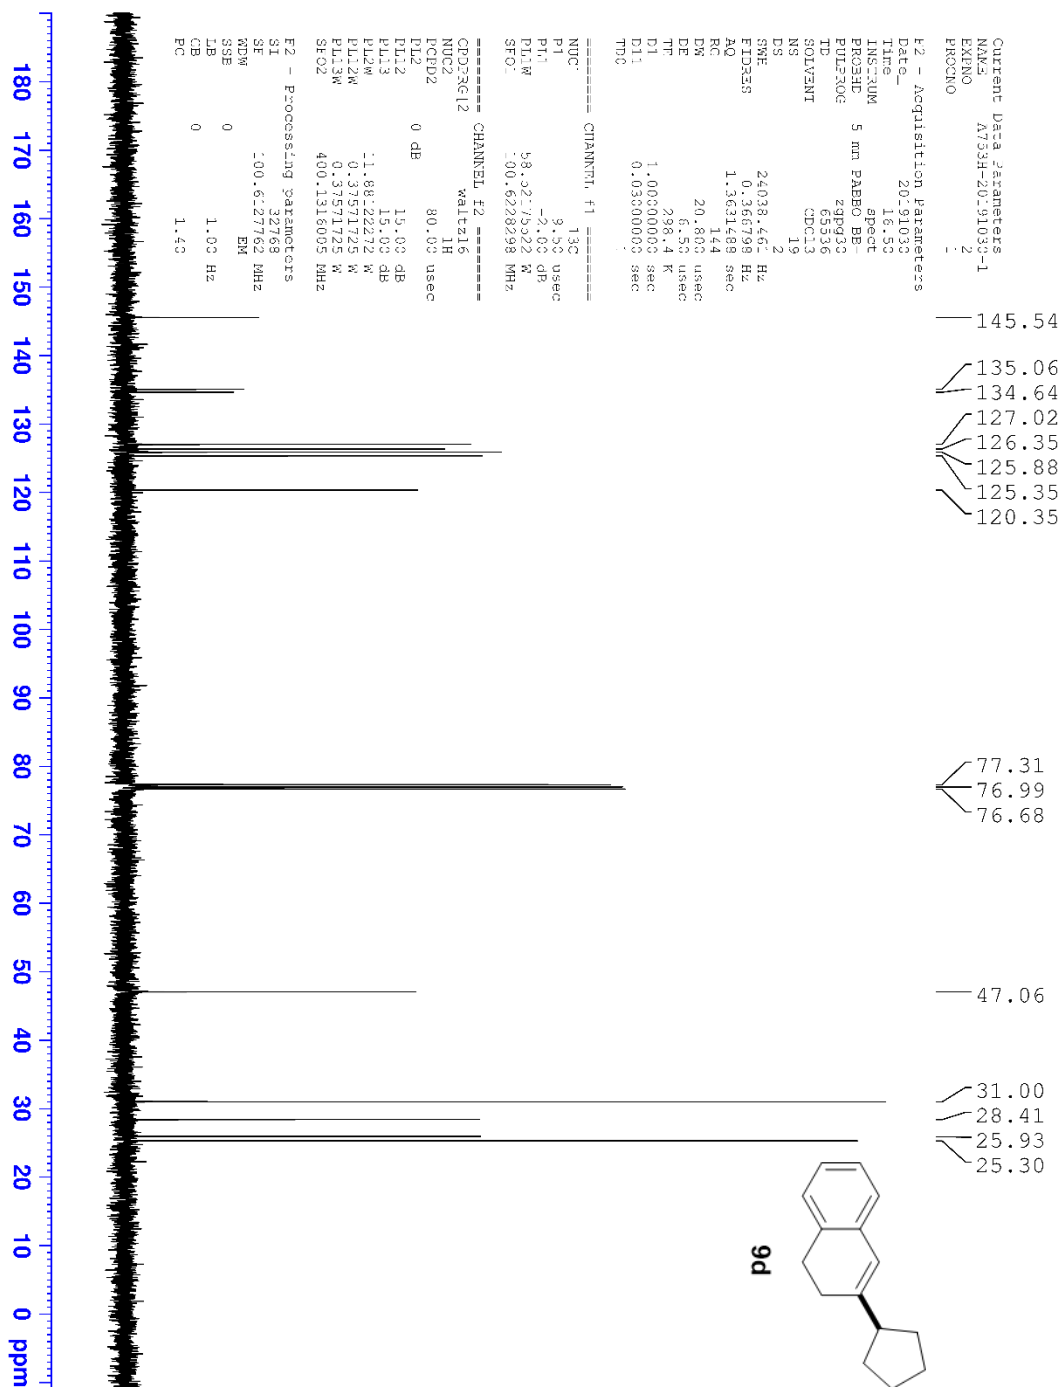

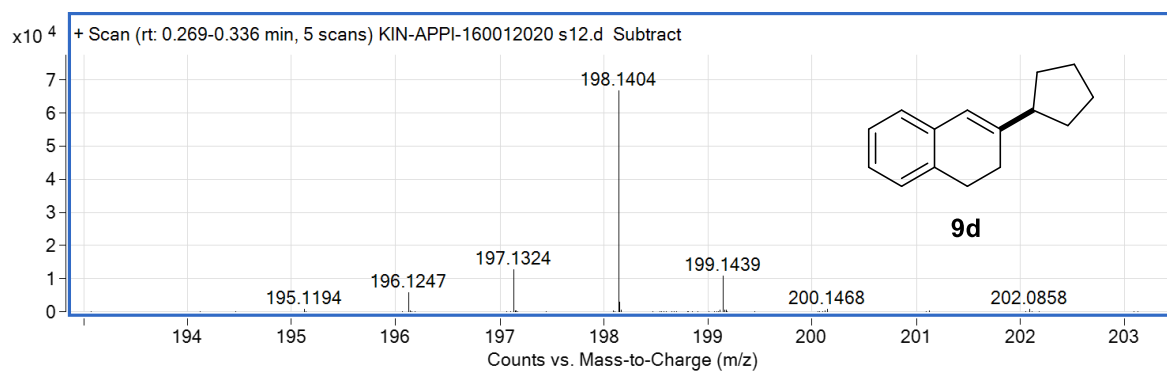

| Mass     | Calc. Mass | mDa  | PPM  | Formula                         |
|----------|------------|------|------|---------------------------------|
| 198.1404 | 198.1409   | 0.45 | 2.27 | C <sub>15</sub> H <sub>18</sub> |

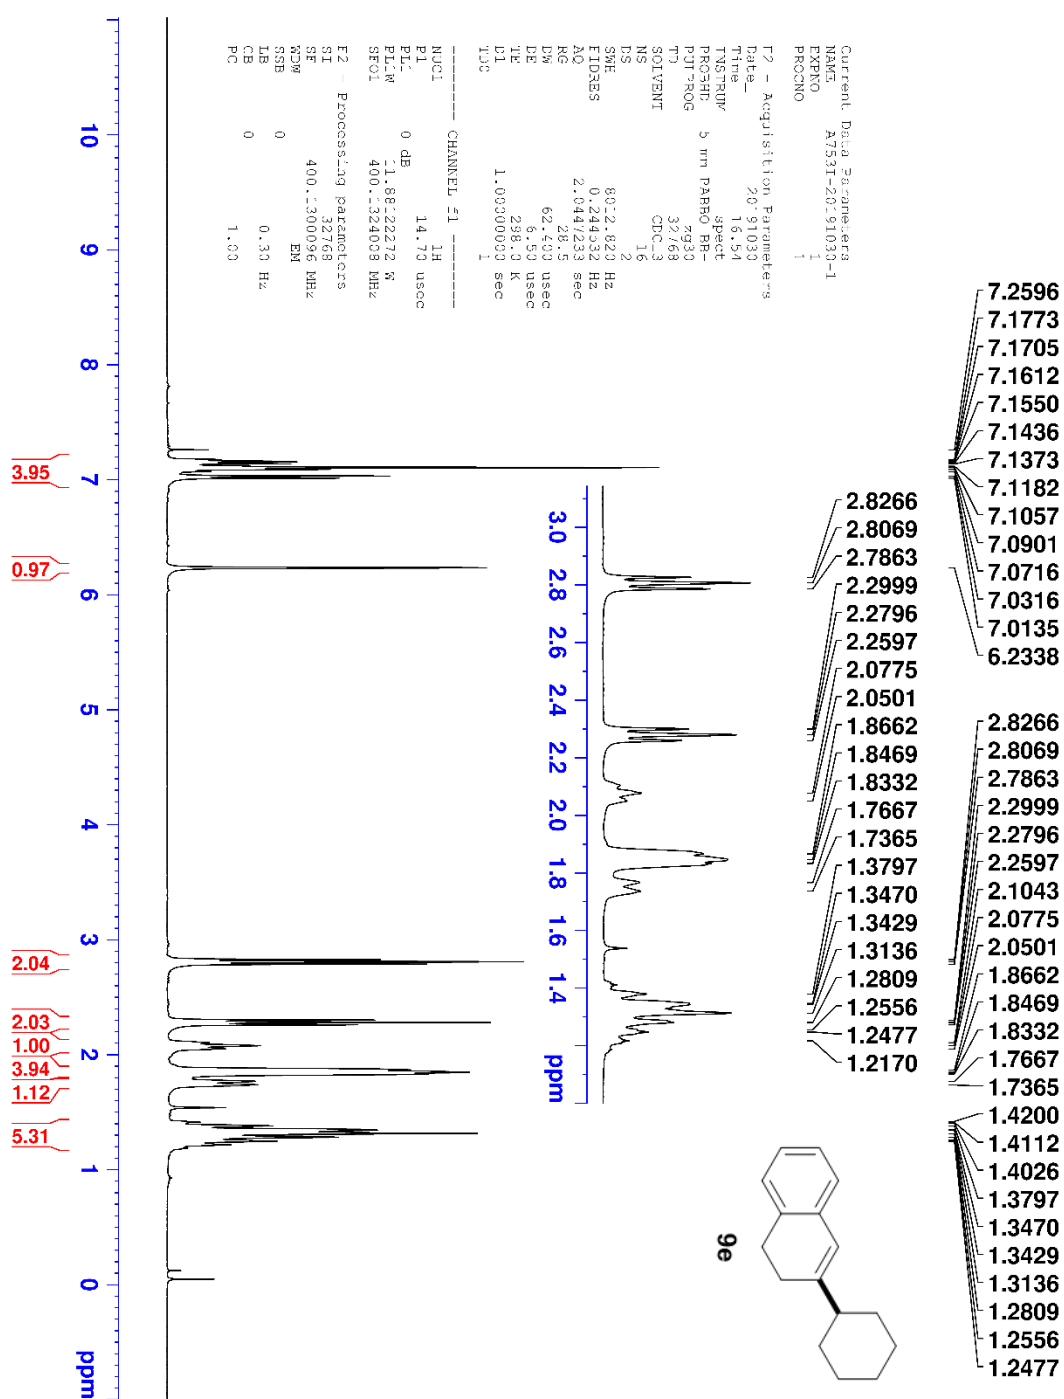

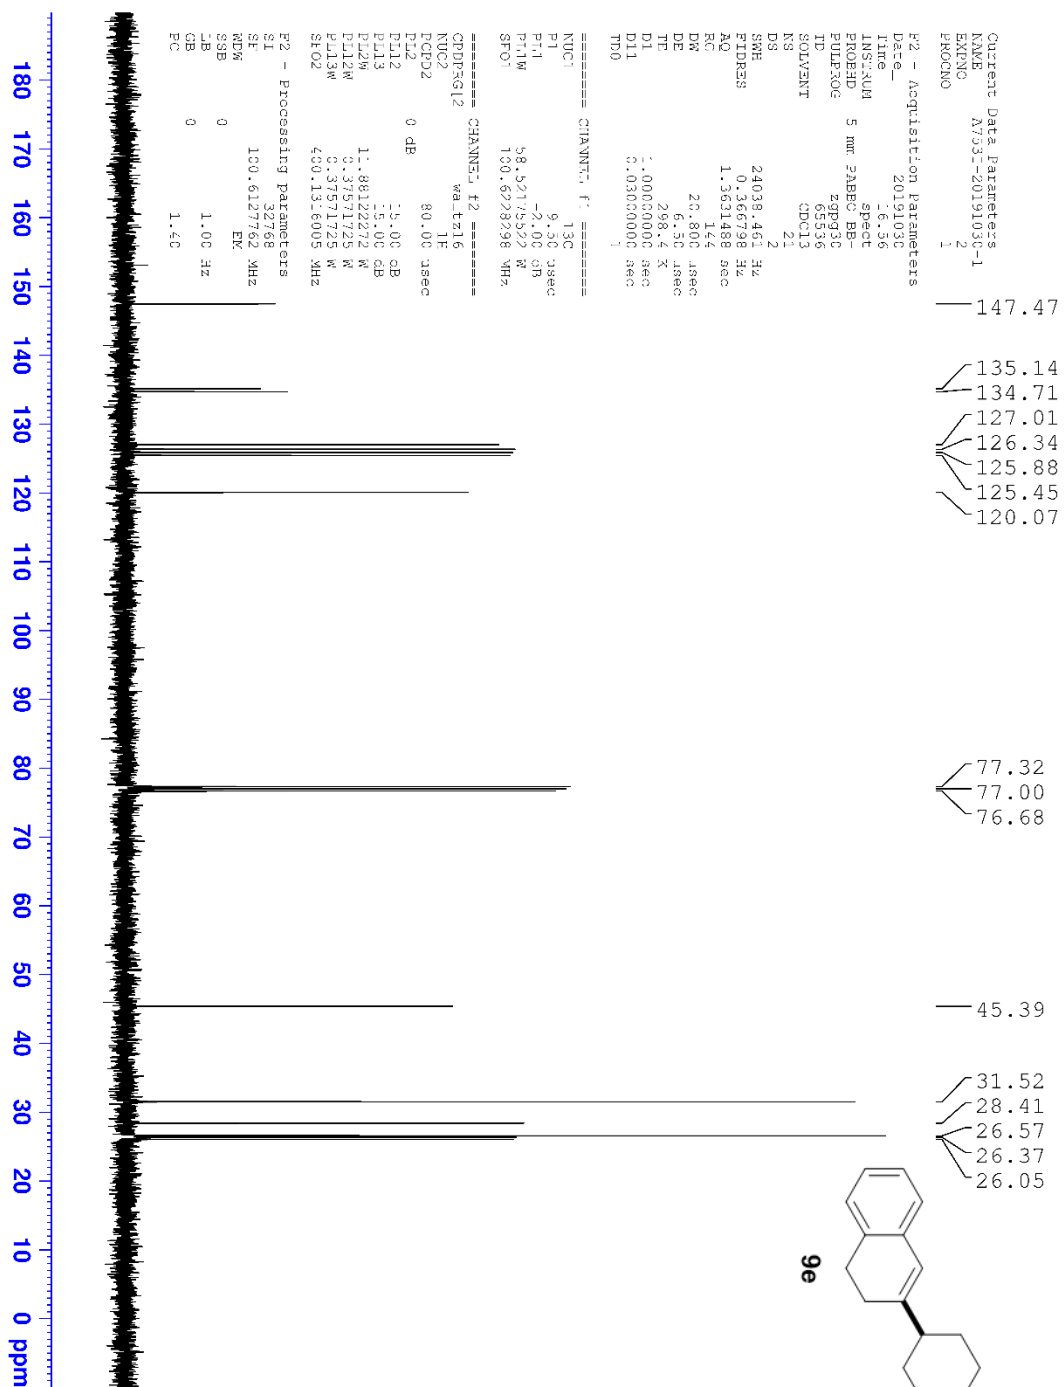



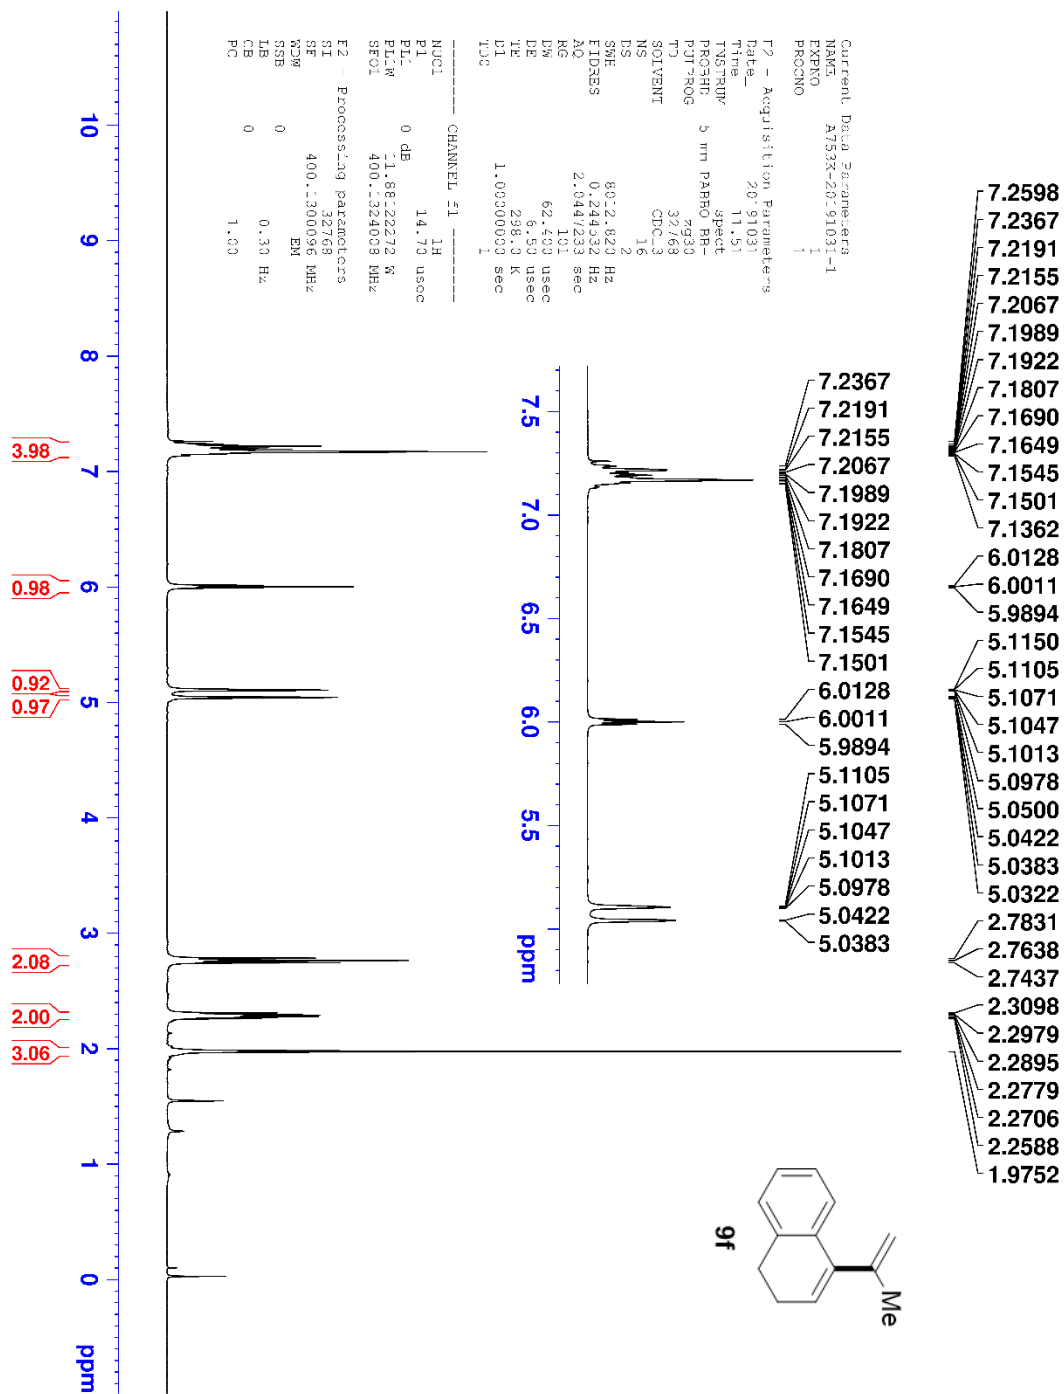

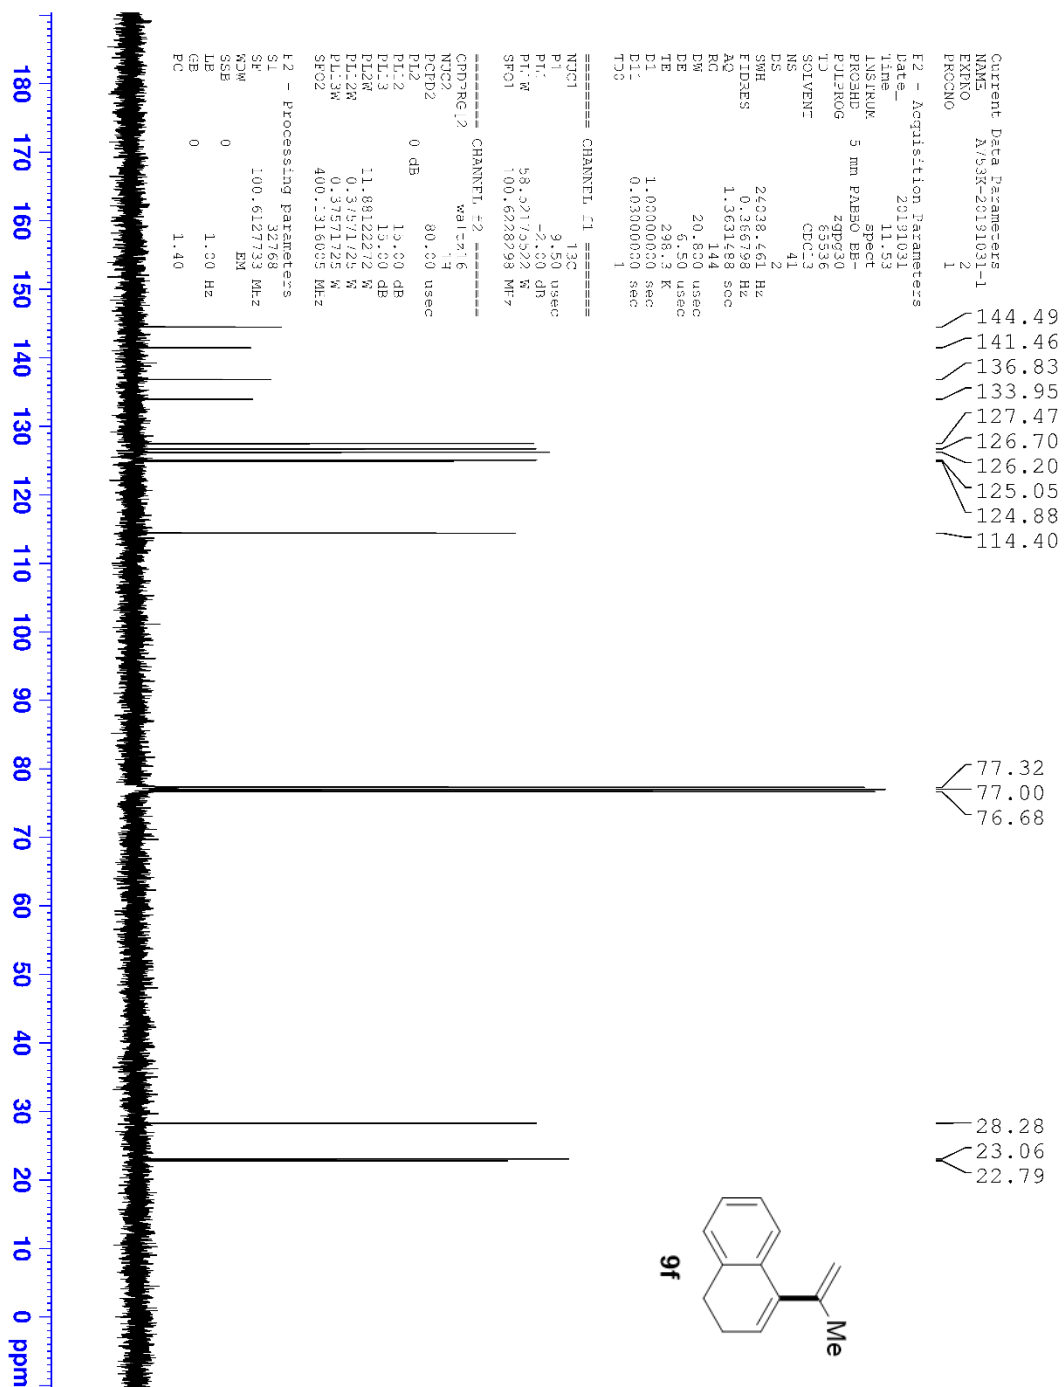

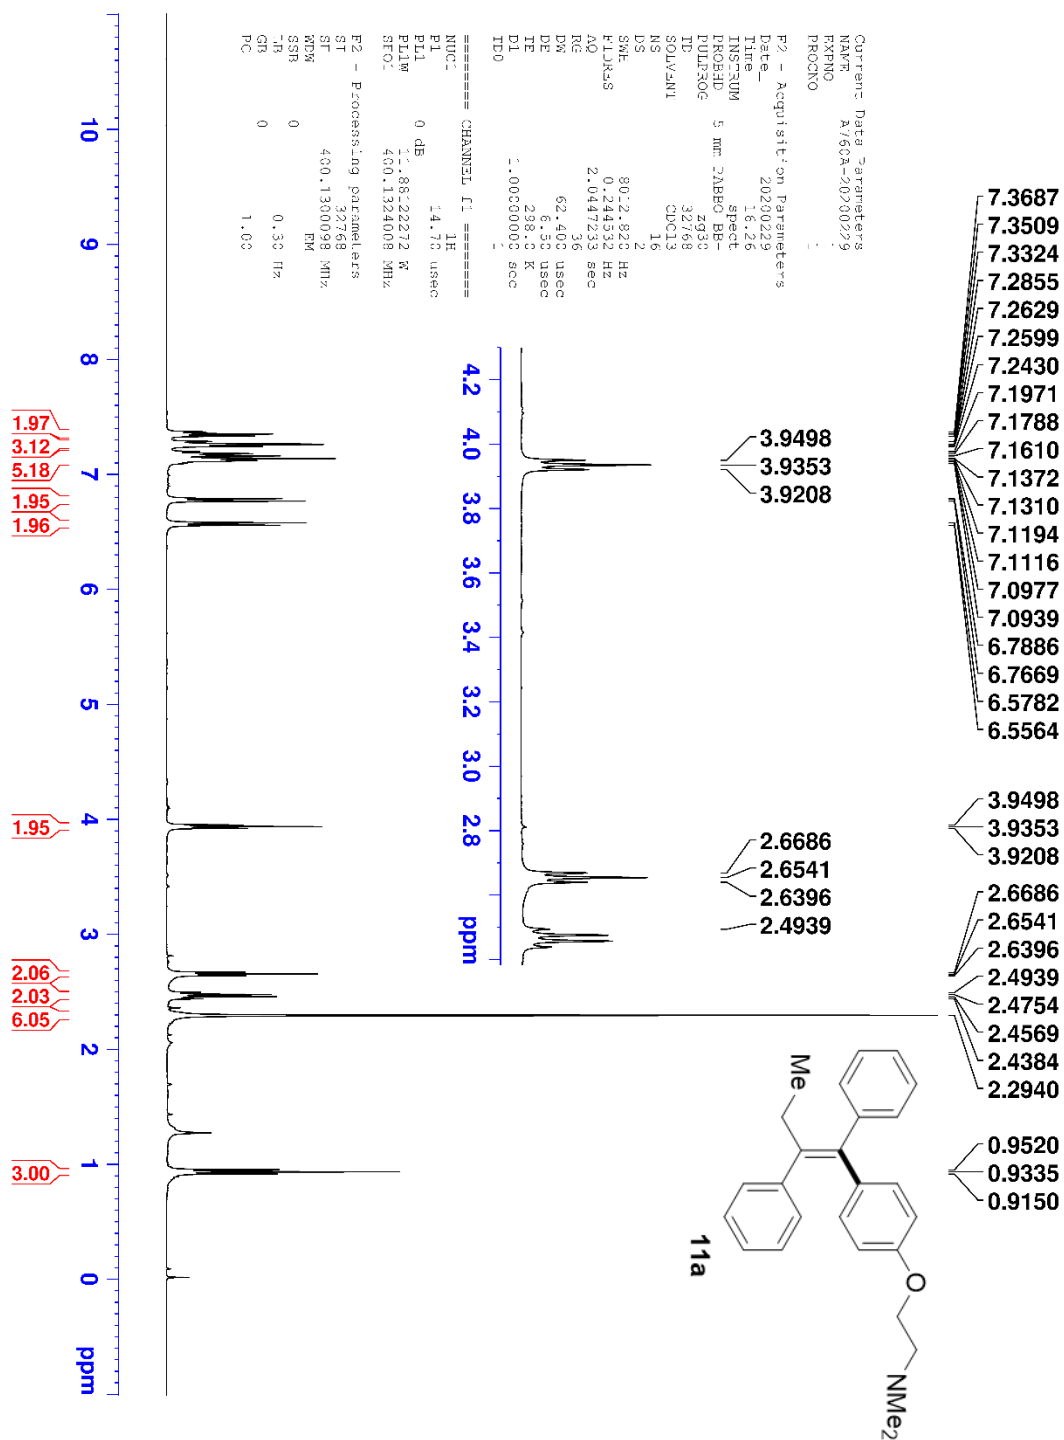

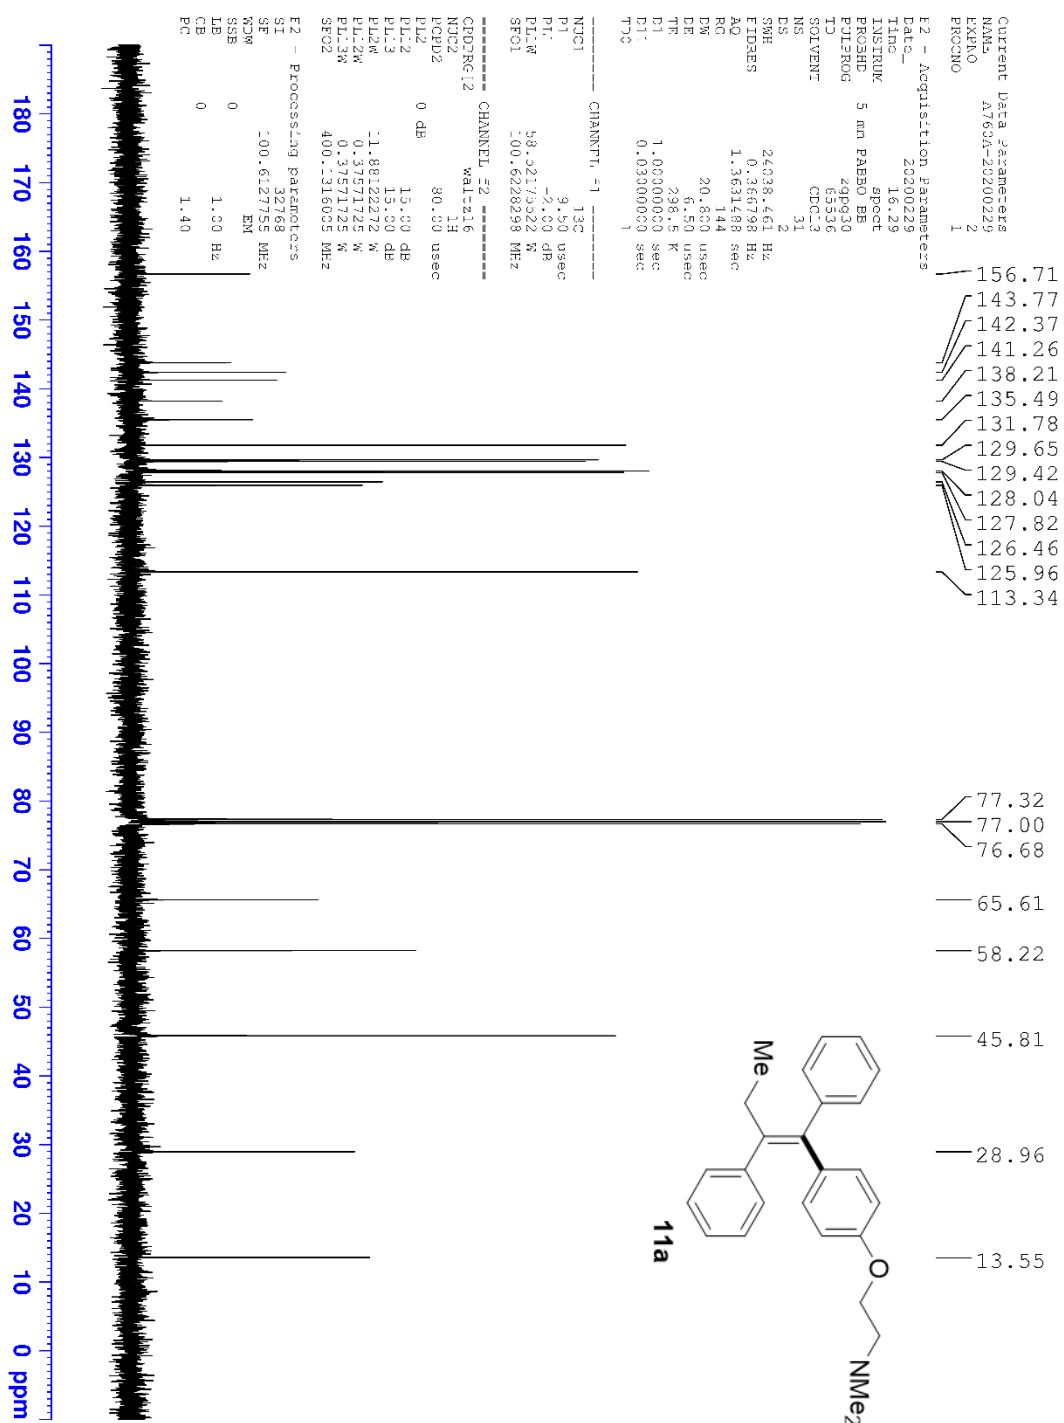

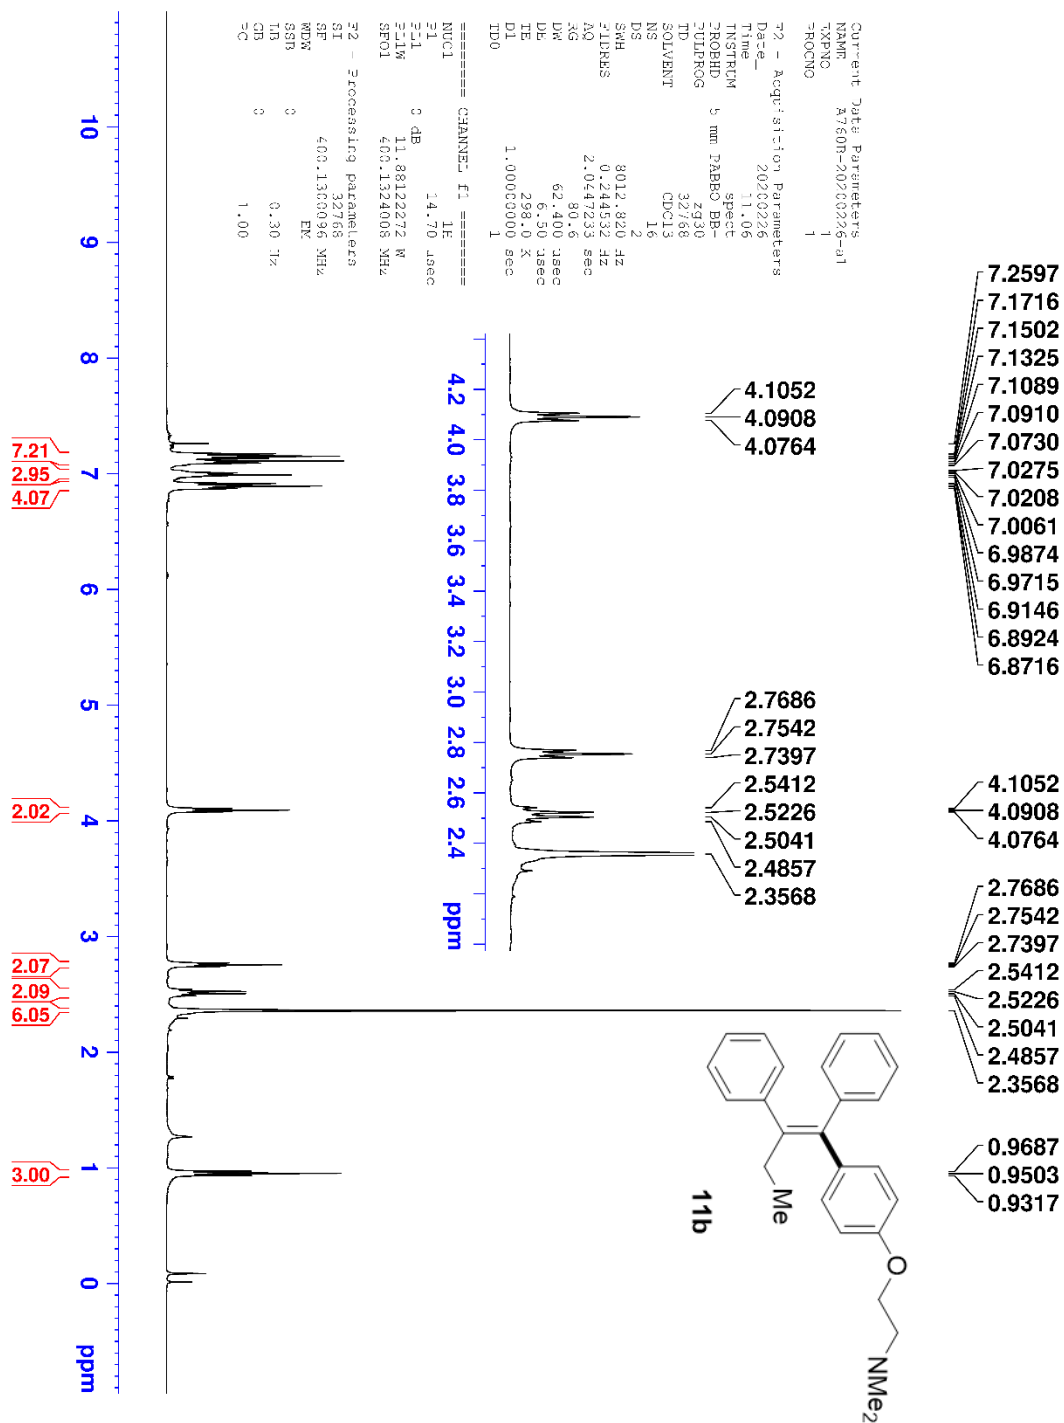

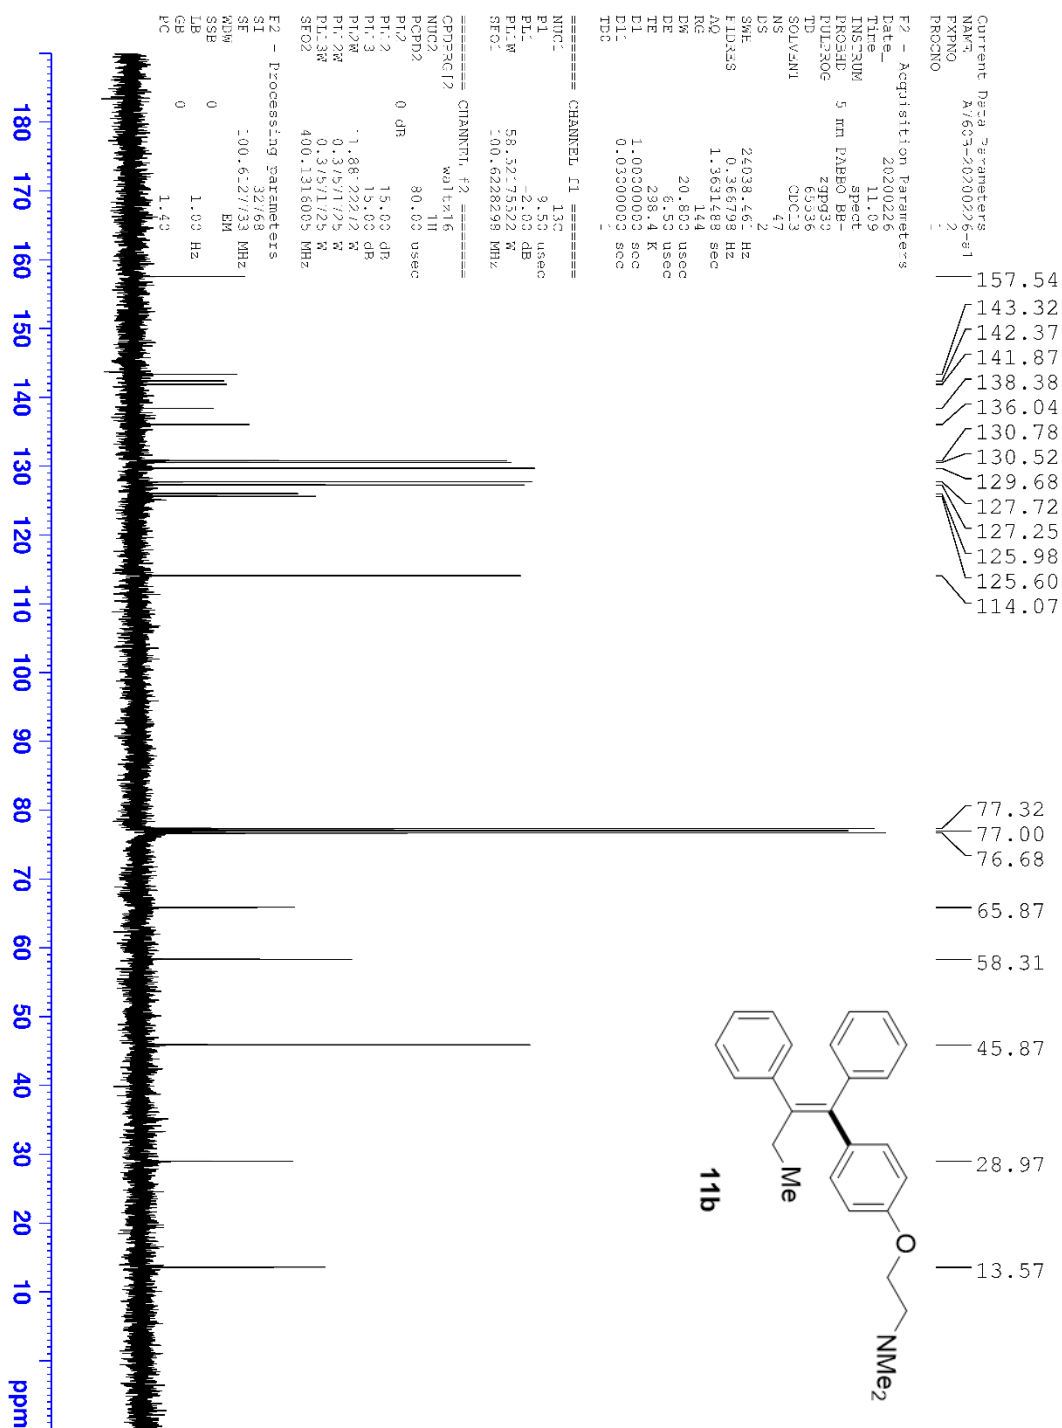

## 8. References

- (1) Armarego, W. L. F.; Perrin, D. D. In *Purification of Laboratory Chemicals*, Ed. 6; Armarego, W.L.F., Chai, C.L.L., Eds.; Butterworth-Heinemann: Oxford, **2009**; pp 88–444.
- (2) Liu, E.-C.; Chen, M.-K.; Li, J.-Y.; Wu, Y.-T. *Chem. Eur. J.* **2015**, *21*, 4755–4761.
- (3) Love, B. E.; Jones, E. G. *J. Org. Chem.* **1999**, *64*, 3755–3756.
- (4) Kinuta, H.; Hasegawa, J.; Tobisu, M.; Chatani, N. *Chemistry Letters* **2015**, *44*, 366–368.
- (5) Julienne, D.; Delacroix, O.; Gaumont, A.-C. *Phosphorus Sulfur Silicon Relat. Elem.* **2009**, *184*, 846–856.
- (6) Xu, L.; Li, B.-J.; Wu, Z.-H.; Lu, X.-Y.; Guan, B.-T.; Wang, B.-Q.; Zhao, K.-Q.; Shi, Z.-J. *Org. Lett.* **2010**, *12*, 884–887.
- (7) Stadlbauer, W.; Moser, C. V. Synthesis of heterocyclic carbamates with potential activity in plant protection. In *The 17th International Electronic Conference on Synthetic Organic Chemistry*, MDPI AG: Basel, Switzerland, 2013, pp a027/021–a027/011.
- (8) Liao, L.-L.; Gui, Y.-Y.; Zhang, X.-B.; Shen, G.; Liu, H.-D.; Zhou, W.-J.; Li, J.; Yu, D.-G. *Org. Lett.* **2017**, *19*, 3735–3738.
- (9) Jolliffe, J. D.; Armstrong, R. J.; Smith, M. D. *Nat. Chem.* **2017**, *9*, 558–562.
- (10) Barluenga, J.; Florentino, L.; Aznar, F.; Valdés, C. *Org. Lett.* **2011**, *13*, 510–513.
- (11) Choi, D. S.; Kim, J. H.; Shin, U. S.; Deshmukh, R. R.; Song, C. E. *Chem. Commun.* **2007**, 3482–3484.
- (12) Zhao, X.; Wu, G.; Yan, C.; Lu, K.; Li, H.; Zhang, Y.; Wang, J. *Org. Lett.* **2010**, *12*, 5580–5583.
- (13) Qu, B.; Samankumara, L. P.; Ma, S.; Fandrick, K. R.; Desrosiers, J.-N.; Rodriguez, S.; Li, Z.; Haddad, N.; Han, Z. S.; McKellop, K.; Pennino, S.; Grinberg, N.; Gonnella, N. C.; Song, J. J.; Senanayake, C. H. *Angew. Chem. Int. Ed.* **2014**, *53*, 14428–14432.
- (14) Zhu, G.; Kong, W.; Feng, H.; Qian, Z. *J. Org. Chem.* **2014**, *79*, 1786–1795.
- (15) Wong, P. Y.; Chow, W. K.; Chung, K. H.; So, C. M.; Lau, C. P.; Kwong, F. Y. *Chem. Commun.* **2011**, *47*, 8328–8330.
- (16) Xing, C.-H.; Lee, J.-R.; Tang, Z.-Y.; Zheng, J. R.; Hu, Q.-S. *Adv. Synth. Catal.* **2011**, *353*, 2051–2059.
- (17) Delorme, D.; Woo, S. H.; Vaisburg, A. Preparation of Hydroxamic Acids as Inhibitors of Histone Deacetylase, WO 2001070675A2, 2001.
- (18) Ackermann, L.; Kapdi, A. R.; Fenner, S.; Kornhaaß, C.; Schulzke, C. *Chem. Eur. J.* **2011**, *17*, 2965–2971.

- (19) Liu, E.-C.; Topczewski, J. J. *J. Am. Chem. Soc.* **2019**, *141*, 5135–5138.
- (20) Zhang, X.-Q.; Wang, Z.-X. *Synlett* **2013**, *24*, 2081–2084.
- (21) Li, B. -J.; Wu, Z. -H.; Guan, B. -T.; Sun, C. -L.; Wang, B. -Q.; Shi, Z. -J. *J. Am. Chem. Soc.* **2009**, *131*, 14656-14657.
- (22) Murthy, T. S.; Tilak, B. D., Thiophenes and thiapyrans. XXIV. Cyclodehydration of aroylmethyl aryl sulfides. *J. Sci. Ind. Res.* **1960**, *19B*, 395-401.
- (23) Nattmann, L.; Lutz, S.; Ortsack, P.; Goddard, R.; Cornella, J. *J. Am. Chem. Soc.* **2018**, *140*, 13628–13633.
- (24) Guo, L.; Leiendecker, M.; Hsiao, C.-C.; Baumann, C.; Rueping, M. *Chem. Commun.* **2015**, *51*, 1937–1940.
- (25) Wang, Y.-L.; Zhang, W.-M.; Dai, J.-J.; Feng, Y.-S.; Xu, H.-J. *RSC Adv.* **2014**, *4*, 61706–61710.
- (26) Gutsche, C. D.; Saha, N. N.; Johnson, H. E. *J. Am. Chem. Soc.* **1957**, *79*, 4441–4448.
- (27) Juo, R. R.; Herz, W. *J. Org. Chem.* **1985**, *50*, 700–703.
- (28) Hanna, L. E.; Konev, M. O.; Jarvo, E. R. *Eur. J. Org. Chem.* **2019**, *2019*, 184–187.
- (29) Heijnen, D.; van Zuijlen, M.; Tosi, F.; Feringa, B. L. *Org. Biomol. Chem.* **2019**, *17*, 2315–2320.
- (30) Itami, K.; Kamei, T.; Yoshida, J.-i. *J. Am. Chem. Soc.* **2003**, *125*, 14670–14671.
